# Supplementary material for: Analysis of Synonymous Codon Usage Bias in Potato Virus M and Its Adaption to Hosts
Source: Viruses. 2019 Aug 14;11(8):752. doi: 10.3390/v11080752 (PMC6722529; doi:10.3390/v11080752)
Supplement: Supplementary file 1 [file viruses-11-00752-s001.zip]

Archive with 4 entries (4 files):
- Table S1-The PVM using in this study-190312.docx
- Table S2-CP-codonW-v2-190710.xlsx
- Table S3-NABP-codonW-v2-190710.xlsx
- viruses-559046-suppl-figures caption.pdf
