# Supplementary material for: Analysis of Synonymous Codon Usage Bias in Potato Virus M and Its Adaption to Hosts
Source: Viruses. 2019 Aug 14;11(8):752. doi: 10.3390/v11080752 (PMC6722529; doi:10.3390/v11080752)
Supplement: Supplementary file 1 [file viruses-11-00752-s001.zip › Table S2-CP-codonW-v2-190710.xlsx]

## Sheet: Sheet1
title	T3s	C3s	A3s	G3s	CAI	CBI	Fop	Nc	GC3s	GC	L_sym	L_aa	Gravy	Aromo	Axis1	Axis2	%A	%C	%T	%G	%G+C	%A+T	%G1+C1	%G2+C2	%GC12	%G3+C3	%G3s+C3s	orign
p82KF561668_2011_Yunnan_p	0.296	0.26	0.2739	0.411	0.186	-0.029	0.404	54.63	0.531	0.536	292	304	-0.630592	0.0625	-0.04832	0.00345	26.7544	23.6842	19.6272	29.9342	53.6184	46.3816	58.5526	47.3684	52.9605	54.9342	53.0822	pepino
KF561667_2011_Yunnan_pepi	0.3	0.268	0.2696	0.4037	0.19	-0.028	0.404	54.99	0.531	0.534	292	304	-0.613487	0.0625	-0.07769	-0.0683	26.6447	23.6842	19.9561	29.7149	53.3991	46.6009	58.2237	47.0395	52.6316	54.9342	53.0822	pepino
KF561666_2011_Yunnan_pepi	0.296	0.264	0.2783	0.4037	0.184	-0.034	0.401	54.66	0.527	0.534	292	304	-0.619737	0.059211	-0.10643	-0.04062	26.864	23.6842	19.7368	29.7149	53.3991	46.6009	58.5526	47.0395	52.7961	54.6053	52.7397	pepino
KF561665_2011_Gansu_pepin	0.3016	0.25	0.29	0.3955	0.182	-0.017	0.41	53.97	0.512	0.53	293	304	-0.644737	0.059211	-0.081	-0.04728	27.193	23.4649	19.8465	29.4956	52.9605	47.0395	58.5526	47.3684	52.9605	52.9605	51.1945	pepino
KF561664_2011_Gansu_pepin	0.3068	0.247	0.2739	0.411	0.183	-0.022	0.408	54.93	0.521	0.534	292	304	-0.632566	0.0625	-0.04156	-0.0205	26.6447	23.3553	19.9561	30.0439	53.3991	46.6009	58.5526	47.6974	53.125	53.9474	52.0548	pepino
KF561663_2010_Gansu_tomat	0.2869	0.2629	0.2913	0.3973	0.186	-0.005	0.418	55.21	0.524	0.532	292	304	-0.603618	0.0625	-0.03326	-0.03749	27.193	23.5746	19.6272	29.6053	53.1798	46.8202	57.8947	47.3684	52.6316	54.2763	52.3973	tomato
KF561662_2010_Gansu_tomat	0.288	0.264	0.2913	0.3973	0.188	0.002	0.421	55.76	0.524	0.531	292	304	-0.616776	0.0625	-0.02369	-0.03315	27.193	23.5746	19.7368	29.4956	53.0702	46.9298	57.8947	47.0395	52.4671	54.2763	52.3973	tomato
KF561661_2010_Gansu_tomat	0.2948	0.259	0.2826	0.4018	0.19	0.008	0.425	55.24	0.524	0.533	292	304	-0.606579	0.0625	-0.00828	-0.01447	26.864	23.5746	19.8465	29.7149	53.2895	46.7105	58.2237	47.3684	52.7961	54.2763	52.3973	tomato
KF561660_2011_Yunnan_pepi	0.288	0.264	0.2826	0.4064	0.185	-0.035	0.401	54.74	0.531	0.536	292	304	-0.630592	0.0625	-0.05873	0.01106	26.9737	23.7939	19.4079	29.8246	53.6184	46.3816	58.5526	47.3684	52.9605	54.9342	53.0822	pepino
KF561659_2011_Yunnan_pepi	0.2789	0.2709	0.2795	0.4128	0.183	-0.04	0.397	54.07	0.541	0.541	292	304	-0.623026	0.0625	-0.05174	0.04502	26.6447	24.0132	19.2982	30.0439	54.057	45.943	58.5526	47.6974	53.125	55.9211	54.1096	pepino
KF561658_2011_Yunnan_pepi	0.292	0.268	0.2957	0.3836	0.195	-0.004	0.418	53.31	0.517	0.529	292	304	-0.630921	0.0625	-0.11129	-0.09947	27.4123	23.6842	19.7368	29.1667	52.8509	47.1491	57.8947	47.0395	52.4671	53.6184	51.7123	pepino
KF561657_2011_Yunnan_pepi	0.2948	0.2709	0.25	0.4163	0.196	0.026	0.435	56.64	0.548	0.545	292	304	-0.577961	0.0625	0.00893	0.0749	25.6579	23.9035	19.8465	30.5921	54.4956	45.5044	58.8816	48.0263	53.4539	56.5789	54.7945	pepino
KF561656_2011_Yunnan_pepi	0.3028	0.2629	0.25	0.4163	0.197	0.032	0.438	56.35	0.541	0.543	292	304	-0.577961	0.0625	0.01458	0.07532	25.6579	23.6842	20.0658	30.5921	54.2763	45.7237	58.8816	48.0263	53.4539	55.9211	54.1096	pepino
KF561655_2011_Yunnan_pepi	0.2948	0.2709	0.2672	0.3982	0.194	0.032	0.438	57.53	0.534	0.541	292	304	-0.577961	0.0625	0.02515	0.05209	26.0965	23.9035	19.8465	30.1535	54.057	45.943	58.8816	48.0263	53.4539	55.2632	53.4247	pepino
KF561654_2011_Yunnan_pepi	0.3	0.26	0.2511	0.4273	0.19	0.014	0.428	56.51	0.545	0.539	292	304	-0.598355	0.0625	-0.0581	-0.01096	25.9868	23.3553	20.0658	30.5921	53.9474	46.0526	58.2237	47.3684	52.7961	56.25	54.4521	pepino
KF561653_2011_Yunnan_pepi	0.2908	0.2709	0.2468	0.4273	0.191	0.026	0.435	54.77	0.555	0.545	292	304	-0.589474	0.0625	-0.09648	0.03136	25.7675	23.9035	19.7368	30.5921	54.4956	45.5044	58.5526	47.6974	53.125	57.2368	55.4795	pepino
KF561652_2011_Yunnan_pepi	0.3	0.26	0.2511	0.4273	0.19	0.014	0.428	56.51	0.545	0.539	292	304	-0.598355	0.0625	-0.0581	-0.01096	25.9868	23.3553	20.0658	30.5921	53.9474	46.0526	58.2237	47.3684	52.7961	56.25	54.4521	pepino
KF561651_2011_Yunnan_pepi	0.3	0.26	0.2511	0.4273	0.19	0.014	0.428	56.51	0.545	0.539	292	304	-0.598355	0.0625	-0.0581	-0.01096	25.9868	23.3553	20.0658	30.5921	53.9474	46.0526	58.2237	47.3684	52.7961	56.25	54.4521	pepino
KF561650_2011_Yunnan_pepi	0.292	0.268	0.2554	0.4227	0.188	0.014	0.428	56.57	0.548	0.543	292	304	-0.590132	0.0625	-0.07262	-0.01397	25.9868	23.6842	19.7368	30.5921	54.2763	45.7237	58.8816	47.3684	53.125	56.5789	54.7945	pepino
KF561649_2011_Yunnan_pepi	0.292	0.268	0.2759	0.4	0.182	-0.023	0.408	53.96	0.531	0.536	292	304	-0.589145	0.0625	-0.10443	-0.06838	26.6447	23.6842	19.7368	29.9342	53.6184	46.3816	58.2237	47.6974	52.9605	54.9342	53.0822	pepino
KF561648_2011_Yunnan_pepi	0.2857	0.2738	0.2684	0.4064	0.18	-0.016	0.411	53.37	0.541	0.541	292	304	-0.591119	0.0625	-0.10049	-0.03039	26.3158	23.9035	19.6272	30.1535	54.057	45.943	58.2237	48.0263	53.125	55.9211	54.1096	pepino
KF561647_2011_Yunnan_pepi	0.308	0.264	0.2652	0.4037	0.191	-0.028	0.404	54.41	0.527	0.533	292	304	-0.613487	0.0625	-0.08181	-0.06977	26.5351	23.5746	20.1754	29.7149	53.2895	46.7105	58.2237	47.0395	52.6316	54.6053	52.7397	pepino
KF561646_2011_Yunnan_pepi	0.292	0.268	0.2783	0.4037	0.185	-0.028	0.404	53.69	0.531	0.534	292	304	-0.613487	0.0625	-0.1254	-0.05683	26.864	23.6842	19.7368	29.7149	53.3991	46.6009	58.2237	47.0395	52.6316	54.9342	53.0822	pepino
KF561645_2011_Yunnan_pepi	0.2988	0.2709	0.2641	0.4064	0.19	-0.029	0.403	54.33	0.536	0.536	293	304	-0.605921	0.0625	-0.08128	-0.07129	26.4254	23.7939	19.9561	29.8246	53.6184	46.3816	58.5526	47.0395	52.7961	55.2632	53.5836	pepino
KF561644_2011_Yunnan_pepi	0.3	0.264	0.2783	0.3991	0.187	-0.028	0.404	53.91	0.524	0.532	292	304	-0.613487	0.0625	-0.10822	-0.05867	26.864	23.5746	19.9561	29.6053	53.1798	46.8202	58.2237	47.0395	52.6316	54.2763	52.3973	pepino
KF561643_2011_Yunnan_pepi	0.292	0.268	0.2783	0.4037	0.185	-0.028	0.404	53.69	0.531	0.534	292	304	-0.613487	0.0625	-0.1254	-0.05683	26.864	23.6842	19.7368	29.7149	53.3991	46.6009	58.2237	47.0395	52.6316	54.9342	53.0822	pepino
KF561642_2011_Yunnan_pepi	0.292	0.268	0.2826	0.3991	0.185	-0.028	0.404	54.42	0.527	0.534	292	304	-0.605263	0.0625	-0.12286	-0.05265	26.864	23.6842	19.7368	29.7149	53.3991	46.6009	58.5526	47.0395	52.7961	54.6053	52.7397	pepino
KF561641_2010_Gansu_pepin	0.28	0.276	0.2826	0.4018	0.191	0.006	0.425	52.87	0.538	0.537	292	304	-0.630592	0.0625	-0.11235	-0.05217	26.9737	24.0132	19.2982	29.7149	53.7281	46.2719	58.2237	47.3684	52.7961	55.5921	53.7671	pepino
KF561640_2010_Gansu_pepin	0.2789	0.2749	0.2857	0.3937	0.185	0.002	0.421	53.9	0.534	0.539	292	304	-0.623355	0.0625	-0.10909	-0.08707	26.7544	24.0132	19.2982	29.9342	53.9474	46.0526	58.5526	48.0263	53.2895	55.2632	53.4247	pepino
KF561639_2010_Gansu_pepin	0.292	0.26	0.2739	0.4155	0.188	-0.017	0.411	54.44	0.534	0.536	292	304	-0.609211	0.0625	-0.08742	-0.03493	26.6447	23.4649	19.7368	30.1535	53.6184	46.3816	58.5526	47.0395	52.7961	55.2632	53.4247	pepino
KF561638_2010_Gansu_pepin	0.3068	0.247	0.2739	0.411	0.183	-0.022	0.408	54.93	0.521	0.534	292	304	-0.632566	0.0625	-0.04156	-0.0205	26.6447	23.3553	19.9561	30.0439	53.3991	46.6009	58.5526	47.6974	53.125	53.9474	52.0548	pepino
KF561637_2010_Gansu_pepin	0.284	0.272	0.2826	0.4	0.186	-0.015	0.411	53.01	0.534	0.536	292	304	-0.623684	0.0625	-0.12585	-0.07506	26.864	23.7939	19.5175	29.8246	53.6184	46.3816	58.5526	47.0395	52.7961	55.2632	53.4247	pepino
KF561636_2010_Gansu_pepin	0.3	0.252	0.2857	0.4	0.186	-0.028	0.404	54.69	0.517	0.532	292	304	-0.63454	0.059211	-0.04499	-0.05071	27.0833	23.4649	19.7368	29.7149	53.1798	46.8202	58.5526	47.3684	52.9605	53.6184	51.7123	pepino
KF561635_2010_Gansu_pepin	0.2988	0.255	0.2652	0.4201	0.183	-0.011	0.414	50.92	0.534	0.539	292	304	-0.642434	0.0625	-0.06195	-0.10397	26.2061	23.5746	19.8465	30.3728	53.9474	46.0526	58.5526	48.0263	53.2895	55.2632	53.4247	pepino
KF561634_2010_Gansu_pepin	0.2988	0.259	0.2609	0.4201	0.182	-0.01	0.414	51.91	0.538	0.539	292	304	-0.624671	0.0625	-0.03842	-0.11298	26.0965	23.5746	19.9561	30.3728	53.9474	46.0526	58.5526	47.6974	53.125	55.5921	53.7671	pepino
KF561633_2010_Gansu_pepin	0.2908	0.2709	0.2554	0.4182	0.187	-0.009	0.414	53.61	0.548	0.542	292	304	-0.617434	0.0625	-0.06032	-0.06537	25.9868	23.7939	19.8465	30.3728	54.1667	45.8333	58.2237	47.6974	52.9605	56.5789	54.7945	pepino
KF561632_2010_Gansu_pepin	0.292	0.268	0.2641	0.4136	0.186	-0.016	0.411	53.68	0.541	0.538	292	304	-0.614145	0.0625	-0.05837	-0.10906	26.3158	23.6842	19.8465	30.1535	53.8377	46.1623	58.2237	47.3684	52.7961	55.9211	54.1096	pepino
KF561631_2010_Gansu_pepin	0.296	0.264	0.2609	0.4201	0.19	-0.01	0.414	52.67	0.541	0.537	292	304	-0.623026	0.0625	-0.05454	-0.04774	26.3158	23.5746	19.9561	30.1535	53.7281	46.2719	58.2237	47.0395	52.6316	55.9211	54.1096	pepino
KF561630_2010_Gansu_pepin	0.296	0.264	0.2609	0.4201	0.185	-0.022	0.408	53.71	0.541	0.539	292	304	-0.632566	0.0625	-0.0689	-0.06502	26.2061	23.6842	19.8465	30.2632	53.9474	46.0526	58.5526	47.3684	52.9605	55.9211	54.1096	pepino
KF561629_2010_Gansu_pepin	0.2948	0.259	0.2739	0.411	0.182	-0.028	0.404	53.95	0.531	0.536	292	304	-0.632895	0.0625	-0.06632	-0.08073	26.5351	23.5746	19.8465	30.0439	53.6184	46.3816	58.2237	47.6974	52.9605	54.9342	53.0822	pepino
KF561628_2010_Gansu_pepin	0.312	0.248	0.2696	0.411	0.187	-0.03	0.404	53.91	0.521	0.532	292	304	-0.61875	0.0625	-0.06063	-0.1018	26.5351	23.2456	20.2851	29.9342	53.1798	46.8202	58.2237	47.3684	52.7961	53.9474	52.0548	pepino
KF561627_2010_Gansu_pepin	0.288	0.268	0.2783	0.4064	0.186	-0.011	0.414	54.39	0.534	0.536	292	304	-0.630921	0.0625	-0.06228	-0.08646	26.7544	23.7939	19.6272	29.8246	53.6184	46.3816	58.2237	47.3684	52.7961	55.2632	53.4247	pepino
KF561626_2010_Gansu_pepin	0.2948	0.259	0.3	0.3836	0.183	-0.03	0.404	57.12	0.51	0.531	292	304	-0.606908	0.0625	-0.04888	-0.07726	27.3026	23.5746	19.6272	29.4956	53.0702	46.9298	58.5526	47.6974	53.125	52.9605	51.0274	pepino
KF561625_2010_Gansu_pepin	0.3	0.256	0.2739	0.411	0.186	-0.017	0.411	53.83	0.527	0.534	292	304	-0.630921	0.0625	-0.06591	-0.07779	26.6447	23.4649	19.9561	29.9342	53.3991	46.6009	58.2237	47.3684	52.7961	54.6053	52.7397	pepino
KF561624_2010_Gansu_pepin	0.296	0.26	0.2696	0.4155	0.184	-0.029	0.404	53.9	0.534	0.536	292	304	-0.630921	0.0625	-0.05748	-0.07751	26.5351	23.5746	19.8465	30.0439	53.6184	46.3816	58.2237	47.3684	52.7961	55.2632	53.4247	pepino
KF561623_2010_Gansu_pepin	0.2948	0.2629	0.2957	0.3818	0.184	-0.031	0.404	56.72	0.514	0.533	292	304	-0.624342	0.0625	-0.04637	-0.0628	27.193	23.6842	19.5175	29.6053	53.2895	46.7105	58.5526	48.0263	53.2895	53.2895	51.3699	pepino
KF561622_2010_Gansu_pepin	0.2908	0.2629	0.2957	0.3899	0.184	-0.031	0.404	56.91	0.517	0.532	292	304	-0.604605	0.0625	-0.04547	-0.06714	27.3026	23.5746	19.5175	29.6053	53.1798	46.8202	58.2237	47.6974	52.9605	53.6184	51.7123	pepino
KF561621_2010_Gansu_pepin	0.2897	0.2619	0.2974	0.3846	0.185	-0.027	0.406	56.7	0.515	0.534	293	304	-0.605263	0.0625	-0.05442	-0.07263	27.193	23.7939	19.4079	29.6053	53.3991	46.6009	58.5526	48.3553	53.4539	53.2895	51.5358	pepino
KF561620_2011_Jilin_pepin	0.276	0.272	0.2826	0.4091	0.186	-0.029	0.401	53.89	0.541	0.536	292	304	-0.600658	0.0625	-0.12317	-0.05764	26.864	23.5746	19.5175	30.0439	53.6184	46.3816	58.5526	46.3816	52.4671	55.9211	54.1096	pepino
KF561619_2011_Jilin_pepin	0.276	0.268	0.2826	0.4136	0.184	-0.035	0.397	53.68	0.541	0.536	292	304	-0.600658	0.0625	-0.13252	-0.05193	26.864	23.4649	19.5175	30.1535	53.6184	46.3816	58.5526	46.3816	52.4671	55.9211	54.1096	pepino
KF561618_2011_Jilin_pepin	0.276	0.272	0.2826	0.4091	0.186	-0.029	0.401	53.89	0.541	0.536	292	304	-0.600658	0.0625	-0.12317	-0.05764	26.864	23.5746	19.5175	30.0439	53.6184	46.3816	58.5526	46.3816	52.4671	55.9211	54.1096	pepino
KF561617_2011_Jilin_pepin	0.272	0.276	0.2826	0.4091	0.188	-0.024	0.404	54	0.545	0.537	292	304	-0.600658	0.0625	-0.12097	-0.05738	26.864	23.6842	19.4079	30.0439	53.7281	46.2719	58.5526	46.3816	52.4671	56.25	54.4521	pepino
KF561616_2011_Jilin_pepin	0.276	0.272	0.2826	0.4091	0.186	-0.03	0.401	54.19	0.541	0.537	292	304	-0.618421	0.0625	-0.12376	-0.05099	26.864	23.6842	19.4079	30.0439	53.7281	46.2719	58.5526	46.7105	52.6316	55.9211	54.1096	pepino
KF561615_2011_Jilin_pepin	0.28	0.272	0.287	0.4	0.181	-0.04	0.394	54.82	0.534	0.533	292	304	-0.592763	0.0625	-0.1272	-0.06388	26.9737	23.4649	19.7368	29.8246	53.2895	46.7105	58.5526	46.0526	52.3026	55.2632	53.4247	pepino
KF561614_2011_Jilin_pepin	0.276	0.272	0.2826	0.4091	0.186	-0.029	0.401	53.89	0.541	0.536	292	304	-0.600658	0.0625	-0.12317	-0.05764	26.864	23.5746	19.5175	30.0439	53.6184	46.3816	58.5526	46.3816	52.4671	55.9211	54.1096	pepino
KF561613_2011_Jilin_pepin	0.276	0.272	0.2826	0.4091	0.186	-0.029	0.401	53.89	0.541	0.536	292	304	-0.600658	0.0625	-0.12317	-0.05764	26.864	23.5746	19.5175	30.0439	53.6184	46.3816	58.5526	46.3816	52.4671	55.9211	54.1096	pepino
KF561612_2011_Jilin_pepin	0.288	0.268	0.2696	0.4155	0.19	-0.014	0.411	50.45	0.541	0.538	292	304	-0.614803	0.0625	-0.13913	-0.08629	26.6447	23.7939	19.5175	30.0439	53.8377	46.1623	58.8816	46.7105	52.7961	55.9211	54.1096	pepino
KF561611_2011_Jilin_pepin	0.284	0.272	0.2739	0.411	0.186	-0.019	0.408	51.66	0.541	0.535	292	304	-0.606908	0.0625	-0.12653	-0.09125	26.864	23.6842	19.6272	29.8246	53.5088	46.4912	58.2237	46.3816	52.3026	55.9211	54.1096	pepino
KF561610_2011_Jilin_pepin	0.288	0.268	0.2739	0.411	0.187	-0.014	0.411	49.61	0.538	0.537	292	304	-0.606579	0.0625	-0.13412	-0.10335	26.6447	23.6842	19.6272	30.0439	53.7281	46.2719	58.8816	46.7105	52.7961	55.5921	53.7671	pepino
KF561609_2011_Jilin_pepin	0.288	0.268	0.2739	0.411	0.187	-0.014	0.411	49.75	0.538	0.538	292	304	-0.598355	0.0625	-0.13338	-0.10156	26.5351	23.6842	19.6272	30.1535	53.8377	46.1623	59.2105	46.7105	52.9605	55.5921	53.7671	pepino
KF561608_2011_Jilin_pepin	0.28	0.268	0.2739	0.4201	0.188	-0.015	0.411	48.71	0.545	0.539	292	304	-0.594408	0.0625	-0.15768	-0.07991	26.6447	23.6842	19.4079	30.2632	53.9474	46.0526	58.8816	46.7105	52.7961	56.25	54.4521	pepino
KF561607_2011_Jilin_pepin	0.288	0.268	0.2739	0.411	0.187	-0.016	0.411	49.04	0.538	0.538	292	304	-0.614474	0.0625	-0.13957	-0.09757	26.6447	23.7939	19.5175	30.0439	53.8377	46.1623	58.8816	47.0395	52.9605	55.5921	53.7671	pepino
KF561606_2011_Jilin_pepin	0.2771	0.2691	0.2783	0.4201	0.19	-0.021	0.408	48.82	0.545	0.539	292	304	-0.596382	0.0625	-0.15694	-0.08581	26.7544	23.6842	19.2982	30.2632	53.9474	46.0526	59.2105	46.3816	52.7961	56.25	54.4521	pepino
KF561605_2011_Jilin_pepin	0.296	0.26	0.2913	0.3927	0.18	-0.056	0.387	52.5	0.517	0.53	292	304	-0.614803	0.0625	-0.12704	-0.06452	27.193	23.4649	19.8465	29.4956	52.9605	47.0395	58.5526	46.7105	52.6316	53.6184	51.7123	pepino
KF561604_2011_Jilin_pepin	0.296	0.26	0.2913	0.3927	0.18	-0.056	0.387	52.5	0.517	0.53	292	304	-0.614803	0.0625	-0.12704	-0.06452	27.193	23.4649	19.8465	29.4956	52.9605	47.0395	58.5526	46.7105	52.6316	53.6184	51.7123	pepino
KF561603_2011_Jilin_pepin	0.284	0.268	0.2913	0.3973	0.184	-0.038	0.397	52.73	0.527	0.533	292	304	-0.614803	0.0625	-0.12122	-0.06426	27.193	23.6842	19.5175	29.6053	53.2895	46.7105	58.5526	46.7105	52.6316	54.6053	52.7397	pepino
KF561602_2011_Jilin_pepin	0.292	0.264	0.2913	0.3927	0.18	-0.056	0.387	52.44	0.521	0.531	292	304	-0.614803	0.0625	-0.13193	-0.06329	27.193	23.5746	19.7368	29.4956	53.0702	46.9298	58.5526	46.7105	52.6316	53.9474	52.0548	pepino
KF561601_2011_Jilin_pepin	0.3	0.256	0.2913	0.3927	0.177	-0.062	0.384	53.06	0.514	0.53	292	304	-0.632566	0.0625	-0.13181	-0.05036	27.193	23.4649	19.8465	29.4956	52.9605	47.0395	58.5526	47.0395	52.7961	53.2895	51.3699	pepino
KF561600_2011_Jilin_pepin	0.296	0.26	0.2913	0.3927	0.18	-0.056	0.387	52.5	0.517	0.53	292	304	-0.614803	0.0625	-0.12704	-0.06452	27.193	23.4649	19.8465	29.4956	52.9605	47.0395	58.5526	46.7105	52.6316	53.6184	51.7123	pepino
KF561599_2011_Jilin_pepin	0.2771	0.2731	0.2826	0.4091	0.188	-0.03	0.401	54.45	0.541	0.535	292	304	-0.597369	0.0625	-0.10427	-0.05928	26.9737	23.5746	19.5175	29.9342	53.5088	46.4912	58.5526	46.0526	52.3026	55.9211	54.1096	pepino
KF561598_2011_Jilin_pepin	0.288	0.264	0.2913	0.3973	0.183	-0.044	0.394	52.62	0.524	0.532	292	304	-0.614803	0.0625	-0.12341	-0.06451	27.193	23.5746	19.6272	29.6053	53.1798	46.8202	58.5526	46.7105	52.6316	54.2763	52.3973	pepino
KF561597_2011_Jilin_pepin	0.292	0.264	0.2913	0.3927	0.18	-0.056	0.387	52.44	0.521	0.531	292	304	-0.614803	0.0625	-0.13193	-0.06329	27.193	23.5746	19.7368	29.4956	53.0702	46.9298	58.5526	46.7105	52.6316	53.9474	52.0548	pepino
KF561596_2011_Jilin_pepin	0.272	0.276	0.2783	0.4136	0.187	-0.018	0.408	53.18	0.548	0.541	292	304	-0.576645	0.0625	-0.13508	-0.04262	26.5351	23.5746	19.4079	30.4825	54.057	45.943	59.5395	46.0526	52.7961	56.5789	54.7945	pepino
KF561595_2011_Jilin_pepin	0.272	0.276	0.2783	0.4136	0.189	-0.012	0.411	52.61	0.548	0.542	292	304	-0.598027	0.0625	-0.13196	-0.04918	26.6447	23.7939	19.1886	30.3728	54.1667	45.8333	59.5395	46.3816	52.9605	56.5789	54.7945	pepino
KF561594_2011_Jilin_pepin	0.272	0.276	0.2727	0.4163	0.184	-0.023	0.404	52.81	0.551	0.543	292	304	-0.602303	0.0625	-0.13534	-0.03415	26.4254	23.6842	19.2982	30.5921	54.2763	45.7237	59.2105	46.7105	52.9605	56.9079	55.137	pepino
KF561593_2011_Jilin_pepin	0.276	0.272	0.2783	0.4136	0.186	-0.024	0.404	52.97	0.545	0.539	292	304	-0.598027	0.0625	-0.13347	-0.04038	26.6447	23.5746	19.4079	30.3728	53.9474	46.0526	59.2105	46.3816	52.7961	56.25	54.4521	pepino
KF561592_2011_Jilin_pepin	0.272	0.276	0.2783	0.4136	0.187	-0.018	0.408	53.2	0.548	0.541	292	304	-0.598027	0.0625	-0.12682	-0.0506	26.6447	23.6842	19.2982	30.3728	54.057	45.943	59.2105	46.3816	52.7961	56.5789	54.7945	pepino
KF561591_2011_Qinghai_pep	0.2869	0.2629	0.2913	0.3973	0.182	-0.035	0.401	55.69	0.524	0.534	292	304	-0.620395	0.0625	-0.08403	-0.06346	27.193	23.6842	19.4079	29.7149	53.3991	46.6009	58.2237	47.6974	52.9605	54.2763	52.3973	pepino
KF561590_2011_Qinghai_pep	0.3	0.252	0.2845	0.3982	0.186	-0.023	0.408	55.37	0.517	0.534	292	304	-0.602961	0.0625	-0.0472	-0.08808	26.864	23.4649	19.7368	29.9342	53.3991	46.6009	58.5526	48.0263	53.2895	53.6184	51.7123	pepino
KF561589_2011_Qinghai_pep	0.284	0.268	0.3	0.3881	0.184	-0.031	0.404	56.27	0.521	0.533	292	304	-0.638487	0.0625	-0.06269	-0.0608	27.5219	23.7939	19.1886	29.4956	53.2895	46.7105	58.2237	47.6974	52.9605	53.9474	52.0548	pepino
KF561588_2011_Qinghai_pep	0.28	0.272	0.3043	0.3836	0.184	-0.033	0.401	57.89	0.521	0.533	292	304	-0.632237	0.0625	-0.06032	-0.07469	27.5219	23.9035	19.1886	29.386	53.2895	46.7105	58.5526	47.3684	52.9605	53.9474	52.0548	pepino
KF561587_2011_Qinghai_pep	0.28	0.272	0.3057	0.3853	0.185	-0.03	0.404	57.27	0.521	0.53	292	304	-0.626316	0.0625	-0.06603	-0.06038	27.8509	23.7939	19.1886	29.1667	52.9605	47.0395	57.8947	47.0395	52.4671	53.9474	52.0548	pepino
KF561586_2011_Qinghai_pep	0.2851	0.2691	0.3057	0.3807	0.185	-0.028	0.405	57.67	0.515	0.53	291	304	-0.646053	0.065789	-0.06298	-0.06267	27.7412	23.5746	19.2982	29.386	52.9605	47.0395	57.5658	47.6974	52.6316	53.6184	51.5464	pepino
KF561585_2011_Beijing_pep	0.308	0.244	0.3	0.3881	0.188	-0.017	0.411	56.21	0.5	0.527	292	304	-0.621053	0.0625	-0.00468	-0.01984	27.3026	23.136	19.9561	29.6053	52.7412	47.2588	58.8816	47.3684	53.125	51.9737	50	pepino
KF561584_2011_Beijing_pep	0.28	0.272	0.3	0.3881	0.184	-0.029	0.404	57.36	0.524	0.532	292	304	-0.630592	0.0625	-0.05458	-0.07473	27.5219	23.7939	19.2982	29.386	53.1798	46.8202	57.8947	47.3684	52.6316	54.2763	52.3973	pepino
KF561583_2011_Beijing_pep	0.288	0.264	0.3	0.3881	0.183	-0.035	0.401	56.88	0.517	0.53	292	304	-0.630592	0.0625	-0.06377	-0.07052	27.5219	23.5746	19.5175	29.386	52.9605	47.0395	57.8947	47.3684	52.6316	53.6184	51.7123	pepino
KF561582_2011_Beijing_pep	0.28	0.272	0.3	0.3864	0.186	-0.034	0.401	56.56	0.524	0.534	292	304	-0.623026	0.0625	-0.07461	-0.06202	27.3026	23.9035	19.2982	29.4956	53.3991	46.6009	58.5526	47.3684	52.9605	54.2763	52.3973	pepino
KJ473993_2013_India_potat	0.3441	0.2753	0.2643	0.3548	0.229	0.122	0.49	53.54	0.5	0.516	290	304	-0.612171	0.0625	0.38166	-0.14112	26.6447	23.3553	21.7105	28.2895	51.6447	48.3553	56.5789	46.0526	51.3158	52.3026	50	potato
KJ473992_2013_India_potat	0.2932	0.261	0.2609	0.4312	0.173	-0.061	0.384	51.97	0.545	0.539	292	304	-0.631579	0.0625	-0.02199	0.06179	26.4254	23.5746	19.6272	30.3728	53.9474	46.0526	58.8816	46.7105	52.7961	56.25	54.4521	potato
KJ569697_2013_India_potat	0.2742	0.2742	0.2814	0.4136	0.186	-0.029	0.404	58.21	0.545	0.538	292	304	-0.614474	0.0625	-0.02791	0.13577	26.864	23.6842	19.2982	30.1535	53.8377	46.1623	58.5526	46.7105	52.6316	56.25	54.4521	potato
KJ569696_2013_India_potat	0.3427	0.2782	0.2763	0.3394	0.219	0.11	0.485	48.89	0.491	0.512	291	304	-0.629605	0.0625	0.27239	-0.22323	27.3026	23.136	21.4912	28.0702	51.2061	48.7939	55.9211	46.3816	51.1513	51.3158	49.1409	potato
X57440-_1990_Germany_toma	0.2874	0.2632	0.2845	0.4054	0.19	-0.024	0.404	56.94	0.531	0.535	292	304	-0.622697	0.0625	-0.00139	0.14881	26.7544	23.5746	19.7368	29.9342	53.5088	46.4912	59.2105	46.3816	52.7961	54.9342	53.0822	tomato
NC001361_2008_Russia_toma	0.3065	0.254	0.2771	0.4027	0.192	-0.015	0.411	56.16	0.521	0.532	292	304	-0.6375	0.0625	-0.01257	0.14042	26.6447	23.136	20.1754	30.0439	53.1798	46.8202	58.8816	46.7105	52.7961	53.9474	52.0548	tomato
JX678982_2011_Iran_potato	0.3024	0.254	0.2597	0.4253	0.186	-0.027	0.404	56.01	0.538	0.537	292	304	-0.626645	0.0625	-0.01632	0.23621	26.2061	23.2456	20.0658	30.4825	53.7281	46.2719	58.8816	46.7105	52.7961	55.5921	53.7671	potato
KJ194171_2013_India_potat	0.2661	0.2823	0.29	0.4045	0.179	-0.022	0.408	57.24	0.545	0.538	292	304	-0.64704	0.0625	0.04662	0.11252	27.193	24.1228	18.9693	29.7149	53.8377	46.1623	58.2237	47.0395	52.6316	56.25	54.4521	potato
JN835299_2011_Gansu_tomat	0.2869	0.2629	0.2913	0.3973	0.188	0.002	0.421	55.08	0.524	0.533	292	304	-0.606579	0.0625	-0.03136	-0.03092	27.0833	23.6842	19.6272	29.6053	53.2895	46.7105	58.2237	47.3684	52.7961	54.2763	52.3973	tomato
AY311395_2003_Poland_Un	0.296	0.256	0.2652	0.4247	0.189	-0.005	0.418	55.12	0.538	0.538	292	304	-0.622369	0.0625	-0.0931	-0.04619	26.4254	23.4649	19.7368	30.3728	53.8377	46.1623	58.5526	47.3684	52.9605	55.5921	53.7671	Un
AY311394_2003_Poland_Un	0.288	0.272	0.2565	0.4247	0.187	-0.012	0.414	53.81	0.551	0.543	292	304	-0.648355	0.0625	-0.11453	-0.03937	26.3158	24.0132	19.4079	30.2632	54.2763	45.7237	58.2237	47.6974	52.9605	56.9079	55.137	Un
EU604672_2008_Gremany_tob	0.2944	0.2661	0.2727	0.4091	0.182	-0.014	0.411	56.38	0.534	0.533	292	304	-0.617763	0.0625	-0.00802	0.11407	26.6447	23.3553	20.0658	29.9342	53.2895	46.7105	58.2237	46.3816	52.3026	55.2632	53.4247	tob
AJ437481_2002_Zhejiang_pe	0.284	0.268	0.287	0.4018	0.185	-0.033	0.401	54.27	0.531	0.535	292	304	-0.622697	0.0625	-0.1119	-0.05688	27.0833	23.7939	19.4079	29.7149	53.5088	46.4912	58.5526	47.0395	52.7961	54.9342	53.0822	pepino
GQ496609_2007_Latvia_pota	0.3012	0.261	0.2424	0.4364	0.179	-0.003	0.418	54.11	0.551	0.543	292	304	-0.632895	0.0625	0.00169	0.15608	25.7675	23.4649	19.9561	30.8114	54.2763	45.7237	58.8816	47.0395	52.9605	56.9079	55.137	potato
KC479343_2011_Iran_potato	0.3012	0.253	0.2641	0.4208	0.184	-0.031	0.401	56.26	0.534	0.536	292	304	-0.608553	0.0625	-0.0164	0.23829	26.2061	23.136	20.1754	30.4825	53.6184	46.3816	58.8816	46.7105	52.7961	55.2632	53.4247	potato
KC479342_2011_Iran_potato	0.2972	0.257	0.2672	0.4189	0.183	-0.044	0.392	56.01	0.536	0.537	293	304	-0.602961	0.0625	0.00024	0.27091	26.2061	23.2456	20.0658	30.4825	53.7281	46.2719	59.5395	46.3816	52.9605	55.2632	53.5836	potato
KC479341_2011_Iran_potato	0.3024	0.254	0.2641	0.4208	0.186	-0.031	0.401	56.32	0.534	0.535	292	304	-0.61875	0.0625	-0.01533	0.23364	26.3158	23.136	20.1754	30.3728	53.5088	46.4912	58.8816	46.3816	52.6316	55.2632	53.4247	potato
KC479340_2011_Iran_potato	0.3024	0.254	0.2641	0.4208	0.186	-0.031	0.401	56.32	0.534	0.535	292	304	-0.61875	0.0625	-0.01533	0.23364	26.3158	23.136	20.1754	30.3728	53.5088	46.4912	58.8816	46.3816	52.6316	55.2632	53.4247	potato
KC479339_2011_Iran_potato	0.3024	0.254	0.2684	0.4163	0.186	-0.031	0.401	56.72	0.531	0.534	292	304	-0.61875	0.0625	-0.01777	0.23736	26.4254	23.136	20.1754	30.2632	53.3991	46.6009	58.8816	46.3816	52.6316	54.9342	53.0822	potato
KC479338_2011_Iran_potato	0.3024	0.254	0.2641	0.4208	0.186	-0.031	0.401	56.32	0.534	0.535	292	304	-0.61875	0.0625	-0.01533	0.23364	26.3158	23.136	20.1754	30.3728	53.5088	46.4912	58.8816	46.3816	52.6316	55.2632	53.4247	potato
KC479337_2011_Iran_potato	0.3024	0.254	0.2641	0.4208	0.186	-0.031	0.401	56.32	0.534	0.535	292	304	-0.61875	0.0625	-0.01533	0.23364	26.3158	23.136	20.1754	30.3728	53.5088	46.4912	58.8816	46.3816	52.6316	55.2632	53.4247	potato
KC479336_2011_Iran_potato	0.2984	0.2581	0.2684	0.4163	0.184	-0.033	0.401	56.88	0.534	0.536	292	304	-0.633882	0.0625	-0.00288	0.22289	26.4254	23.2456	19.9561	30.3728	53.6184	46.3816	58.8816	46.7105	52.7961	55.2632	53.4247	potato
KC479334_2011_Iran_potato	0.3024	0.254	0.2641	0.4208	0.186	-0.031	0.401	56.32	0.534	0.535	292	304	-0.61875	0.0625	-0.01533	0.23364	26.3158	23.136	20.1754	30.3728	53.5088	46.4912	58.8816	46.3816	52.6316	55.2632	53.4247	potato
KC479332_2011_Iran_potato	0.2984	0.2581	0.2641	0.4208	0.189	-0.02	0.408	56.45	0.538	0.538	292	304	-0.609211	0.0625	-0.00554	0.22865	26.0965	23.2456	20.0658	30.5921	53.8377	46.1623	59.5395	46.3816	52.9605	55.5921	53.7671	potato
KC479331_2011_Iran_potato	0.3	0.252	0.2629	0.4234	0.182	-0.039	0.396	56.1	0.536	0.537	293	304	-0.613158	0.0625	-0.0231	0.2442	26.0965	23.2456	20.1754	30.4825	53.7281	46.2719	59.2105	46.7105	52.9605	55.2632	53.5836	potato
KC129101_2011_Iran_potato	0.2984	0.2581	0.2586	0.4234	0.181	-0.037	0.397	55.45	0.541	0.538	292	304	-0.610855	0.0625	-0.02559	0.26773	26.0965	23.2456	20.0658	30.5921	53.8377	46.1623	58.8816	46.7105	52.7961	55.9211	54.1096	potato
KC129100_2011_Iran_potato	0.3494	0.2651	0.2183	0.4064	0.246	0.071	0.462	54.21	0.531	0.531	292	304	-0.625987	0.0625	0.4111	0.04127	25.2193	23.4649	21.7105	29.6053	53.0702	46.9298	57.5658	46.7105	52.1382	54.9342	53.0822	potato
KC129099_2011_Iran_potato	0.3494	0.2651	0.2183	0.4064	0.246	0.071	0.462	54.21	0.531	0.531	292	304	-0.625987	0.0625	0.4111	0.04127	25.2193	23.4649	21.7105	29.6053	53.0702	46.9298	57.5658	46.7105	52.1382	54.9342	53.0822	potato
KC129098_2011_Iran_potato	0.3024	0.254	0.2641	0.4208	0.186	-0.031	0.401	56.32	0.534	0.535	292	304	-0.61875	0.0625	-0.01533	0.23364	26.3158	23.136	20.1754	30.3728	53.5088	46.4912	58.8816	46.3816	52.6316	55.2632	53.4247	potato
KC129097_2011_Iran_potato	0.3494	0.2651	0.2183	0.4064	0.246	0.071	0.462	54.21	0.531	0.531	292	304	-0.625987	0.0625	0.4111	0.04127	25.2193	23.4649	21.7105	29.6053	53.0702	46.9298	57.5658	46.7105	52.1382	54.9342	53.0822	potato
KC129096_2011_Iran_potato	0.3092	0.2731	0.262	0.3937	0.199	-0.025	0.401	57.9	0.531	0.529	292	304	-0.564474	0.065789	0.33714	-0.15794	25.9868	23.136	21.1623	29.7149	52.8509	47.1491	58.5526	45.0658	51.8092	54.9342	53.0822	potato
KC129094_2011_Iran_potato	0.3213	0.2651	0.2576	0.3937	0.196	-0.032	0.397	57.44	0.524	0.529	292	304	-0.564145	0.065789	0.31453	-0.14353	25.7675	23.0263	21.3816	29.8246	52.8509	47.1491	58.8816	45.3947	52.1382	54.2763	52.3973	potato
KC129093_2011_Iran_potato	0.3012	0.253	0.2641	0.4208	0.184	-0.031	0.401	56.26	0.534	0.536	292	304	-0.608553	0.0625	-0.0164	0.23829	26.2061	23.136	20.1754	30.4825	53.6184	46.3816	58.8816	46.7105	52.7961	55.2632	53.4247	potato
KC129092_2011_Iran_potato	0.3494	0.2651	0.2183	0.4064	0.244	0.064	0.459	53.79	0.531	0.533	292	304	-0.632895	0.0625	0.40265	0.05602	25.1096	23.5746	21.6009	29.7149	53.2895	46.7105	57.8947	47.0395	52.4671	54.9342	53.0822	potato
KC129091_2011_Iran_potato	0.3494	0.2651	0.214	0.411	0.243	0.073	0.462	54.18	0.534	0.533	292	304	-0.628619	0.0625	0.41468	0.03275	25.1096	23.5746	21.6009	29.7149	53.2895	46.7105	57.8947	46.7105	52.3026	55.2632	53.4247	potato
KC129090_2011_Iran_potato	0.3052	0.253	0.2609	0.4227	0.185	-0.033	0.401	55.93	0.534	0.536	292	304	-0.625658	0.0625	-0.01042	0.24467	26.2061	23.2456	20.1754	30.3728	53.6184	46.3816	58.8816	46.7105	52.7961	55.2632	53.4247	potato
KC129089_2011_Iran_potato	0.3024	0.254	0.2641	0.4208	0.186	-0.031	0.401	56.32	0.534	0.535	292	304	-0.61875	0.0625	-0.01533	0.23364	26.3158	23.136	20.1754	30.3728	53.5088	46.4912	58.8816	46.3816	52.6316	55.2632	53.4247	potato
KC129088_2011_Iran_potato	0.3534	0.261	0.2183	0.4064	0.244	0.066	0.459	54.21	0.527	0.53	292	304	-0.625987	0.0625	0.43873	0.0618	25.2193	23.3553	21.8202	29.6053	52.9605	47.0395	57.5658	46.7105	52.1382	54.6053	52.7397	potato
KC129087_2011_Iran_potato	0.3494	0.2651	0.2183	0.4064	0.246	0.071	0.462	54.21	0.531	0.531	292	304	-0.625987	0.0625	0.4111	0.04127	25.2193	23.4649	21.7105	29.6053	53.0702	46.9298	57.5658	46.7105	52.1382	54.9342	53.0822	potato
KC129086_2011_Iran_potato	0.3024	0.254	0.2641	0.4208	0.186	-0.031	0.401	56.32	0.534	0.535	292	304	-0.61875	0.0625	-0.01533	0.23364	26.3158	23.136	20.1754	30.3728	53.5088	46.4912	58.8816	46.3816	52.6316	55.2632	53.4247	potato
EF063389_2006_Canada_pota	0.3105	0.2782	0.303	0.3408	0.207	0.006	0.425	59.69	0.497	0.523	292	304	-0.549342	0.065789	0.27809	-0.17428	26.9737	23.5746	20.7237	28.7281	52.3026	47.6974	58.8816	46.3816	52.6316	51.6447	49.6575	potato
EF063388_2006_Canada_pota	0.3173	0.2771	0.3	0.3378	0.206	0.009	0.425	59.79	0.493	0.524	292	304	-0.564145	0.065789	0.28456	-0.19277	26.864	23.6842	20.7237	28.7281	52.4123	47.5877	59.5395	46.3816	52.9605	51.3158	49.3151	potato
EF063387_2006_Canada_pota	0.3024	0.2782	0.2895	0.3665	0.204	0.022	0.433	55.85	0.515	0.529	291	304	-0.575658	0.065789	0.2801	-0.13331	26.7544	23.5746	20.3947	29.2763	52.8509	47.1491	58.8816	46.0526	52.4671	53.6184	51.5464	potato
EF063386_2006_Canada_pota	0.2972	0.2811	0.2926	0.3665	0.202	0.027	0.435	56.05	0.517	0.529	292	304	-0.575987	0.065789	0.26043	-0.16319	26.864	23.5746	20.2851	29.2763	52.8509	47.1491	58.8816	46.0526	52.4671	53.6184	51.7123	potato
EF063385_2006_Canada_pota	0.2932	0.2851	0.2838	0.3756	0.203	0.031	0.438	56.35	0.527	0.533	292	304	-0.583882	0.065789	0.25831	-0.1636	26.6447	23.7939	20.0658	29.4956	53.2895	46.7105	58.8816	46.3816	52.6316	54.6053	52.7397	potato
EF063384_2006_Canada_pota	0.3145	0.2782	0.2895	0.3529	0.212	0.01	0.426	59.85	0.505	0.527	291	304	-0.568421	0.065789	0.26393	-0.16833	26.6447	23.6842	20.614	29.057	52.7412	47.2588	59.5395	46.0526	52.7961	52.6316	50.5155	potato
EF063383_2006_Canada_pota	0.3173	0.2811	0.2957	0.3378	0.209	0.015	0.428	59.49	0.497	0.525	292	304	-0.563816	0.065789	0.27324	-0.18594	26.864	23.7939	20.614	28.7281	52.5219	47.4781	59.5395	46.3816	52.9605	51.6447	49.6575	potato
KJ919966_2013_India_potat	0.3401	0.2753	0.2675	0.3578	0.227	0.128	0.495	51.56	0.502	0.515	291	304	-0.616118	0.065789	0.30189	-0.12528	26.864	23.136	21.6009	28.3991	51.5351	48.4649	56.25	46.0526	51.1513	52.3026	50.1718	potato
KJ919965_2013_India_potat	0.2863	0.2661	0.29	0.4	0.182	-0.023	0.408	56.95	0.527	0.534	292	304	-0.633553	0.0625	0.04099	0.11844	27.0833	23.6842	19.5175	29.7149	53.3991	46.6009	58.5526	47.0395	52.7961	54.6053	52.7397	potato
KJ919964_2013_India_potat	0.2863	0.2661	0.29	0.4	0.182	-0.023	0.408	56.95	0.527	0.534	292	304	-0.633553	0.0625	0.04099	0.11844	27.0833	23.6842	19.5175	29.7149	53.3991	46.6009	58.5526	47.0395	52.7961	54.6053	52.7397	potato
KJ462137_2013_India_potat	0.2702	0.2782	0.29	0.4045	0.179	-0.029	0.404	57.3	0.541	0.538	292	304	-0.633553	0.0625	0.04431	0.11786	27.0833	24.0132	19.0789	29.8246	53.8377	46.1623	58.5526	47.0395	52.7961	55.9211	54.1096	potato
KJ462136_2013_India_potat	0.2742	0.2742	0.29	0.4045	0.178	-0.035	0.401	57.28	0.538	0.537	292	304	-0.633553	0.0625	0.04247	0.11692	27.0833	23.9035	19.1886	29.8246	53.7281	46.2719	58.5526	47.0395	52.7961	55.5921	53.7671	potato
KJ462135_2013_India_potat	0.2742	0.2742	0.29	0.4045	0.179	-0.035	0.401	57.52	0.538	0.536	292	304	-0.633553	0.0625	0.07837	0.14954	27.0833	23.7939	19.2982	29.8246	53.6184	46.3816	58.2237	47.0395	52.6316	55.5921	53.7671	potato
KJ462134_2013_India_potat	0.2764	0.2683	0.2949	0.3929	0.175	-0.062	0.385	56.5	0.529	0.539	291	304	-0.627632	0.069079	0.04207	0.17418	26.5351	23.6842	19.5175	30.2632	53.9474	46.0526	58.5526	48.3553	53.4539	54.9342	52.921	potato
KJ462133_2013_India_potat	0.3522	0.2632	0.2895	0.3349	0.211	0.073	0.464	51.9	0.474	0.507	291	304	-0.639474	0.0625	0.35425	-0.13842	27.5219	22.6974	21.8202	27.9605	50.6579	49.3421	55.9211	46.3816	51.1513	49.6711	47.4227	potato
KF471070_2012_India_potat	0.2691	0.2771	0.2888	0.4009	0.18	-0.029	0.404	58.3	0.541	0.543	292	304	-0.612829	0.0625	0.03988	0.12112	26.6447	24.0132	19.0789	30.2632	54.2763	45.7237	59.2105	47.6974	53.4539	55.9211	54.1096	potato
KC866622_2011_Tanzania_po	0.3024	0.2581	0.2641	0.4182	0.188	-0.005	0.418	55.86	0.534	0.535	292	304	-0.641776	0.0625	0.01899	0.15706	26.5351	23.4649	19.9561	30.0439	53.5088	46.4912	58.2237	47.0395	52.6316	55.2632	53.4247	potato
KY364848_2016_China_potat	0.3293	0.2927	0.2402	0.379	0.232	0.123	0.491	51.47	0.533	0.525	291	304	-0.608224	0.0625	0.31187	-0.10612	26.2061	23.4649	21.2719	29.057	52.5219	47.4781	56.5789	45.7237	51.1513	55.2632	53.2646	potato
MH558037_2018_Slovakia_to	0.304	0.26	0.2609	0.4155	0.187	0.001	0.421	56.82	0.534	0.536	292	304	-0.635855	0.0625	0.02417	0.18062	26.3158	23.5746	20.0658	30.0439	53.6184	46.3816	58.2237	47.3684	52.7961	55.2632	53.4247	tomato
MH558036_2018_Slovakia_to	0.292	0.264	0.2727	0.4091	0.183	0.002	0.421	56.46	0.534	0.538	292	304	-0.638816	0.0625	0.01646	0.10672	26.4254	23.6842	19.7368	30.1535	53.8377	46.1623	58.5526	47.6974	53.125	55.2632	53.4247	tomato
MG356509_2015_Bangladesh_	0.2984	0.3145	0.2795	0.347	0.226	0.072	0.459	60.63	0.527	0.522	292	304	-0.598355	0.0625	0.34078	0.08379	26.9737	23.7939	20.8333	28.3991	52.193	47.807	57.2368	44.7368	50.9868	54.6053	52.7397	potato
MG356508_2015_Bangladesh_	0.2984	0.3145	0.2795	0.347	0.226	0.072	0.459	60.63	0.527	0.522	292	304	-0.598355	0.0625	0.34078	0.08379	26.9737	23.7939	20.8333	28.3991	52.193	47.807	57.2368	44.7368	50.9868	54.6053	52.7397	potato
Average	0.296462	0.266098	0.274411	0.402493	0.191101	-0.0107785	0.413611	54.9116	0.530289	0.534235	291.966	304	-0.613867	0.0627207	-2.68456e-07	-6.71141e-07	26.6337	23.5613	19.9407	29.8643	53.4256	46.5744	58.4665	46.9225	52.6945	54.8878	53.028
Standard deviation	0.0184791	0.0102155	0.0189395	0.0202092	0.0156342	0.0367681	0.0214925	2.2829	0.01313	0.00569185	0.337241	0	0.0190507	0.00112547	0.155028	0.119073	0.543595	0.247463	0.643919	0.533255	0.575803	0.575803	0.613496	0.645638	0.452695	1.24088	1.31048
title	T3s	C3s	A3s	G3s	CAI	CBI	Fop	Nc	GC3s	GC	L_sym	L_aa	Gravy	Aromo	Axis1	Axis2	%A	%C	%T	%G	%G+C	%A+T	%G1+C1	%G2+C2	%GC12	%G3+C3	%G3s+C3s	orign
