# Supplementary material for: Analysis of Synonymous Codon Usage Bias in Potato Virus M and Its Adaption to Hosts
Source: Viruses. 2019 Aug 14;11(8):752. doi: 10.3390/v11080752 (PMC6722529; doi:10.3390/v11080752)
Supplement: Supplementary file 1 [file viruses-11-00752-s001.zip › Table S3-NABP-codonW-v2-190710.xlsx]

## Sheet: Sheet1
title	T3s	C3s	A3s	G3s	CAI	CBI	Fop	Nc	GC3s	GC	L_sym	L_aa	Gravy	Aromo	Axis1	Axis2	%A	%C	%T	%G	%G+C	%A+T	%G1+C1	%G2+C2	%GC12	%G3+C3	%G3s+C3s	Origin
p77KF561668_2011_Yunnan_p	0.5	0.1489	0.2651	0.2973	0.191	-0.061	0.381	47.87	0.343	0.454	105	108	-0.030556	0.083333	-0.15588	0.04733	24.0741	18.2099	30.5556	27.1605	45.3704	54.6296	48.1481	51.8519	50	36.1111	34.2857	pepino
p78KF561667_2011_Yunnan_p	0.5	0.1596	0.253	0.3014	0.198	-0.048	0.39	48.78	0.352	0.454	105	108	-0.024074	0.083333	-0.12334	0.03934	24.0741	18.2099	30.5556	27.1605	45.3704	54.6296	47.2222	51.8519	49.537	37.037	35.2381	pepino
p79KF561666_2011_Yunnan_p	0.4894	0.1596	0.2651	0.3014	0.19	-0.048	0.39	48.53	0.352	0.454	105	108	-0.024074	0.083333	-0.12728	0.03844	24.3827	18.2099	30.2469	27.1605	45.3704	54.6296	47.2222	51.8519	49.537	37.037	35.2381	pepino
p80KF561665_2010_Gansu_pe	0.5054	0.1505	0.2651	0.3014	0.204	-0.051	0.39	47.07	0.343	0.448	105	108	-0.018519	0.083333	-0.16252	0.06613	24.6914	17.9012	30.5556	26.8519	44.7531	55.2469	47.2222	50.9259	49.0741	36.1111	34.2857	pepino
p81KF561664_2010_Gansu_pe	0.5054	0.1505	0.2651	0.3014	0.204	-0.051	0.39	47.07	0.343	0.448	105	108	-0.018519	0.083333	-0.16252	0.06613	24.6914	17.9012	30.5556	26.8519	44.7531	55.2469	47.2222	50.9259	49.0741	36.1111	34.2857	pepino
p82KF561663_2010_Gansu_to	0.5	0.1489	0.2771	0.2877	0.194	-0.08	0.371	46.93	0.333	0.448	105	108	-0.024074	0.083333	-0.15751	0.06812	24.6914	17.9012	30.5556	26.8519	44.7531	55.2469	47.2222	51.8519	49.537	35.1852	33.3333	tomato
p83KF561662_2010_Gansu_to	0.4946	0.1613	0.2771	0.2877	0.2	-0.083	0.371	49.77	0.343	0.448	105	108	-0.014815	0.083333	-0.12513	0.0344	25	18.2099	30.2469	26.5432	44.7531	55.2469	47.2222	50.9259	49.0741	36.1111	34.2857	tomato
p84KF561661_2010_Gansu_to	0.5	0.1489	0.2771	0.2877	0.194	-0.08	0.371	46.93	0.333	0.448	105	108	-0.024074	0.083333	-0.15751	0.06812	24.6914	17.9012	30.5556	26.8519	44.7531	55.2469	47.2222	51.8519	49.537	35.1852	33.3333	tomato
p85KF561660_2011_Yunnan_p	0.5	0.1489	0.2651	0.2973	0.191	-0.061	0.381	47.87	0.343	0.454	105	108	-0.030556	0.083333	-0.15588	0.04733	24.0741	18.2099	30.5556	27.1605	45.3704	54.6296	48.1481	51.8519	50	36.1111	34.2857	pepino
p86KF561659_2011_Yunnan_p	0.5	0.1489	0.2651	0.2973	0.189	-0.061	0.381	47.87	0.343	0.457	105	108	-0.030556	0.083333	-0.06634	-0.18319	24.0741	18.5185	30.2469	27.1605	45.679	54.321	49.0741	51.8519	50.463	36.1111	34.2857	pepino
p87KF561658_2011_Yunnan_p	0.5	0.1489	0.2651	0.3014	0.193	-0.064	0.381	46.8	0.343	0.451	105	108	-0.024074	0.083333	-0.1565	0.07002	24.3827	17.9012	30.5556	27.1605	45.0617	54.9383	47.2222	51.8519	49.537	36.1111	34.2857	pepino
p88KF561657_2011_Yunnan_p	0.4787	0.1809	0.241	0.3108	0.214	-0.014	0.41	51.6	0.381	0.466	105	108	-0.026852	0.083333	-0.074	-0.02653	23.4568	18.8272	29.9383	27.7778	46.6049	53.3951	48.1481	51.8519	50	39.8148	38.0952	pepino
p89KF561656_2011_Yunnan_p	0.4787	0.1809	0.241	0.3108	0.214	-0.014	0.41	51.6	0.381	0.466	105	108	-0.026852	0.083333	-0.074	-0.02653	23.4568	18.8272	29.9383	27.7778	46.6049	53.3951	48.1481	51.8519	50	39.8148	38.0952	pepino
p90KF561655_2011_Yunnan_p	0.4787	0.1809	0.241	0.3108	0.214	-0.014	0.41	51.6	0.381	0.466	105	108	-0.026852	0.083333	-0.074	-0.02653	23.4568	18.8272	29.9383	27.7778	46.6049	53.3951	48.1481	51.8519	50	39.8148	38.0952	pepino
p91KF561654_2011_Yunnan_p	0.4792	0.1667	0.241	0.3108	0.188	-0.024	0.4	54.44	0.371	0.469	105	108	-0.041667	0.083333	-0.10836	5e-05	22.8395	18.5185	30.2469	28.3951	46.9136	53.0864	48.1481	53.7037	50.9259	38.8889	37.1429	pepino
p92KF561653_2011_Yunnan_p	0.4688	0.1771	0.2289	0.3243	0.188	-0.024	0.4	53.58	0.39	0.475	105	108	-0.041667	0.083333	-0.11745	-0.01392	22.5309	18.8272	29.9383	28.7037	47.5309	52.4691	48.1481	53.7037	50.9259	40.7407	39.0476	pepino
p93KF561652_2011_Yunnan_p	0.4792	0.1667	0.241	0.3108	0.188	-0.024	0.4	54.44	0.371	0.469	105	108	-0.041667	0.083333	-0.10836	5e-05	22.8395	18.5185	30.2469	28.3951	46.9136	53.0864	48.1481	53.7037	50.9259	38.8889	37.1429	pepino
p94KF561651_2011_Yunnan_p	0.4792	0.1667	0.241	0.3108	0.188	-0.024	0.4	54.44	0.371	0.469	105	108	-0.041667	0.083333	-0.10836	5e-05	22.8395	18.5185	30.2469	28.3951	46.9136	53.0864	48.1481	53.7037	50.9259	38.8889	37.1429	pepino
p95KF561650_2011_Yunnan_p	0.4896	0.1563	0.241	0.3108	0.186	-0.041	0.39	54.44	0.362	0.466	105	108	-0.041667	0.083333	-0.099	0.00918	22.8395	18.2099	30.5556	28.3951	46.6049	53.3951	48.1481	53.7037	50.9259	37.963	36.1905	pepino
p96KF561649_2011_Yunnan_p	0.5	0.1596	0.253	0.3014	0.205	-0.031	0.4	48.78	0.352	0.457	105	108	-0.024074	0.083333	0.00026	-0.21637	24.0741	18.5185	30.2469	27.1605	45.679	54.321	48.1481	51.8519	50	37.037	35.2381	pepino
p97KF561648_2011_Yunnan_p	0.5	0.1596	0.253	0.3014	0.198	-0.048	0.39	48.78	0.352	0.454	105	108	-0.024074	0.083333	-0.12334	0.03934	24.0741	18.2099	30.5556	27.1605	45.3704	54.6296	47.2222	51.8519	49.537	37.037	35.2381	pepino
p98KF561647_2011_Yunnan_p	0.5	0.1596	0.253	0.3014	0.193	-0.06	0.381	51.61	0.352	0.457	105	108	-0.031482	0.083333	-0.11496	0.02165	24.0741	18.5185	30.2469	27.1605	45.679	54.321	48.1481	51.8519	50	37.037	35.2381	pepino
p99KF561646_2011_Yunnan_p	0.4894	0.1702	0.241	0.3151	0.199	-0.031	0.4	48.35	0.371	0.46	105	108	-0.024074	0.083333	-0.12472	0.03713	23.7654	18.5185	30.2469	27.4691	45.9877	54.0123	47.2222	51.8519	49.537	38.8889	37.1429	pepino
p100KF561645_2011_Yunnan_	0.5	0.1596	0.253	0.3014	0.198	-0.048	0.39	48.78	0.352	0.454	105	108	-0.024074	0.083333	-0.12334	0.03934	24.0741	18.2099	30.5556	27.1605	45.3704	54.6296	47.2222	51.8519	49.537	37.037	35.2381	pepino
p101KF561644_2011_Yunnan_	0.4894	0.1596	0.2651	0.3014	0.19	-0.048	0.39	48.53	0.352	0.454	105	108	-0.024074	0.083333	-0.12728	0.03844	24.3827	18.2099	30.2469	27.1605	45.3704	54.6296	47.2222	51.8519	49.537	37.037	35.2381	pepino
p102KF561643_2011_Yunnan_	0.4894	0.1702	0.241	0.3151	0.199	-0.031	0.4	48.35	0.371	0.46	105	108	-0.024074	0.083333	-0.12472	0.03713	23.7654	18.5185	30.2469	27.4691	45.9877	54.0123	47.2222	51.8519	49.537	38.8889	37.1429	pepino
p103KF561642_2011_Yunnan_	0.4787	0.1809	0.253	0.3014	0.197	-0.048	0.39	49.74	0.371	0.46	105	108	-0.024074	0.083333	-0.1242	0.04738	24.0741	18.8272	29.9383	27.1605	45.9877	54.0123	47.2222	51.8519	49.537	38.8889	37.1429	pepino
p104KF561641_2010_Gansu_p	0.5	0.1383	0.2892	0.2838	0.188	-0.067	0.381	46.58	0.324	0.448	105	108	-0.072222	0.083333	-0.14679	0.08301	25	17.9012	30.2469	26.8519	44.7531	55.2469	47.2222	52.7778	50	34.2593	32.381	pepino
p105KF561640_2010_Gansu_p	0.5106	0.1383	0.2771	0.2877	0.191	-0.097	0.362	46.93	0.324	0.444	105	108	-0.024074	0.083333	-0.14616	0.08329	24.6914	17.5926	30.8642	26.8519	44.4444	55.5556	47.2222	51.8519	49.537	34.2593	32.381	pepino
p106KF561639_2010_Gansu_p	0.5054	0.1505	0.2651	0.3014	0.204	-0.051	0.39	47.07	0.343	0.448	105	108	-0.018519	0.083333	-0.16252	0.06613	24.6914	17.9012	30.5556	26.8519	44.7531	55.2469	47.2222	50.9259	49.0741	36.1111	34.2857	pepino
p107KF561638_2010_Gansu_p	0.5054	0.1505	0.2651	0.3014	0.204	-0.051	0.39	47.07	0.343	0.448	105	108	-0.018519	0.083333	-0.16252	0.06613	24.6914	17.9012	30.5556	26.8519	44.7531	55.2469	47.2222	50.9259	49.0741	36.1111	34.2857	pepino
p108KF561637_2010_Gansu_p	0.5	0.1383	0.2892	0.2877	0.184	-0.097	0.362	46.69	0.324	0.444	105	108	-0.024074	0.083333	-0.1501	0.08239	25	17.5926	30.5556	26.8519	44.4444	55.5556	47.2222	51.8519	49.537	34.2593	32.381	pepino
p109KF561636_2010_Gansu_p	0.5	0.1489	0.2651	0.3014	0.193	-0.064	0.381	46.8	0.343	0.451	105	108	-0.024074	0.083333	-0.1565	0.07002	24.3827	17.9012	30.5556	27.1605	45.0617	54.9383	47.2222	51.8519	49.537	36.1111	34.2857	pepino
p110KF561635_2010_Gansu_p	0.5	0.1489	0.2651	0.3056	0.19	-0.078	0.371	46.91	0.343	0.448	105	108	0.024074	0.083333	-0.15502	0.06957	24.3827	17.5926	30.8642	27.1605	44.7531	55.2469	47.2222	50.9259	49.0741	36.1111	34.2857	pepino
p111KF561634_2010_Gansu_p	0.5	0.1489	0.2651	0.3056	0.19	-0.078	0.371	46.91	0.343	0.448	105	108	0.024074	0.083333	-0.15502	0.06957	24.3827	17.5926	30.8642	27.1605	44.7531	55.2469	47.2222	50.9259	49.0741	36.1111	34.2857	pepino
p112KF561633_2010_Gansu_p	0.4839	0.172	0.2651	0.3014	0.203	-0.051	0.39	52.83	0.362	0.454	105	108	-0.018519	0.083333	-0.06002	0.02426	24.6914	18.5185	29.9383	26.8519	45.3704	54.6296	47.2222	50.9259	49.0741	37.963	36.1905	pepino
p113KF561632_2010_Gansu_p	0.5	0.1489	0.2651	0.3014	0.193	-0.064	0.381	46.8	0.343	0.451	105	108	-0.024074	0.083333	-0.1565	0.07002	24.3827	17.9012	30.5556	27.1605	45.0617	54.9383	47.2222	51.8519	49.537	36.1111	34.2857	pepino
p114KF561631_2010_Gansu_p	0.4839	0.172	0.2651	0.3014	0.203	-0.051	0.39	52.83	0.362	0.454	105	108	-0.018519	0.083333	-0.06002	0.02426	24.6914	18.5185	29.9383	26.8519	45.3704	54.6296	47.2222	50.9259	49.0741	37.963	36.1905	pepino
p115KF561630_2010_Gansu_p	0.4947	0.1474	0.2651	0.3014	0.185	-0.061	0.381	46.55	0.343	0.454	105	108	-0.02963	0.083333	-0.15962	0.07024	24.0741	17.9012	30.5556	27.4691	45.3704	54.6296	47.2222	52.7778	50	36.1111	34.2857	pepino
p116KF561629_2010_Gansu_p	0.4894	0.1596	0.2651	0.3014	0.191	-0.064	0.381	46.96	0.352	0.457	105	108	-0.000926	0.083333	-0.1602	0.08408	24.0741	18.2099	30.2469	27.4691	45.679	54.321	48.1481	51.8519	50	37.037	35.2381	pepino
p117KF561628_2010_Gansu_p	0.5	0.1489	0.2651	0.3014	0.192	-0.076	0.371	46.35	0.343	0.448	105	108	-0.001852	0.083333	-0.16129	0.0668	24.3827	17.5926	30.8642	27.1605	44.7531	55.2469	47.2222	50.9259	49.0741	36.1111	34.2857	pepino
p118KF561627_2010_Gansu_p	0.5106	0.1489	0.253	0.3014	0.192	-0.064	0.381	46.26	0.343	0.451	105	108	-0.024074	0.083333	-0.15024	0.05874	24.0741	17.9012	30.8642	27.1605	45.0617	54.9383	47.2222	51.8519	49.537	36.1111	34.2857	pepino
p119KF561626_2010_Gansu_p	0.5054	0.1505	0.2683	0.2917	0.193	-0.061	0.385	47.06	0.337	0.448	104	108	-0.04537	0.083333	-0.15487	0.07019	24.6914	17.9012	30.5556	26.8519	44.7531	55.2469	46.2963	51.8519	49.0741	36.1111	33.6538	pepino
p120KF561625_2010_Gansu_p	0.5	0.1489	0.2651	0.3014	0.193	-0.064	0.381	46.8	0.343	0.451	105	108	-0.024074	0.083333	-0.1565	0.07002	24.3827	17.9012	30.5556	27.1605	45.0617	54.9383	47.2222	51.8519	49.537	36.1111	34.2857	pepino
p121KF561624_2010_Gansu_p	0.5	0.1489	0.2651	0.3014	0.193	-0.064	0.381	46.8	0.343	0.451	105	108	-0.024074	0.083333	-0.1565	0.07002	24.3827	17.9012	30.5556	27.1605	45.0617	54.9383	47.2222	51.8519	49.537	36.1111	34.2857	pepino
p122KF561623_2010_Gansu_p	0.4947	0.1474	0.253	0.3151	0.186	-0.061	0.381	47.79	0.352	0.457	105	108	-0.033333	0.083333	-0.16182	0.06143	23.7654	17.9012	30.5556	27.7778	45.679	54.321	47.2222	52.7778	50	37.037	35.2381	pepino
p123KF561622_2010_Gansu_p	0.4947	0.1474	0.253	0.3151	0.186	-0.061	0.381	47.79	0.352	0.457	105	108	-0.033333	0.083333	-0.16182	0.06143	23.7654	17.9012	30.5556	27.7778	45.679	54.321	47.2222	52.7778	50	37.037	35.2381	pepino
p124KF561621_2010_Gansu_p	0.4947	0.1474	0.253	0.3151	0.186	-0.061	0.381	47.79	0.352	0.457	105	108	-0.033333	0.083333	-0.16182	0.06143	23.7654	17.9012	30.5556	27.7778	45.679	54.321	47.2222	52.7778	50	37.037	35.2381	pepino
p125KF561620_2011_Jilin_p	0.5	0.1489	0.2805	0.2917	0.189	-0.101	0.362	48.42	0.333	0.451	105	108	-0.027778	0.092593	-0.15423	0.08148	24.6914	17.9012	30.2469	27.1605	45.0617	54.9383	48.1481	51.8519	50	35.1852	33.3333	pepino
p126KF561619_2011_Jilin_p	0.5	0.1489	0.2805	0.2917	0.188	-0.08	0.371	43.72	0.333	0.448	105	108	-0.005556	0.092593	-0.15965	0.09691	24.6914	17.5926	30.5556	27.1605	44.7531	55.2469	48.1481	50.9259	49.537	35.1852	33.3333	pepino
p127KF561618_2011_Jilin_p	0.5106	0.1383	0.2805	0.2917	0.184	-0.103	0.362	46.67	0.324	0.448	105	108	-0.048148	0.092593	-0.01826	0.11624	24.6914	17.5926	30.5556	27.1605	44.7531	55.2469	48.1481	51.8519	50	34.2593	32.381	pepino
p128KF561617_2011_Jilin_p	0.5106	0.1383	0.2805	0.2917	0.185	-0.097	0.362	43.72	0.324	0.444	105	108	-0.005556	0.092593	-0.16254	0.10021	24.6914	17.284	30.8642	27.1605	44.4444	55.5556	48.1481	50.9259	49.537	34.2593	32.381	pepino
p129KF561616_2011_Jilin_p	0.5106	0.1383	0.2805	0.2917	0.185	-0.097	0.362	43.72	0.324	0.444	105	108	-0.005556	0.092593	-0.16254	0.10021	24.6914	17.284	30.8642	27.1605	44.4444	55.5556	48.1481	50.9259	49.537	34.2593	32.381	pepino
p130KF561615_2011_Jilin_p	0.5106	0.1383	0.2805	0.2917	0.185	-0.097	0.362	43.72	0.324	0.444	105	108	-0.005556	0.092593	-0.16254	0.10021	24.6914	17.284	30.8642	27.1605	44.4444	55.5556	48.1481	50.9259	49.537	34.2593	32.381	pepino
p131KF561614_2011_Jilin_p	0.5106	0.1383	0.2805	0.2917	0.185	-0.097	0.362	43.72	0.324	0.444	105	108	-0.005556	0.092593	-0.16254	0.10021	24.6914	17.284	30.8642	27.1605	44.4444	55.5556	48.1481	50.9259	49.537	34.2593	32.381	pepino
p132KF561613_2011_Jilin_p	0.5106	0.1489	0.2683	0.2917	0.193	-0.085	0.371	45.91	0.333	0.451	105	108	-0.027778	0.092593	-0.1519	0.09819	24.3827	17.9012	30.5556	27.1605	45.0617	54.9383	48.1481	51.8519	50	35.1852	33.3333	pepino
p133KF561612_2011_Jilin_p	0.5	0.1489	0.2805	0.2917	0.189	-0.097	0.362	48.24	0.333	0.448	105	108	-0.005556	0.092593	-0.14628	0.08428	24.6914	17.5926	30.5556	27.1605	44.7531	55.2469	48.1481	50.9259	49.537	35.1852	33.3333	pepino
p134KF561611_2011_Jilin_p	0.5	0.1489	0.2683	0.3056	0.188	-0.097	0.362	48.24	0.343	0.451	105	108	-0.005556	0.092593	-0.14578	0.08716	24.3827	17.5926	30.5556	27.4691	45.0617	54.9383	48.1481	50.9259	49.537	36.1111	34.2857	pepino
p135KF561610_2011_Jilin_p	0.4894	0.1489	0.2716	0.3239	0.182	-0.08	0.371	47.85	0.352	0.451	105	108	-0.030556	0.092593	-0.07031	0.16316	24.6914	17.5926	30.2469	27.4691	45.0617	54.9383	48.1481	50	49.0741	37.037	35.2381	pepino
p136KF561609_2011_Jilin_p	0.4894	0.1489	0.2716	0.3239	0.182	-0.08	0.371	47.85	0.352	0.451	105	108	-0.030556	0.092593	-0.07031	0.16316	24.6914	17.5926	30.2469	27.4691	45.0617	54.9383	48.1481	50	49.0741	37.037	35.2381	pepino
p137KF561608_2011_Jilin_p	0.4894	0.1489	0.2805	0.3056	0.18	-0.097	0.362	47.71	0.343	0.454	105	108	-0.023148	0.083333	-0.16297	0.0774	24.6914	17.9012	29.9383	27.4691	45.3704	54.6296	49.0741	50.9259	50	36.1111	34.2857	pepino
p138KF561607_2011_Jilin_p	0.4894	0.1489	0.2716	0.3239	0.182	-0.08	0.371	47.85	0.352	0.451	105	108	-0.030556	0.092593	-0.07031	0.16316	24.6914	17.5926	30.2469	27.4691	45.0617	54.9383	48.1481	50	49.0741	37.037	35.2381	pepino
p139KF561606_2011_Jilin_p	0.4894	0.1489	0.2805	0.3056	0.18	-0.097	0.362	47.71	0.343	0.454	105	108	-0.023148	0.083333	-0.16297	0.0774	24.6914	17.9012	29.9383	27.4691	45.3704	54.6296	49.0741	50.9259	50	36.1111	34.2857	pepino
p140KF561605_2011_Jilin_p	0.5	0.1489	0.2683	0.3056	0.187	-0.097	0.362	47.96	0.343	0.451	105	108	-0.005556	0.092593	-0.15803	0.08133	24.3827	17.5926	30.5556	27.4691	45.0617	54.9383	48.1481	50.9259	49.537	36.1111	34.2857	pepino
p141KF561604_2011_Jilin_p	0.5	0.1489	0.2683	0.3056	0.187	-0.097	0.362	47.96	0.343	0.451	105	108	-0.005556	0.092593	-0.15803	0.08133	24.3827	17.5926	30.5556	27.4691	45.0617	54.9383	48.1481	50.9259	49.537	36.1111	34.2857	pepino
p142KF561603_2011_Jilin_p	0.4894	0.1596	0.2683	0.3056	0.184	-0.097	0.362	47.96	0.352	0.454	105	108	-0.005556	0.092593	-0.16658	0.08253	24.3827	17.9012	30.2469	27.4691	45.3704	54.6296	48.1481	50.9259	49.537	37.037	35.2381	pepino
p143KF561602_2011_Jilin_p	0.5	0.1489	0.2683	0.3056	0.187	-0.097	0.362	47.96	0.343	0.451	105	108	-0.005556	0.092593	-0.15803	0.08133	24.3827	17.5926	30.5556	27.4691	45.0617	54.9383	48.1481	50.9259	49.537	36.1111	34.2857	pepino
p144KF561601_2011_Jilin_p	0.5	0.1489	0.2683	0.3056	0.187	-0.097	0.362	47.96	0.343	0.451	105	108	-0.005556	0.092593	-0.15803	0.08133	24.3827	17.5926	30.5556	27.4691	45.0617	54.9383	48.1481	50.9259	49.537	36.1111	34.2857	pepino
p145KF561600_2011_Jilin_p	0.5	0.1489	0.2683	0.3056	0.187	-0.097	0.362	47.96	0.343	0.451	105	108	-0.005556	0.092593	-0.15803	0.08133	24.3827	17.5926	30.5556	27.4691	45.0617	54.9383	48.1481	50.9259	49.537	36.1111	34.2857	pepino
p146KF561599_2011_Jilin_p	0.5	0.1489	0.2805	0.2917	0.181	-0.113	0.352	44.02	0.333	0.448	105	108	-0.005556	0.092593	-0.16595	0.11051	24.6914	17.5926	30.5556	27.1605	44.7531	55.2469	48.1481	50.9259	49.537	35.1852	33.3333	pepino
p147KF561598_2011_Jilin_p	0.5	0.1489	0.2561	0.3194	0.189	-0.08	0.371	47.27	0.352	0.451	105	108	-0.028704	0.092593	-0.15098	0.07186	24.3827	17.5926	30.5556	27.4691	45.0617	54.9383	47.2222	50.9259	49.0741	37.037	35.2381	pepino
p148KF561597_2011_Jilin_p	0.5	0.1489	0.2683	0.3056	0.187	-0.097	0.362	47.96	0.343	0.451	105	108	-0.005556	0.092593	-0.15803	0.08133	24.3827	17.5926	30.5556	27.4691	45.0617	54.9383	48.1481	50.9259	49.537	36.1111	34.2857	pepino
p149KF561596_2011_Jilin_p	0.4894	0.1489	0.2927	0.2917	0.188	-0.097	0.362	47.81	0.333	0.454	105	108	-0.023148	0.083333	-0.04029	-0.18004	25	18.2099	29.6296	27.1605	45.3704	54.6296	50	50.9259	50.463	35.1852	33.3333	pepino
p150KF561595_2011_Jilin_p	0.4894	0.1489	0.2927	0.2917	0.188	-0.097	0.362	47.81	0.333	0.454	105	108	-0.023148	0.083333	-0.04029	-0.18004	25	18.2099	29.6296	27.1605	45.3704	54.6296	50	50.9259	50.463	35.1852	33.3333	pepino
p151KF561594_2011_Jilin_p	0.5269	0.1398	0.2683	0.2917	0.198	-0.116	0.352	45.28	0.324	0.444	105	108	0.023148	0.092593	-0.15851	0.09522	24.3827	17.284	31.1728	27.1605	44.4444	55.5556	49.0741	50	49.537	34.2593	32.381	pepino
p152KF561593_2011_Jilin_p	0.4894	0.1489	0.2927	0.2917	0.188	-0.097	0.362	47.81	0.333	0.454	105	108	-0.023148	0.083333	-0.04029	-0.18004	25	18.2099	29.6296	27.1605	45.3704	54.6296	50	50.9259	50.463	35.1852	33.3333	pepino
p153KF561592_2011_Jilin_p	0.4894	0.1489	0.2927	0.2917	0.188	-0.097	0.362	47.81	0.333	0.454	105	108	-0.023148	0.083333	-0.04029	-0.18004	25	18.2099	29.6296	27.1605	45.3704	54.6296	50	50.9259	50.463	35.1852	33.3333	pepino
p154KF561591_2011_Qinghai	0.5054	0.1505	0.2593	0.2917	0.194	-0.053	0.388	48.9	0.34	0.454	103	108	-0.078704	0.083333	-0.15265	0.06039	24.0741	17.9012	30.5556	27.4691	45.3704	54.6296	46.2963	52.7778	49.537	37.037	33.9806	pepino
p156KF561590_2011_Qinghai	0.5053	0.1368	0.2651	0.3014	0.185	-0.078	0.371	48.5	0.333	0.451	105	108	-0.033333	0.083333	-0.14619	0.07552	24.0741	17.5926	30.8642	27.4691	45.0617	54.9383	47.2222	52.7778	50	35.1852	33.3333	pepino
p157KF561589_2011_Qinghai	0.5	0.1489	0.2651	0.3014	0.193	-0.064	0.381	46.8	0.343	0.451	105	108	-0.024074	0.083333	-0.1565	0.07002	24.3827	17.9012	30.5556	27.1605	45.0617	54.9383	47.2222	51.8519	49.537	36.1111	34.2857	pepino
p158KF561588_2011_Qinghai	0.5	0.1489	0.2651	0.3014	0.195	-0.052	0.39	47.17	0.343	0.454	105	108	-0.046296	0.083333	-0.15204	0.07271	24.3827	18.2099	30.2469	27.1605	45.3704	54.6296	47.2222	52.7778	50	36.1111	34.2857	pepino
p159KF561587_2011_Qinghai	0.5	0.1489	0.2651	0.3014	0.198	-0.048	0.39	45.5	0.343	0.454	105	108	-0.02037	0.083333	-0.15765	0.0757	24.0741	17.9012	30.5556	27.4691	45.3704	54.6296	48.1481	51.8519	50	36.1111	34.2857	pepino
p160KF561586_2011_Qinghai	0.5	0.1489	0.2651	0.3014	0.193	-0.064	0.381	46.8	0.343	0.451	105	108	-0.024074	0.083333	-0.1565	0.07002	24.3827	17.9012	30.5556	27.1605	45.0617	54.9383	47.2222	51.8519	49.537	36.1111	34.2857	pepino
p161KF561585_2011_Beijing	0.4842	0.1579	0.25	0.3108	0.185	-0.061	0.381	51.82	0.362	0.463	105	108	-0.028704	0.074074	-0.10111	-0.00328	23.4568	18.5185	30.2469	27.7778	46.2963	53.7037	47.2222	53.7037	50.463	37.963	36.1905	pepino
p162KF561584_2011_Beijing	0.5	0.1489	0.253	0.3194	0.19	-0.061	0.381	46.52	0.352	0.451	105	108	0.024074	0.083333	-0.15401	0.07148	24.0741	17.5926	30.8642	27.4691	45.0617	54.9383	47.2222	50.9259	49.0741	37.037	35.2381	pepino
p163KF561583_2011_Beijing	0.5	0.1489	0.253	0.3194	0.19	-0.061	0.381	46.52	0.352	0.451	105	108	0.024074	0.083333	-0.15401	0.07148	24.0741	17.5926	30.8642	27.4691	45.0617	54.9383	47.2222	50.9259	49.0741	37.037	35.2381	pepino
p164KF561582_2011_Beijing	0.5	0.1489	0.253	0.3194	0.191	-0.045	0.39	47.48	0.352	0.451	105	108	0.024074	0.083333	-0.08372	0.1425	24.0741	17.5926	30.8642	27.4691	45.0617	54.9383	47.2222	50.9259	49.0741	37.037	35.2381	pepino
p165KJ473993_2013_Iran_po	0.5	0.1667	0.2375	0.2973	0.192	-0.095	0.362	46.03	0.362	0.46	105	108	-0.115741	0.101852	0.40975	0.13547	22.5309	18.8272	31.4815	27.1605	45.9877	54.0123	47.2222	52.7778	50	37.963	36.1905	potato
p166KJ473992_2013_Iran_po	0.4737	0.1684	0.2651	0.2933	0.186	-0.026	0.4	58.8	0.362	0.469	105	108	-0.085185	0.092593	0.01925	-0.28474	23.1481	19.7531	29.9383	27.1605	46.9136	53.0864	50	52.7778	51.3889	37.963	36.1905	potato
p167KJ569697_2013_India_p	0.4787	0.1702	0.253	0.3067	0.198	-0.042	0.39	61	0.371	0.469	105	108	-0.040741	0.083333	0.22628	-0.27062	23.4568	19.4444	29.6296	27.4691	46.9136	53.0864	50	51.8519	50.9259	38.8889	37.1429	potato
p168KJ569696_2013_India_p	0.4792	0.1667	0.2375	0.3243	0.193	-0.106	0.352	47.55	0.381	0.472	105	108	-0.050926	0.101852	0.42677	-0.01344	21.6049	18.8272	31.1728	28.3951	47.2222	52.7778	50	51.8519	50.9259	39.8148	38.0952	potato
p169X57440_1990_German_to	0.4681	0.1915	0.2651	0.28	0.208	-0.009	0.41	61	0.371	0.466	105	108	-0.025926	0.092593	0.15713	-0.4955	23.7654	19.4444	29.6296	27.1605	46.6049	53.3951	49.0741	51.8519	50.463	38.8889	37.1429	tomato
p170NC-001361_2008_Russia	0.4574	0.2021	0.2651	0.28	0.187	-0.091	0.362	61	0.381	0.466	105	108	-0.101852	0.092593	0.28081	-0.40961	24.3827	20.0617	29.0123	26.5432	46.6049	53.3951	49.0741	50.9259	50	39.8148	38.0952	tomato
p171JX678982_2011_Iran_po	0.4787	0.1809	0.253	0.2933	0.203	-0.026	0.4	57.38	0.371	0.469	105	108	-0.040741	0.083333	0.11435	-0.357	23.4568	19.7531	29.6296	27.1605	46.9136	53.0864	50	51.8519	50.9259	38.8889	37.1429	potato
p172KJ194171_2013_Iran_po	0.4688	0.1563	0.2771	0.2933	0.179	-0.053	0.381	57.26	0.352	0.469	105	108	-0.051852	0.083333	0.12299	-0.27577	23.4568	19.1358	29.6296	27.7778	46.9136	53.0864	50	53.7037	51.8519	37.037	35.2381	potato
p173JN835299_2011_Gansu_t	0.5	0.1489	0.2771	0.2877	0.194	-0.08	0.371	46.93	0.333	0.448	105	108	-0.024074	0.083333	-0.15751	0.06812	24.6914	17.9012	30.5556	26.8519	44.7531	55.2469	47.2222	51.8519	49.537	35.1852	33.3333	tomato
p174HM854296_1985_Czech_R	0.4632	0.1684	0.2738	0.2895	0.184	-0.034	0.39	49.52	0.362	0.472	105	108	0.022222	0.083333	0.01878	-0.304	23.1481	19.4444	29.6296	27.7778	47.2222	52.7778	50.9259	52.7778	51.8519	37.963	36.1905	potato
p175AY311395_2003_Poland	0.4632	0.1789	0.2619	0.2973	0.183	-0.061	0.381	51.92	0.371	0.469	105	108	-0.066667	0.074074	-0.12996	0.03176	19.4444	29.321	27.4691	46.9136	51.2346	43.2099	62.963	47.2222	55.0926	43.5185		Un
p176AY311394_2003_Poland	0.4842	0.1579	0.253	0.3151	0.187	-0.045	0.39	49.81	0.362	0.457	105	108	-0.068519	0.092593	-0.10457	0.0215	18.2099	30.2469	27.4691	45.679	51.5432	42.284	63.8889	47.2222	55.5556	43.5185		Un
p177EU604672_2008_Germany	0.4787	0.1702	0.2651	0.2933	0.201	-0.042	0.39	58.04	0.362	0.466	105	108	-0.040741	0.083333	0.10449	-0.34159	23.7654	19.4444	29.6296	27.1605	46.6049	53.3951	50	51.8519	50.9259	37.963	36.1905	tobacco
p178AJ437481_2002_Zhejian	0.5053	0.1368	0.2651	0.3014	0.187	-0.061	0.381	47.5	0.333	0.451	105	108	-0.033333	0.083333	-0.15924	0.06446	24.0741	17.5926	30.8642	27.4691	45.0617	54.9383	47.2222	52.7778	50	35.1852	33.3333	pepino
p179KC699728_2011_Iran_po	0.4792	0.1875	0.2625	0.274	0.198	-0.054	0.381	61	0.362	0.46	105	108	-0.015741	0.083333	0.12343	-0.34093	23.4568	19.1358	30.5556	26.8519	45.9877	54.0123	50	50	50	37.963	36.1905	potato
180KC699727_2011_Iran_pot	0.4681	0.1915	0.2381	0.2987	0.186	-0.065	0.371	59.09	0.39	0.475	105	108	-0.040741	0.074074	0.32436	-0.11314	23.1481	20.3704	29.321	27.1605	47.5309	52.4691	50	51.8519	50.9259	40.7407	39.0476	potato
p181KC699726_2011_Iran_po	0.4681	0.1915	0.241	0.3026	0.211	-0.005	0.41	61	0.39	0.472	105	108	0.002778	0.083333	0.54574	-0.32348	22.8395	19.7531	29.9383	27.4691	47.2222	52.7778	50	50.9259	50.463	40.7407	39.0476	potato
p182KC699725_2011_Iran_po	0.4632	0.1789	0.2619	0.2857	0.201	-0.022	0.4	56.87	0.371	0.478	105	108	-0.023148	0.083333	0.79934	-0.51324	22.8395	20.0617	29.321	27.7778	47.8395	52.1605	50.9259	53.7037	52.3148	38.8889	37.1429	potato
p183KC699724_2011_Iran_po	0.4681	0.1915	0.253	0.2895	0.208	-0.036	0.39	55.72	0.381	0.478	105	108	-0.050926	0.083333	0.25366	-0.53068	23.1481	20.3704	29.0123	27.4691	47.8395	52.1605	51.8519	51.8519	51.8519	39.8148	38.0952	potato
p184KC699723_2011_Iran_po	0.4255	0.1702	0.253	0.3462	0.174	-0.076	0.365	54.03	0.413	0.494	104	108	-0.089815	0.092593	0.78567	0.49959	21.6049	19.4444	29.0123	29.9383	49.3827	50.6173	50.9259	53.7037	52.3148	43.5185	41.3462	potato
p185KC699722_2011_Iran_po	0.4105	0.1684	0.2771	0.3333	0.162	-0.073	0.365	54.18	0.404	0.491	104	108	-0.118519	0.092593	0.75599	0.43785	22.2222	19.4444	28.7037	29.6296	49.0741	50.9259	50	54.6296	52.3148	42.5926	40.3846	potato
p186KC699721_2011_Iran_po	0.4255	0.1702	0.253	0.3462	0.174	-0.076	0.365	54.03	0.413	0.494	104	108	-0.089815	0.092593	0.78567	0.49959	21.6049	19.4444	29.0123	29.9383	49.3827	50.6173	50.9259	53.7037	52.3148	43.5185	41.3462	potato
p187KC699720_2011_Iran_po	0.4681	0.1915	0.253	0.2895	0.213	-0.024	0.4	55.61	0.381	0.475	105	108	-0.043519	0.083333	0.24666	-0.51248	23.1481	20.0617	29.321	27.4691	47.5309	52.4691	50.9259	51.8519	51.3889	39.8148	38.0952	potato
p188KC699719_2011_Iran_po	0.4681	0.1915	0.253	0.2895	0.213	-0.024	0.4	55.61	0.381	0.475	105	108	-0.043519	0.083333	0.24666	-0.51248	23.1481	20.0617	29.321	27.4691	47.5309	52.4691	50.9259	51.8519	51.3889	39.8148	38.0952	potato
p189KC699718_2011_Iran_po	0.4681	0.1915	0.253	0.2895	0.213	-0.024	0.4	55.61	0.381	0.475	105	108	-0.043519	0.083333	0.24666	-0.51248	23.1481	20.0617	29.321	27.4691	47.5309	52.4691	50.9259	51.8519	51.3889	39.8148	38.0952	potato
p190KC699717_2011_Iran_po	0.5	0.1563	0.2051	0.3521	0.184	-0.095	0.356	47.97	0.385	0.457	104	108	-0.080556	0.092593	0.83067	0.44323	21.9136	17.5926	32.4074	28.0864	45.679	54.321	46.2963	50	48.1481	40.7407	38.4615	potato
p191KC699716_2011_Iran_po	0.5	0.1563	0.2051	0.3521	0.184	-0.095	0.356	47.97	0.385	0.457	104	108	-0.080556	0.092593	0.83067	0.44323	21.9136	17.5926	32.4074	28.0864	45.679	54.321	46.2963	50	48.1481	40.7407	38.4615	potato
p192KC699715_2011_Iran_po	0.4681	0.1915	0.253	0.2895	0.213	-0.024	0.4	55.61	0.381	0.475	105	108	-0.043519	0.083333	0.24666	-0.51248	23.1481	20.0617	29.321	27.4691	47.5309	52.4691	50.9259	51.8519	51.3889	39.8148	38.0952	potato
p198KC699714_2011_Iran_po	0.5104	0.1458	0.2025	0.3611	0.181	-0.106	0.352	46.29	0.381	0.457	105	108	-0.151852	0.101852	0.8446	0.43356	21.9136	17.284	32.4074	28.3951	45.679	54.321	46.2963	50.9259	48.6111	39.8148	38.0952	potato
p199KC699713_2011_Iran_po	0.4681	0.1915	0.253	0.2895	0.213	-0.024	0.4	55.61	0.381	0.475	105	108	-0.043519	0.083333	0.24666	-0.51248	23.1481	20.0617	29.321	27.4691	47.5309	52.4691	50.9259	51.8519	51.3889	39.8148	38.0952	potato
KY364848_2016_China_potat	0.5263	0.1474	0.2	0.3378	0.189	-0.097	0.362	44.07	0.371	0.46	105	108	-0.094444	0.101852	0.52701	0.21973	21.9136	18.2099	32.0988	27.7778	45.9877	54.0123	47.2222	51.8519	49.537	38.8889	37.1429	potato
MH558037_2018_Slovakia_to	0.4316	0.1895	0.2892	0.3014	0.181	-0.007	0.41	52.85	0.381	0.469	105	108	0.025926	0.092593	-0.04066	-0.24119	24.0741	19.4444	29.0123	27.4691	46.9136	53.0864	49.0741	51.8519	50.463	39.8148	38.0952	tomato
MH558036_2018_Slovakia_to	0.4632	0.1684	0.2892	0.2877	0.176	-0.055	0.381	51.72	0.352	0.46	105	108	0.025926	0.092593	-0.04117	-0.2528	24.0741	18.8272	29.9383	27.1605	45.9877	54.0123	49.0741	51.8519	50.463	37.037	35.2381	tomato
MG356509_2015_Bangladesh_	0.4362	0.2128	0.2405	0.3108	0.19	-0.101	0.35	51.69	0.417	0.485	103	108	-0.062037	0.111111	0.7567	0.09154	21.6049	19.7531	29.9383	28.7037	48.4568	51.5432	50.9259	50	50.463	44.4444	41.7476	potato
MG356508_2015_Bangladesh_	0.4362	0.2128	0.2405	0.3108	0.19	-0.101	0.35	51.69	0.417	0.485	103	108	-0.062037	0.111111	0.7567	0.09154	21.6049	19.7531	29.9383	28.7037	48.4568	51.5432	50.9259	50	50.463	44.4444	41.7476	potato
Average	0.489167	0.15931	0.261313	0.30332	0.191803	-0.0647623	0.378861	49.6612	0.354992	0.457943	104.902	108	-0.0299258	0.0867485	3.27869e-07	-3.27869e-07	23.8312	18.516	30.2697	27.7499	45.8612	54.0427	48.5276	51.6166	50.0721	37.4393	35.4896
Standard deviation	0.0198314	0.0169426	0.017575	0.0149953	0.00940427	0.0276794	0.0157088	4.22325	0.0213721	0.0110658	0.372834	0	0.0299557	0.00620878	0.272899	0.20789	1.09264	1.672	0.741472	2.47264	1.32485	1.84094	2.33502	1.12027	1.08782	2.31439	2.15618
title	T3s	C3s	A3s	G3s	CAI	CBI	Fop	Nc	GC3s	GC	L_sym	L_aa	Gravy	Aromo	Axis1	Axis2	%A	%C	%T	%G	%G+C	%A+T	%G1+C1	%G2+C2	%GC12	%G3+C3	%G3s+C3s	Origin

## Sheet: Sheet4
SEQUENCES \ PARAMETERS	length	A	C	T	G	%A	%C	%T	%G	%G+C	%G+A	%G+T	%A+T	%A+C	%C+T	A1	C1	T1	G1	%A1	%C1	%T1	%G1	%G1+C1	%G1+A1	%G1+T1	%A1+T1	%A1+C1	%C1+T1	A2	C2	T2	G2	%A2	%C2	%T2	%G2	%G2+C2	%G2+A2	%G2+T2	%A2+T2	%A2+C2	%C2+T2	A3	C3	T3	G3	%A3	%C3
p77KF561668	324	78	59	99	88	24.0741	18.2099	30.5556	27.1605	45.3704	51.2346	57.716	54.6296	42.284	48.7654	34	22	18	34	31.4815	16.6667	20.3704	31.4815	48.1481	62.963	51.8519	51.8519	48.1481	37.037	22	30	27	29	20.3704	25	27.7778	26.8519	51.8519	47.2222	54.6296	48.1481	45.3704	52.7778	22	47	14	25	20.3704	12.963
p78KF561667	324	78	59	99	88	24.0741	18.2099	30.5556	27.1605	45.3704	51.2346	57.716	54.6296	42.284	48.7654	35	22	17	34	32.4074	15.7407	20.3704	31.4815	47.2222	63.8889	51.8519	52.7778	48.1481	36.1111	22	30	27	29	20.3704	25	27.7778	26.8519	51.8519	47.2222	54.6296	48.1481	45.3704	52.7778	21	47	15	25	19.4444	13.8889
p79KF561666	324	79	59	98	88	24.3827	18.2099	30.2469	27.1605	45.3704	51.5432	57.4074	54.6296	42.5926	48.4568	35	22	17	34	32.4074	15.7407	20.3704	31.4815	47.2222	63.8889	51.8519	52.7778	48.1481	36.1111	22	30	27	29	20.3704	25	27.7778	26.8519	51.8519	47.2222	54.6296	48.1481	45.3704	52.7778	22	46	15	25	20.3704	13.8889
p80KF561665	324	80	58	99	87	24.6914	17.9012	30.5556	26.8519	44.7531	51.5432	57.4074	55.2469	42.5926	48.4568	35	22	17	34	32.4074	15.7407	20.3704	31.4815	47.2222	63.8889	51.8519	52.7778	48.1481	36.1111	23	30	27	28	21.2963	25	27.7778	25.9259	50.9259	47.2222	53.7037	49.0741	46.2963	52.7778	22	47	14	25	20.3704	12.963
p81KF561664	324	80	58	99	87	24.6914	17.9012	30.5556	26.8519	44.7531	51.5432	57.4074	55.2469	42.5926	48.4568	35	22	17	34	32.4074	15.7407	20.3704	31.4815	47.2222	63.8889	51.8519	52.7778	48.1481	36.1111	23	30	27	28	21.2963	25	27.7778	25.9259	50.9259	47.2222	53.7037	49.0741	46.2963	52.7778	22	47	14	25	20.3704	12.963
p82KF561663	324	80	58	99	87	24.6914	17.9012	30.5556	26.8519	44.7531	51.5432	57.4074	55.2469	42.5926	48.4568	35	22	17	34	32.4074	15.7407	20.3704	31.4815	47.2222	63.8889	51.8519	52.7778	48.1481	36.1111	22	30	27	29	20.3704	25	27.7778	26.8519	51.8519	47.2222	54.6296	48.1481	45.3704	52.7778	23	47	14	24	21.2963	12.963
p83KF561662	324	81	59	98	86	25	18.2099	30.2469	26.5432	44.7531	51.5432	56.7901	55.2469	43.2099	48.4568	35	22	17	34	32.4074	15.7407	20.3704	31.4815	47.2222	63.8889	51.8519	52.7778	48.1481	36.1111	23	30	27	28	21.2963	25	27.7778	25.9259	50.9259	47.2222	53.7037	49.0741	46.2963	52.7778	23	46	15	24	21.2963	13.8889
p84KF561661	324	80	58	99	87	24.6914	17.9012	30.5556	26.8519	44.7531	51.5432	57.4074	55.2469	42.5926	48.4568	35	22	17	34	32.4074	15.7407	20.3704	31.4815	47.2222	63.8889	51.8519	52.7778	48.1481	36.1111	22	30	27	29	20.3704	25	27.7778	26.8519	51.8519	47.2222	54.6296	48.1481	45.3704	52.7778	23	47	14	24	21.2963	12.963
p85KF561660	324	78	59	99	88	24.0741	18.2099	30.5556	27.1605	45.3704	51.2346	57.716	54.6296	42.284	48.7654	34	22	18	34	31.4815	16.6667	20.3704	31.4815	48.1481	62.963	51.8519	51.8519	48.1481	37.037	22	30	27	29	20.3704	25	27.7778	26.8519	51.8519	47.2222	54.6296	48.1481	45.3704	52.7778	22	47	14	25	20.3704	12.963
p86KF561659	324	78	60	98	88	24.0741	18.5185	30.2469	27.1605	45.679	51.2346	57.4074	54.321	42.5926	48.7654	34	21	19	34	31.4815	17.5926	19.4444	31.4815	49.0741	62.963	50.9259	50.9259	49.0741	37.037	22	30	27	29	20.3704	25	27.7778	26.8519	51.8519	47.2222	54.6296	48.1481	45.3704	52.7778	22	47	14	25	20.3704	12.963
p87KF561658	324	79	58	99	88	24.3827	17.9012	30.5556	27.1605	45.0617	51.5432	57.716	54.9383	42.284	48.4568	35	22	17	34	32.4074	15.7407	20.3704	31.4815	47.2222	63.8889	51.8519	52.7778	48.1481	36.1111	22	30	27	29	20.3704	25	27.7778	26.8519	51.8519	47.2222	54.6296	48.1481	45.3704	52.7778	22	47	14	25	20.3704	12.963
p88KF561657	324	76	61	97	90	23.4568	18.8272	29.9383	27.7778	46.6049	51.2346	57.716	53.3951	42.284	48.7654	34	22	17	35	31.4815	15.7407	20.3704	32.4074	48.1481	63.8889	52.7778	51.8519	47.2222	36.1111	22	30	27	29	20.3704	25	27.7778	26.8519	51.8519	47.2222	54.6296	48.1481	45.3704	52.7778	20	45	17	26	18.5185	15.7407
p89KF561656	324	76	61	97	90	23.4568	18.8272	29.9383	27.7778	46.6049	51.2346	57.716	53.3951	42.284	48.7654	34	22	17	35	31.4815	15.7407	20.3704	32.4074	48.1481	63.8889	52.7778	51.8519	47.2222	36.1111	22	30	27	29	20.3704	25	27.7778	26.8519	51.8519	47.2222	54.6296	48.1481	45.3704	52.7778	20	45	17	26	18.5185	15.7407
p90KF561655	324	76	61	97	90	23.4568	18.8272	29.9383	27.7778	46.6049	51.2346	57.716	53.3951	42.284	48.7654	34	22	17	35	31.4815	15.7407	20.3704	32.4074	48.1481	63.8889	52.7778	51.8519	47.2222	36.1111	22	30	27	29	20.3704	25	27.7778	26.8519	51.8519	47.2222	54.6296	48.1481	45.3704	52.7778	20	45	17	26	18.5185	15.7407
p91KF561654	324	74	60	98	92	22.8395	18.5185	30.2469	28.3951	46.9136	51.2346	58.642	53.0864	41.358	48.7654	34	22	17	35	31.4815	15.7407	20.3704	32.4074	48.1481	63.8889	52.7778	51.8519	47.2222	36.1111	20	30	27	31	18.5185	25	27.7778	28.7037	53.7037	47.2222	56.4815	46.2963	43.5185	52.7778	20	46	16	26	18.5185	14.8148
p92KF561653	324	73	61	97	93	22.5309	18.8272	29.9383	28.7037	47.5309	51.2346	58.642	52.4691	41.358	48.7654	34	22	17	35	31.4815	15.7407	20.3704	32.4074	48.1481	63.8889	52.7778	51.8519	47.2222	36.1111	20	30	27	31	18.5185	25	27.7778	28.7037	53.7037	47.2222	56.4815	46.2963	43.5185	52.7778	19	45	17	27	17.5926	15.7407
p93KF561652	324	74	60	98	92	22.8395	18.5185	30.2469	28.3951	46.9136	51.2346	58.642	53.0864	41.358	48.7654	34	22	17	35	31.4815	15.7407	20.3704	32.4074	48.1481	63.8889	52.7778	51.8519	47.2222	36.1111	20	30	27	31	18.5185	25	27.7778	28.7037	53.7037	47.2222	56.4815	46.2963	43.5185	52.7778	20	46	16	26	18.5185	14.8148
p94KF561651	324	74	60	98	92	22.8395	18.5185	30.2469	28.3951	46.9136	51.2346	58.642	53.0864	41.358	48.7654	34	22	17	35	31.4815	15.7407	20.3704	32.4074	48.1481	63.8889	52.7778	51.8519	47.2222	36.1111	20	30	27	31	18.5185	25	27.7778	28.7037	53.7037	47.2222	56.4815	46.2963	43.5185	52.7778	20	46	16	26	18.5185	14.8148
p95KF561650	324	74	59	99	92	22.8395	18.2099	30.5556	28.3951	46.6049	51.2346	58.9506	53.3951	41.0494	48.7654	34	22	17	35	31.4815	15.7407	20.3704	32.4074	48.1481	63.8889	52.7778	51.8519	47.2222	36.1111	20	30	27	31	18.5185	25	27.7778	28.7037	53.7037	47.2222	56.4815	46.2963	43.5185	52.7778	20	47	15	26	18.5185	13.8889
p96KF561649	324	78	60	98	88	24.0741	18.5185	30.2469	27.1605	45.679	51.2346	57.4074	54.321	42.5926	48.7654	35	21	18	34	32.4074	16.6667	19.4444	31.4815	48.1481	63.8889	50.9259	51.8519	49.0741	36.1111	22	30	27	29	20.3704	25	27.7778	26.8519	51.8519	47.2222	54.6296	48.1481	45.3704	52.7778	21	47	15	25	19.4444	13.8889
p97KF561648	324	78	59	99	88	24.0741	18.2099	30.5556	27.1605	45.3704	51.2346	57.716	54.6296	42.284	48.7654	35	22	17	34	32.4074	15.7407	20.3704	31.4815	47.2222	63.8889	51.8519	52.7778	48.1481	36.1111	22	30	27	29	20.3704	25	27.7778	26.8519	51.8519	47.2222	54.6296	48.1481	45.3704	52.7778	21	47	15	25	19.4444	13.8889
p98KF561647	324	78	60	98	88	24.0741	18.5185	30.2469	27.1605	45.679	51.2346	57.4074	54.321	42.5926	48.7654	35	21	18	34	32.4074	16.6667	19.4444	31.4815	48.1481	63.8889	50.9259	51.8519	49.0741	36.1111	22	30	27	29	20.3704	25	27.7778	26.8519	51.8519	47.2222	54.6296	48.1481	45.3704	52.7778	21	47	15	25	19.4444	13.8889
p99KF561646	324	77	60	98	89	23.7654	18.5185	30.2469	27.4691	45.9877	51.2346	57.716	54.0123	42.284	48.7654	35	22	17	34	32.4074	15.7407	20.3704	31.4815	47.2222	63.8889	51.8519	52.7778	48.1481	36.1111	22	30	27	29	20.3704	25	27.7778	26.8519	51.8519	47.2222	54.6296	48.1481	45.3704	52.7778	20	46	16	26	18.5185	14.8148
p100KF561645	324	78	59	99	88	24.0741	18.2099	30.5556	27.1605	45.3704	51.2346	57.716	54.6296	42.284	48.7654	35	22	17	34	32.4074	15.7407	20.3704	31.4815	47.2222	63.8889	51.8519	52.7778	48.1481	36.1111	22	30	27	29	20.3704	25	27.7778	26.8519	51.8519	47.2222	54.6296	48.1481	45.3704	52.7778	21	47	15	25	19.4444	13.8889
p101KF561644	324	79	59	98	88	24.3827	18.2099	30.2469	27.1605	45.3704	51.5432	57.4074	54.6296	42.5926	48.4568	35	22	17	34	32.4074	15.7407	20.3704	31.4815	47.2222	63.8889	51.8519	52.7778	48.1481	36.1111	22	30	27	29	20.3704	25	27.7778	26.8519	51.8519	47.2222	54.6296	48.1481	45.3704	52.7778	22	46	15	25	20.3704	13.8889
p102KF561643	324	77	60	98	89	23.7654	18.5185	30.2469	27.4691	45.9877	51.2346	57.716	54.0123	42.284	48.7654	35	22	17	34	32.4074	15.7407	20.3704	31.4815	47.2222	63.8889	51.8519	52.7778	48.1481	36.1111	22	30	27	29	20.3704	25	27.7778	26.8519	51.8519	47.2222	54.6296	48.1481	45.3704	52.7778	20	46	16	26	18.5185	14.8148
p103KF561642	324	78	61	97	88	24.0741	18.8272	29.9383	27.1605	45.9877	51.2346	57.0988	54.0123	42.9012	48.7654	35	22	17	34	32.4074	15.7407	20.3704	31.4815	47.2222	63.8889	51.8519	52.7778	48.1481	36.1111	22	30	27	29	20.3704	25	27.7778	26.8519	51.8519	47.2222	54.6296	48.1481	45.3704	52.7778	21	45	17	25	19.4444	15.7407
p104KF561641	324	81	58	98	87	25	17.9012	30.2469	26.8519	44.7531	51.8519	57.0988	55.2469	42.9012	48.1481	35	22	17	34	32.4074	15.7407	20.3704	31.4815	47.2222	63.8889	51.8519	52.7778	48.1481	36.1111	22	29	28	29	20.3704	25.9259	26.8519	26.8519	52.7778	47.2222	53.7037	47.2222	46.2963	52.7778	24	47	13	24	22.2222	12.037
p105KF561640	324	80	57	100	87	24.6914	17.5926	30.8642	26.8519	44.4444	51.5432	57.716	55.5556	42.284	48.4568	35	22	17	34	32.4074	15.7407	20.3704	31.4815	47.2222	63.8889	51.8519	52.7778	48.1481	36.1111	22	30	27	29	20.3704	25	27.7778	26.8519	51.8519	47.2222	54.6296	48.1481	45.3704	52.7778	23	48	13	24	21.2963	12.037
p106KF561639	324	80	58	99	87	24.6914	17.9012	30.5556	26.8519	44.7531	51.5432	57.4074	55.2469	42.5926	48.4568	35	22	17	34	32.4074	15.7407	20.3704	31.4815	47.2222	63.8889	51.8519	52.7778	48.1481	36.1111	23	30	27	28	21.2963	25	27.7778	25.9259	50.9259	47.2222	53.7037	49.0741	46.2963	52.7778	22	47	14	25	20.3704	12.963
p107KF561638	324	80	58	99	87	24.6914	17.9012	30.5556	26.8519	44.7531	51.5432	57.4074	55.2469	42.5926	48.4568	35	22	17	34	32.4074	15.7407	20.3704	31.4815	47.2222	63.8889	51.8519	52.7778	48.1481	36.1111	23	30	27	28	21.2963	25	27.7778	25.9259	50.9259	47.2222	53.7037	49.0741	46.2963	52.7778	22	47	14	25	20.3704	12.963
p108KF561637	324	81	57	99	87	25	17.5926	30.5556	26.8519	44.4444	51.8519	57.4074	55.5556	42.5926	48.1481	35	22	17	34	32.4074	15.7407	20.3704	31.4815	47.2222	63.8889	51.8519	52.7778	48.1481	36.1111	22	30	27	29	20.3704	25	27.7778	26.8519	51.8519	47.2222	54.6296	48.1481	45.3704	52.7778	24	47	13	24	22.2222	12.037
p109KF561636	324	79	58	99	88	24.3827	17.9012	30.5556	27.1605	45.0617	51.5432	57.716	54.9383	42.284	48.4568	35	22	17	34	32.4074	15.7407	20.3704	31.4815	47.2222	63.8889	51.8519	52.7778	48.1481	36.1111	22	30	27	29	20.3704	25	27.7778	26.8519	51.8519	47.2222	54.6296	48.1481	45.3704	52.7778	22	47	14	25	20.3704	12.963
p110KF561635	324	79	57	100	88	24.3827	17.5926	30.8642	27.1605	44.7531	51.5432	58.0247	55.2469	41.9753	48.4568	35	22	17	34	32.4074	15.7407	20.3704	31.4815	47.2222	63.8889	51.8519	52.7778	48.1481	36.1111	22	31	26	29	20.3704	24.0741	28.7037	26.8519	50.9259	47.2222	55.5556	49.0741	44.4444	52.7778	22	47	14	25	20.3704	12.963
p111KF561634	324	79	57	100	88	24.3827	17.5926	30.8642	27.1605	44.7531	51.5432	58.0247	55.2469	41.9753	48.4568	35	22	17	34	32.4074	15.7407	20.3704	31.4815	47.2222	63.8889	51.8519	52.7778	48.1481	36.1111	22	31	26	29	20.3704	24.0741	28.7037	26.8519	50.9259	47.2222	55.5556	49.0741	44.4444	52.7778	22	47	14	25	20.3704	12.963
p112KF561633	324	80	60	97	87	24.6914	18.5185	29.9383	26.8519	45.3704	51.5432	56.7901	54.6296	43.2099	48.4568	35	22	17	34	32.4074	15.7407	20.3704	31.4815	47.2222	63.8889	51.8519	52.7778	48.1481	36.1111	23	30	27	28	21.2963	25	27.7778	25.9259	50.9259	47.2222	53.7037	49.0741	46.2963	52.7778	22	45	16	25	20.3704	14.8148
p113KF561632	324	79	58	99	88	24.3827	17.9012	30.5556	27.1605	45.0617	51.5432	57.716	54.9383	42.284	48.4568	35	22	17	34	32.4074	15.7407	20.3704	31.4815	47.2222	63.8889	51.8519	52.7778	48.1481	36.1111	22	30	27	29	20.3704	25	27.7778	26.8519	51.8519	47.2222	54.6296	48.1481	45.3704	52.7778	22	47	14	25	20.3704	12.963
p114KF561631	324	80	60	97	87	24.6914	18.5185	29.9383	26.8519	45.3704	51.5432	56.7901	54.6296	43.2099	48.4568	35	22	17	34	32.4074	15.7407	20.3704	31.4815	47.2222	63.8889	51.8519	52.7778	48.1481	36.1111	23	30	27	28	21.2963	25	27.7778	25.9259	50.9259	47.2222	53.7037	49.0741	46.2963	52.7778	22	45	16	25	20.3704	14.8148
p115KF561630	324	78	58	99	89	24.0741	17.9012	30.5556	27.4691	45.3704	51.5432	58.0247	54.6296	41.9753	48.4568	35	22	17	34	32.4074	15.7407	20.3704	31.4815	47.2222	63.8889	51.8519	52.7778	48.1481	36.1111	21	30	27	30	19.4444	25	27.7778	27.7778	52.7778	47.2222	55.5556	47.2222	44.4444	52.7778	22	47	14	25	20.3704	12.963
p116KF561629	324	78	59	98	89	24.0741	18.2099	30.2469	27.4691	45.679	51.5432	57.716	54.321	42.284	48.4568	34	22	17	35	31.4815	15.7407	20.3704	32.4074	48.1481	63.8889	52.7778	51.8519	47.2222	36.1111	22	30	27	29	20.3704	25	27.7778	26.8519	51.8519	47.2222	54.6296	48.1481	45.3704	52.7778	22	46	15	25	20.3704	13.8889
p117KF561628	324	79	57	100	88	24.3827	17.5926	30.8642	27.1605	44.7531	51.5432	58.0247	55.2469	41.9753	48.4568	35	22	17	34	32.4074	15.7407	20.3704	31.4815	47.2222	63.8889	51.8519	52.7778	48.1481	36.1111	22	31	26	29	20.3704	24.0741	28.7037	26.8519	50.9259	47.2222	55.5556	49.0741	44.4444	52.7778	22	47	14	25	20.3704	12.963
p118KF561627	324	78	58	100	88	24.0741	17.9012	30.8642	27.1605	45.0617	51.2346	58.0247	54.9383	41.9753	48.7654	35	22	17	34	32.4074	15.7407	20.3704	31.4815	47.2222	63.8889	51.8519	52.7778	48.1481	36.1111	22	30	27	29	20.3704	25	27.7778	26.8519	51.8519	47.2222	54.6296	48.1481	45.3704	52.7778	21	48	14	25	19.4444	12.963
p119KF561626	324	80	58	99	87	24.6914	17.9012	30.5556	26.8519	44.7531	51.5432	57.4074	55.2469	42.5926	48.4568	36	22	17	33	33.3333	15.7407	20.3704	30.5556	46.2963	63.8889	50.9259	53.7037	49.0741	36.1111	22	30	27	29	20.3704	25	27.7778	26.8519	51.8519	47.2222	54.6296	48.1481	45.3704	52.7778	22	47	14	25	20.3704	12.963
p120KF561625	324	79	58	99	88	24.3827	17.9012	30.5556	27.1605	45.0617	51.5432	57.716	54.9383	42.284	48.4568	35	22	17	34	32.4074	15.7407	20.3704	31.4815	47.2222	63.8889	51.8519	52.7778	48.1481	36.1111	22	30	27	29	20.3704	25	27.7778	26.8519	51.8519	47.2222	54.6296	48.1481	45.3704	52.7778	22	47	14	25	20.3704	12.963
p121KF561624	324	79	58	99	88	24.3827	17.9012	30.5556	27.1605	45.0617	51.5432	57.716	54.9383	42.284	48.4568	35	22	17	34	32.4074	15.7407	20.3704	31.4815	47.2222	63.8889	51.8519	52.7778	48.1481	36.1111	22	30	27	29	20.3704	25	27.7778	26.8519	51.8519	47.2222	54.6296	48.1481	45.3704	52.7778	22	47	14	25	20.3704	12.963
p122KF561623	324	77	58	99	90	23.7654	17.9012	30.5556	27.7778	45.679	51.5432	58.3333	54.321	41.6667	48.4568	35	22	17	34	32.4074	15.7407	20.3704	31.4815	47.2222	63.8889	51.8519	52.7778	48.1481	36.1111	21	30	27	30	19.4444	25	27.7778	27.7778	52.7778	47.2222	55.5556	47.2222	44.4444	52.7778	21	47	14	26	19.4444	12.963
p123KF561622	324	77	58	99	90	23.7654	17.9012	30.5556	27.7778	45.679	51.5432	58.3333	54.321	41.6667	48.4568	35	22	17	34	32.4074	15.7407	20.3704	31.4815	47.2222	63.8889	51.8519	52.7778	48.1481	36.1111	21	30	27	30	19.4444	25	27.7778	27.7778	52.7778	47.2222	55.5556	47.2222	44.4444	52.7778	21	47	14	26	19.4444	12.963
p124KF561621	324	77	58	99	90	23.7654	17.9012	30.5556	27.7778	45.679	51.5432	58.3333	54.321	41.6667	48.4568	35	22	17	34	32.4074	15.7407	20.3704	31.4815	47.2222	63.8889	51.8519	52.7778	48.1481	36.1111	21	30	27	30	19.4444	25	27.7778	27.7778	52.7778	47.2222	55.5556	47.2222	44.4444	52.7778	21	47	14	26	19.4444	12.963
p125KF561620	324	80	58	98	88	24.6914	17.9012	30.2469	27.1605	45.0617	51.8519	57.4074	54.9383	42.5926	48.1481	34	22	17	35	31.4815	15.7407	20.3704	32.4074	48.1481	63.8889	52.7778	51.8519	47.2222	36.1111	23	29	27	29	21.2963	25	26.8519	26.8519	51.8519	48.1481	53.7037	48.1481	46.2963	51.8519	23	47	14	24	21.2963	12.963
p126KF561619	324	80	57	99	88	24.6914	17.5926	30.5556	27.1605	44.7531	51.8519	57.716	55.2469	42.284	48.1481	34	22	17	35	31.4815	15.7407	20.3704	32.4074	48.1481	63.8889	52.7778	51.8519	47.2222	36.1111	23	30	26	29	21.2963	24.0741	27.7778	26.8519	50.9259	48.1481	54.6296	49.0741	45.3704	51.8519	23	47	14	24	21.2963	12.963
p127KF561618	324	80	57	99	88	24.6914	17.5926	30.5556	27.1605	44.7531	51.8519	57.716	55.2469	42.284	48.1481	34	22	17	35	31.4815	15.7407	20.3704	32.4074	48.1481	63.8889	52.7778	51.8519	47.2222	36.1111	23	29	27	29	21.2963	25	26.8519	26.8519	51.8519	48.1481	53.7037	48.1481	46.2963	51.8519	23	48	13	24	21.2963	12.037
p128KF561617	324	80	56	100	88	24.6914	17.284	30.8642	27.1605	44.4444	51.8519	58.0247	55.5556	41.9753	48.1481	34	22	17	35	31.4815	15.7407	20.3704	32.4074	48.1481	63.8889	52.7778	51.8519	47.2222	36.1111	23	30	26	29	21.2963	24.0741	27.7778	26.8519	50.9259	48.1481	54.6296	49.0741	45.3704	51.8519	23	48	13	24	21.2963	12.037
p129KF561616	324	80	56	100	88	24.6914	17.284	30.8642	27.1605	44.4444	51.8519	58.0247	55.5556	41.9753	48.1481	34	22	17	35	31.4815	15.7407	20.3704	32.4074	48.1481	63.8889	52.7778	51.8519	47.2222	36.1111	23	30	26	29	21.2963	24.0741	27.7778	26.8519	50.9259	48.1481	54.6296	49.0741	45.3704	51.8519	23	48	13	24	21.2963	12.037
p130KF561615	324	80	56	100	88	24.6914	17.284	30.8642	27.1605	44.4444	51.8519	58.0247	55.5556	41.9753	48.1481	34	22	17	35	31.4815	15.7407	20.3704	32.4074	48.1481	63.8889	52.7778	51.8519	47.2222	36.1111	23	30	26	29	21.2963	24.0741	27.7778	26.8519	50.9259	48.1481	54.6296	49.0741	45.3704	51.8519	23	48	13	24	21.2963	12.037
p131KF561614	324	80	56	100	88	24.6914	17.284	30.8642	27.1605	44.4444	51.8519	58.0247	55.5556	41.9753	48.1481	34	22	17	35	31.4815	15.7407	20.3704	32.4074	48.1481	63.8889	52.7778	51.8519	47.2222	36.1111	23	30	26	29	21.2963	24.0741	27.7778	26.8519	50.9259	48.1481	54.6296	49.0741	45.3704	51.8519	23	48	13	24	21.2963	12.037
p132KF561613	324	79	58	99	88	24.3827	17.9012	30.5556	27.1605	45.0617	51.5432	57.716	54.9383	42.284	48.4568	34	22	17	35	31.4815	15.7407	20.3704	32.4074	48.1481	63.8889	52.7778	51.8519	47.2222	36.1111	23	29	27	29	21.2963	25	26.8519	26.8519	51.8519	48.1481	53.7037	48.1481	46.2963	51.8519	22	48	14	24	20.3704	12.963
p133KF561612	324	80	57	99	88	24.6914	17.5926	30.5556	27.1605	44.7531	51.8519	57.716	55.2469	42.284	48.1481	34	22	17	35	31.4815	15.7407	20.3704	32.4074	48.1481	63.8889	52.7778	51.8519	47.2222	36.1111	23	30	26	29	21.2963	24.0741	27.7778	26.8519	50.9259	48.1481	54.6296	49.0741	45.3704	51.8519	23	47	14	24	21.2963	12.963
p134KF561611	324	79	57	99	89	24.3827	17.5926	30.5556	27.4691	45.0617	51.8519	58.0247	54.9383	41.9753	48.1481	34	22	17	35	31.4815	15.7407	20.3704	32.4074	48.1481	63.8889	52.7778	51.8519	47.2222	36.1111	23	30	26	29	21.2963	24.0741	27.7778	26.8519	50.9259	48.1481	54.6296	49.0741	45.3704	51.8519	22	47	14	25	20.3704	12.963
p135KF561610	324	80	57	98	89	24.6914	17.5926	30.2469	27.4691	45.0617	52.1605	57.716	54.9383	42.284	47.8395	34	22	17	35	31.4815	15.7407	20.3704	32.4074	48.1481	63.8889	52.7778	51.8519	47.2222	36.1111	24	30	26	28	22.2222	24.0741	27.7778	25.9259	50	48.1481	53.7037	50	46.2963	51.8519	22	46	14	26	20.3704	12.963
p136KF561609	324	80	57	98	89	24.6914	17.5926	30.2469	27.4691	45.0617	52.1605	57.716	54.9383	42.284	47.8395	34	22	17	35	31.4815	15.7407	20.3704	32.4074	48.1481	63.8889	52.7778	51.8519	47.2222	36.1111	24	30	26	28	22.2222	24.0741	27.7778	25.9259	50	48.1481	53.7037	50	46.2963	51.8519	22	46	14	26	20.3704	12.963
p137KF561608	324	80	58	97	89	24.6914	17.9012	29.9383	27.4691	45.3704	52.1605	57.4074	54.6296	42.5926	47.8395	34	21	18	35	31.4815	16.6667	19.4444	32.4074	49.0741	63.8889	51.8519	50.9259	48.1481	36.1111	23	30	26	29	21.2963	24.0741	27.7778	26.8519	50.9259	48.1481	54.6296	49.0741	45.3704	51.8519	23	46	14	25	21.2963	12.963
p138KF561607	324	80	57	98	89	24.6914	17.5926	30.2469	27.4691	45.0617	52.1605	57.716	54.9383	42.284	47.8395	34	22	17	35	31.4815	15.7407	20.3704	32.4074	48.1481	63.8889	52.7778	51.8519	47.2222	36.1111	24	30	26	28	22.2222	24.0741	27.7778	25.9259	50	48.1481	53.7037	50	46.2963	51.8519	22	46	14	26	20.3704	12.963
p139KF561606	324	80	58	97	89	24.6914	17.9012	29.9383	27.4691	45.3704	52.1605	57.4074	54.6296	42.5926	47.8395	34	21	18	35	31.4815	16.6667	19.4444	32.4074	49.0741	63.8889	51.8519	50.9259	48.1481	36.1111	23	30	26	29	21.2963	24.0741	27.7778	26.8519	50.9259	48.1481	54.6296	49.0741	45.3704	51.8519	23	46	14	25	21.2963	12.963
p140KF561605	324	79	57	99	89	24.3827	17.5926	30.5556	27.4691	45.0617	51.8519	58.0247	54.9383	41.9753	48.1481	34	22	17	35	31.4815	15.7407	20.3704	32.4074	48.1481	63.8889	52.7778	51.8519	47.2222	36.1111	23	30	26	29	21.2963	24.0741	27.7778	26.8519	50.9259	48.1481	54.6296	49.0741	45.3704	51.8519	22	47	14	25	20.3704	12.963
p141KF561604	324	79	57	99	89	24.3827	17.5926	30.5556	27.4691	45.0617	51.8519	58.0247	54.9383	41.9753	48.1481	34	22	17	35	31.4815	15.7407	20.3704	32.4074	48.1481	63.8889	52.7778	51.8519	47.2222	36.1111	23	30	26	29	21.2963	24.0741	27.7778	26.8519	50.9259	48.1481	54.6296	49.0741	45.3704	51.8519	22	47	14	25	20.3704	12.963
p142KF561603	324	79	58	98	89	24.3827	17.9012	30.2469	27.4691	45.3704	51.8519	57.716	54.6296	42.284	48.1481	34	22	17	35	31.4815	15.7407	20.3704	32.4074	48.1481	63.8889	52.7778	51.8519	47.2222	36.1111	23	30	26	29	21.2963	24.0741	27.7778	26.8519	50.9259	48.1481	54.6296	49.0741	45.3704	51.8519	22	46	15	25	20.3704	13.8889
p143KF561602	324	79	57	99	89	24.3827	17.5926	30.5556	27.4691	45.0617	51.8519	58.0247	54.9383	41.9753	48.1481	34	22	17	35	31.4815	15.7407	20.3704	32.4074	48.1481	63.8889	52.7778	51.8519	47.2222	36.1111	23	30	26	29	21.2963	24.0741	27.7778	26.8519	50.9259	48.1481	54.6296	49.0741	45.3704	51.8519	22	47	14	25	20.3704	12.963
p144KF561601	324	79	57	99	89	24.3827	17.5926	30.5556	27.4691	45.0617	51.8519	58.0247	54.9383	41.9753	48.1481	34	22	17	35	31.4815	15.7407	20.3704	32.4074	48.1481	63.8889	52.7778	51.8519	47.2222	36.1111	23	30	26	29	21.2963	24.0741	27.7778	26.8519	50.9259	48.1481	54.6296	49.0741	45.3704	51.8519	22	47	14	25	20.3704	12.963
p145KF561600	324	79	57	99	89	24.3827	17.5926	30.5556	27.4691	45.0617	51.8519	58.0247	54.9383	41.9753	48.1481	34	22	17	35	31.4815	15.7407	20.3704	32.4074	48.1481	63.8889	52.7778	51.8519	47.2222	36.1111	23	30	26	29	21.2963	24.0741	27.7778	26.8519	50.9259	48.1481	54.6296	49.0741	45.3704	51.8519	22	47	14	25	20.3704	12.963
p146KF561599	324	80	57	99	88	24.6914	17.5926	30.5556	27.1605	44.7531	51.8519	57.716	55.2469	42.284	48.1481	34	22	17	35	31.4815	15.7407	20.3704	32.4074	48.1481	63.8889	52.7778	51.8519	47.2222	36.1111	23	30	26	29	21.2963	24.0741	27.7778	26.8519	50.9259	48.1481	54.6296	49.0741	45.3704	51.8519	23	47	14	24	21.2963	12.963
p147KF561598	324	79	57	99	89	24.3827	17.5926	30.5556	27.4691	45.0617	51.8519	58.0247	54.9383	41.9753	48.1481	35	22	17	34	32.4074	15.7407	20.3704	31.4815	47.2222	63.8889	51.8519	52.7778	48.1481	36.1111	23	30	26	29	21.2963	24.0741	27.7778	26.8519	50.9259	48.1481	54.6296	49.0741	45.3704	51.8519	21	47	14	26	19.4444	12.963
p148KF561597	324	79	57	99	89	24.3827	17.5926	30.5556	27.4691	45.0617	51.8519	58.0247	54.9383	41.9753	48.1481	34	22	17	35	31.4815	15.7407	20.3704	32.4074	48.1481	63.8889	52.7778	51.8519	47.2222	36.1111	23	30	26	29	21.2963	24.0741	27.7778	26.8519	50.9259	48.1481	54.6296	49.0741	45.3704	51.8519	22	47	14	25	20.3704	12.963
p149KF561596	324	81	59	96	88	25	18.2099	29.6296	27.1605	45.3704	52.1605	56.7901	54.6296	43.2099	47.8395	34	20	19	35	31.4815	17.5926	18.5185	32.4074	50	63.8889	50.9259	50	49.0741	36.1111	23	30	26	29	21.2963	24.0741	27.7778	26.8519	50.9259	48.1481	54.6296	49.0741	45.3704	51.8519	24	46	14	24	22.2222	12.963
p150KF561595	324	81	59	96	88	25	18.2099	29.6296	27.1605	45.3704	52.1605	56.7901	54.6296	43.2099	47.8395	34	20	19	35	31.4815	17.5926	18.5185	32.4074	50	63.8889	50.9259	50	49.0741	36.1111	23	30	26	29	21.2963	24.0741	27.7778	26.8519	50.9259	48.1481	54.6296	49.0741	45.3704	51.8519	24	46	14	24	22.2222	12.963
p151KF561594	324	79	56	101	88	24.3827	17.284	31.1728	27.1605	44.4444	51.5432	58.3333	55.5556	41.6667	48.4568	33	22	17	36	30.5556	15.7407	20.3704	33.3333	49.0741	63.8889	53.7037	50.9259	46.2963	36.1111	24	30	26	28	22.2222	24.0741	27.7778	25.9259	50	48.1481	53.7037	50	46.2963	51.8519	22	49	13	24	20.3704	12.037
p152KF561593	324	81	59	96	88	25	18.2099	29.6296	27.1605	45.3704	52.1605	56.7901	54.6296	43.2099	47.8395	34	20	19	35	31.4815	17.5926	18.5185	32.4074	50	63.8889	50.9259	50	49.0741	36.1111	23	30	26	29	21.2963	24.0741	27.7778	26.8519	50.9259	48.1481	54.6296	49.0741	45.3704	51.8519	24	46	14	24	22.2222	12.963
p153KF561592	324	81	59	96	88	25	18.2099	29.6296	27.1605	45.3704	52.1605	56.7901	54.6296	43.2099	47.8395	34	20	19	35	31.4815	17.5926	18.5185	32.4074	50	63.8889	50.9259	50	49.0741	36.1111	23	30	26	29	21.2963	24.0741	27.7778	26.8519	50.9259	48.1481	54.6296	49.0741	45.3704	51.8519	24	46	14	24	22.2222	12.963
p154KF561591	324	78	58	99	89	24.0741	17.9012	30.5556	27.4691	45.3704	51.5432	58.0247	54.6296	41.9753	48.4568	36	22	17	33	33.3333	15.7407	20.3704	30.5556	46.2963	63.8889	50.9259	53.7037	49.0741	36.1111	21	30	27	30	19.4444	25	27.7778	27.7778	52.7778	47.2222	55.5556	47.2222	44.4444	52.7778	21	47	14	26	19.4444	12.963
p156KF561590	324	78	57	100	89	24.0741	17.5926	30.8642	27.4691	45.0617	51.5432	58.3333	54.9383	41.6667	48.4568	35	22	17	34	32.4074	15.7407	20.3704	31.4815	47.2222	63.8889	51.8519	52.7778	48.1481	36.1111	21	30	27	30	19.4444	25	27.7778	27.7778	52.7778	47.2222	55.5556	47.2222	44.4444	52.7778	22	48	13	25	20.3704	12.037
p157KF561589	324	79	58	99	88	24.3827	17.9012	30.5556	27.1605	45.0617	51.5432	57.716	54.9383	42.284	48.4568	35	22	17	34	32.4074	15.7407	20.3704	31.4815	47.2222	63.8889	51.8519	52.7778	48.1481	36.1111	22	30	27	29	20.3704	25	27.7778	26.8519	51.8519	47.2222	54.6296	48.1481	45.3704	52.7778	22	47	14	25	20.3704	12.963
p158KF561588	324	79	59	98	88	24.3827	18.2099	30.2469	27.1605	45.3704	51.5432	57.4074	54.6296	42.5926	48.4568	35	22	17	34	32.4074	15.7407	20.3704	31.4815	47.2222	63.8889	51.8519	52.7778	48.1481	36.1111	22	29	28	29	20.3704	25.9259	26.8519	26.8519	52.7778	47.2222	53.7037	47.2222	46.2963	52.7778	22	47	14	25	20.3704	12.963
p159KF561587	324	78	58	99	89	24.0741	17.9012	30.5556	27.4691	45.3704	51.5432	58.0247	54.6296	41.9753	48.4568	34	22	17	35	31.4815	15.7407	20.3704	32.4074	48.1481	63.8889	52.7778	51.8519	47.2222	36.1111	22	30	27	29	20.3704	25	27.7778	26.8519	51.8519	47.2222	54.6296	48.1481	45.3704	52.7778	22	47	14	25	20.3704	12.963
p160KF561586	324	79	58	99	88	24.3827	17.9012	30.5556	27.1605	45.0617	51.5432	57.716	54.9383	42.284	48.4568	35	22	17	34	32.4074	15.7407	20.3704	31.4815	47.2222	63.8889	51.8519	52.7778	48.1481	36.1111	22	30	27	29	20.3704	25	27.7778	26.8519	51.8519	47.2222	54.6296	48.1481	45.3704	52.7778	22	47	14	25	20.3704	12.963
p161KF561585	324	76	60	98	90	23.4568	18.5185	30.2469	27.7778	46.2963	51.2346	58.0247	53.7037	41.9753	48.7654	35	22	17	34	32.4074	15.7407	20.3704	31.4815	47.2222	63.8889	51.8519	52.7778	48.1481	36.1111	20	30	28	30	18.5185	25.9259	27.7778	27.7778	53.7037	46.2963	55.5556	46.2963	44.4444	53.7037	21	46	15	26	19.4444	13.8889
p162KF561584	324	78	57	100	89	24.0741	17.5926	30.8642	27.4691	45.0617	51.5432	58.3333	54.9383	41.6667	48.4568	35	22	17	34	32.4074	15.7407	20.3704	31.4815	47.2222	63.8889	51.8519	52.7778	48.1481	36.1111	22	31	26	29	20.3704	24.0741	28.7037	26.8519	50.9259	47.2222	55.5556	49.0741	44.4444	52.7778	21	47	14	26	19.4444	12.963
p163KF561583	324	78	57	100	89	24.0741	17.5926	30.8642	27.4691	45.0617	51.5432	58.3333	54.9383	41.6667	48.4568	35	22	17	34	32.4074	15.7407	20.3704	31.4815	47.2222	63.8889	51.8519	52.7778	48.1481	36.1111	22	31	26	29	20.3704	24.0741	28.7037	26.8519	50.9259	47.2222	55.5556	49.0741	44.4444	52.7778	21	47	14	26	19.4444	12.963
p164KF561582	324	78	57	100	89	24.0741	17.5926	30.8642	27.4691	45.0617	51.5432	58.3333	54.9383	41.6667	48.4568	35	22	17	34	32.4074	15.7407	20.3704	31.4815	47.2222	63.8889	51.8519	52.7778	48.1481	36.1111	22	31	26	29	20.3704	24.0741	28.7037	26.8519	50.9259	47.2222	55.5556	49.0741	44.4444	52.7778	21	47	14	26	19.4444	12.963
p165KJ473993	324	73	61	102	88	22.5309	18.8272	31.4815	27.1605	45.9877	49.6914	58.642	54.0123	41.358	50.3086	31	26	18	33	28.7037	16.6667	24.0741	30.5556	47.2222	59.2593	54.6296	52.7778	45.3704	40.7407	23	28	27	30	21.2963	25	25.9259	27.7778	52.7778	49.0741	53.7037	47.2222	46.2963	50.9259	19	48	16	25	17.5926	14.8148
p166KJ473992	324	75	64	97	88	23.1481	19.7531	29.9383	27.1605	46.9136	50.3086	57.0988	53.0864	42.9012	49.6914	31	23	20	34	28.7037	18.5185	21.2963	31.4815	50	60.1852	52.7778	50	47.2222	39.8148	22	29	28	29	20.3704	25.9259	26.8519	26.8519	52.7778	47.2222	53.7037	47.2222	46.2963	52.7778	22	45	16	25	20.3704	14.8148
p167KJ569697	324	76	63	96	89	23.4568	19.4444	29.6296	27.4691	46.9136	50.9259	57.0988	53.0864	42.9012	49.0741	33	21	20	34	30.5556	18.5185	19.4444	31.4815	50	62.037	50.9259	50	49.0741	37.963	22	30	27	29	20.3704	25	27.7778	26.8519	51.8519	47.2222	54.6296	48.1481	45.3704	52.7778	21	45	16	26	19.4444	14.8148
p168KJ569696	324	70	61	101	92	21.6049	18.8272	31.1728	28.3951	47.2222	50	59.5679	52.7778	40.4321	50	28	26	19	35	25.9259	17.5926	24.0741	32.4074	50	58.3333	56.4815	50	43.5185	41.6667	23	29	26	30	21.2963	24.0741	26.8519	27.7778	51.8519	49.0741	54.6296	48.1481	45.3704	50.9259	19	46	16	27	17.5926	14.8148
p169X57440	324	77	63	96	88	23.7654	19.4444	29.6296	27.1605	46.6049	50.9259	56.7901	53.3951	43.2099	49.0741	33	22	18	35	30.5556	16.6667	20.3704	32.4074	49.0741	62.963	52.7778	50.9259	47.2222	37.037	22	30	27	29	20.3704	25	27.7778	26.8519	51.8519	47.2222	54.6296	48.1481	45.3704	52.7778	22	44	18	24	20.3704	16.6667
p170NC-001361	324	79	65	94	86	24.3827	20.0617	29.0123	26.5432	46.6049	50.9259	55.5556	53.3951	44.4444	49.0741	34	21	19	34	31.4815	17.5926	19.4444	31.4815	49.0741	62.963	50.9259	50.9259	49.0741	37.037	23	30	27	28	21.2963	25	27.7778	25.9259	50.9259	47.2222	53.7037	49.0741	46.2963	52.7778	22	43	19	24	20.3704	17.5926
p171JX678982	324	76	64	96	88	23.4568	19.7531	29.6296	27.1605	46.9136	50.6173	56.7901	53.0864	43.2099	49.3827	33	21	20	34	30.5556	18.5185	19.4444	31.4815	50	62.037	50.9259	50	49.0741	37.963	22	30	27	29	20.3704	25	27.7778	26.8519	51.8519	47.2222	54.6296	48.1481	45.3704	52.7778	21	45	17	25	19.4444	15.7407
p172KJ194171	324	76	62	96	90	23.4568	19.1358	29.6296	27.7778	46.9136	51.2346	57.4074	53.0864	42.5926	48.7654	33	21	20	34	30.5556	18.5185	19.4444	31.4815	50	62.037	50.9259	50	49.0741	37.963	20	30	27	31	18.5185	25	27.7778	28.7037	53.7037	47.2222	56.4815	46.2963	43.5185	52.7778	23	45	15	25	21.2963	13.8889
p173JN835299	324	80	58	99	87	24.6914	17.9012	30.5556	26.8519	44.7531	51.5432	57.4074	55.2469	42.5926	48.4568	35	22	17	34	32.4074	15.7407	20.3704	31.4815	47.2222	63.8889	51.8519	52.7778	48.1481	36.1111	22	30	27	29	20.3704	25	27.7778	26.8519	51.8519	47.2222	54.6296	48.1481	45.3704	52.7778	23	47	14	24	21.2963	12.963
p174HM854296	324	75	63	96	90	23.1481	19.4444	29.6296	27.7778	47.2222	50.9259	57.4074	52.7778	42.5926	49.0741	32	21	20	35	29.6296	18.5185	19.4444	32.4074	50.9259	62.037	51.8519	49.0741	48.1481	37.963	20	31	27	30	18.5185	25	28.7037	27.7778	52.7778	46.2963	56.4815	47.2222	43.5185	53.7037	23	44	16	25	21.2963	14.8148
p175AY311395	77	63	95	89	23.7654	19.4444	29.321	27.4691	46.9136	51.2346	56.7901	53.0864	43.2099	48.7654	34	22	18	34	31.4815	16.6667	20.3704	31.4815	48.1481	62.963	51.8519	51.8519	48.1481	37.037	21	29	28	30	19.4444	25.9259	26.8519	27.7778	53.7037	47.2222	54.6296	46.2963	45.3704	52.7778	22	44	17	25	20.3704	15.7407	40.7407
p176AY311394	78	59	98	89	24.0741	18.2099	30.2469	27.4691	45.679	51.5432	57.716	54.321	42.284	48.4568	35	22	17	34	32.4074	15.7407	20.3704	31.4815	47.2222	63.8889	51.8519	52.7778	48.1481	36.1111	22	30	27	29	20.3704	25	27.7778	26.8519	51.8519	47.2222	54.6296	48.1481	45.3704	52.7778	21	46	15	26	19.4444	13.8889	42.5926
p177EU604672	324	77	63	96	88	23.7654	19.4444	29.6296	27.1605	46.6049	50.9259	56.7901	53.3951	43.2099	49.0741	33	21	20	34	30.5556	18.5185	19.4444	31.4815	50	62.037	50.9259	50	49.0741	37.963	22	30	27	29	20.3704	25	27.7778	26.8519	51.8519	47.2222	54.6296	48.1481	45.3704	52.7778	22	45	16	25	20.3704	14.8148
p178AJ437481	324	78	57	100	89	24.0741	17.5926	30.8642	27.4691	45.0617	51.5432	58.3333	54.9383	41.6667	48.4568	35	22	17	34	32.4074	15.7407	20.3704	31.4815	47.2222	63.8889	51.8519	52.7778	48.1481	36.1111	21	30	27	30	19.4444	25	27.7778	27.7778	52.7778	47.2222	55.5556	47.2222	44.4444	52.7778	22	48	13	25	20.3704	12.037
p179KC699728	324	76	62	99	87	23.4568	19.1358	30.5556	26.8519	45.9877	50.3086	57.4074	54.0123	42.5926	49.6914	32	22	19	35	29.6296	17.5926	20.3704	32.4074	50	62.037	52.7778	50	47.2222	37.963	23	31	25	29	21.2963	23.1481	28.7037	26.8519	50	48.1481	55.5556	50	44.4444	51.8519	21	46	18	23	19.4444	16.6667
180KC699727	324	75	66	95	88	23.1481	20.3704	29.321	27.1605	47.5309	50.3086	56.4815	52.4691	43.5185	49.6914	33	21	21	33	30.5556	19.4444	19.4444	30.5556	50	61.1111	50	50	50	38.8889	22	30	27	29	20.3704	25	27.7778	26.8519	51.8519	47.2222	54.6296	48.1481	45.3704	52.7778	20	44	18	26	18.5185	16.6667
p181KC699726	324	74	64	97	89	22.8395	19.7531	29.9383	27.4691	47.2222	50.3086	57.4074	52.7778	42.5926	49.6914	32	22	20	34	29.6296	18.5185	20.3704	31.4815	50	61.1111	51.8519	50	48.1481	38.8889	22	31	26	29	20.3704	24.0741	28.7037	26.8519	50.9259	47.2222	55.5556	49.0741	44.4444	52.7778	20	44	18	26	18.5185	16.6667
p182KC699725	324	74	65	95	90	22.8395	20.0617	29.321	27.7778	47.8395	50.6173	57.0988	52.1605	42.9012	49.3827	32	21	20	35	29.6296	18.5185	19.4444	32.4074	50.9259	62.037	51.8519	49.0741	48.1481	37.963	20	30	28	30	18.5185	25.9259	27.7778	27.7778	53.7037	46.2963	55.5556	46.2963	44.4444	53.7037	22	44	17	25	20.3704	15.7407
p183KC699724	324	75	66	94	89	23.1481	20.3704	29.0123	27.4691	47.8395	50.6173	56.4815	52.1605	43.5185	49.3827	32	20	21	35	29.6296	19.4444	18.5185	32.4074	51.8519	62.037	50.9259	48.1481	49.0741	37.963	22	30	27	29	20.3704	25	27.7778	26.8519	51.8519	47.2222	54.6296	48.1481	45.3704	52.7778	21	44	18	25	19.4444	16.6667
p184KC699723	324	70	63	94	97	21.6049	19.4444	29.0123	29.9383	49.3827	51.5432	58.9506	50.6173	41.0494	48.4568	27	26	20	35	25	18.5185	24.0741	32.4074	50.9259	57.4074	56.4815	49.0741	43.5185	42.5926	22	28	27	31	20.3704	25	25.9259	28.7037	53.7037	49.0741	54.6296	46.2963	45.3704	50.9259	21	40	16	31	19.4444	14.8148
p185KC699722	324	72	63	93	96	22.2222	19.4444	28.7037	29.6296	49.0741	51.8519	58.3333	50.9259	41.6667	48.1481	28	26	20	34	25.9259	18.5185	24.0741	31.4815	50	57.4074	55.5556	50	44.4444	42.5926	21	28	27	32	19.4444	25	25.9259	29.6296	54.6296	49.0741	55.5556	45.3704	44.4444	50.9259	23	39	16	30	21.2963	14.8148
p186KC699721	324	70	63	94	97	21.6049	19.4444	29.0123	29.9383	49.3827	51.5432	58.9506	50.6173	41.0494	48.4568	27	26	20	35	25	18.5185	24.0741	32.4074	50.9259	57.4074	56.4815	49.0741	43.5185	42.5926	22	28	27	31	20.3704	25	25.9259	28.7037	53.7037	49.0741	54.6296	46.2963	45.3704	50.9259	21	40	16	31	19.4444	14.8148
p187KC699720	324	75	65	95	89	23.1481	20.0617	29.321	27.4691	47.5309	50.6173	56.7901	52.4691	43.2099	49.3827	32	21	20	35	29.6296	18.5185	19.4444	32.4074	50.9259	62.037	51.8519	49.0741	48.1481	37.963	22	30	27	29	20.3704	25	27.7778	26.8519	51.8519	47.2222	54.6296	48.1481	45.3704	52.7778	21	44	18	25	19.4444	16.6667
p188KC699719	324	75	65	95	89	23.1481	20.0617	29.321	27.4691	47.5309	50.6173	56.7901	52.4691	43.2099	49.3827	32	21	20	35	29.6296	18.5185	19.4444	32.4074	50.9259	62.037	51.8519	49.0741	48.1481	37.963	22	30	27	29	20.3704	25	27.7778	26.8519	51.8519	47.2222	54.6296	48.1481	45.3704	52.7778	21	44	18	25	19.4444	16.6667
p189KC699718	324	75	65	95	89	23.1481	20.0617	29.321	27.4691	47.5309	50.6173	56.7901	52.4691	43.2099	49.3827	32	21	20	35	29.6296	18.5185	19.4444	32.4074	50.9259	62.037	51.8519	49.0741	48.1481	37.963	22	30	27	29	20.3704	25	27.7778	26.8519	51.8519	47.2222	54.6296	48.1481	45.3704	52.7778	21	44	18	25	19.4444	16.6667
p190KC699717	324	71	57	105	91	21.9136	17.5926	32.4074	28.0864	45.679	50	60.4938	54.321	39.5062	50	31	27	17	33	28.7037	15.7407	25	30.5556	46.2963	59.2593	55.5556	53.7037	44.4444	40.7407	24	30	25	29	22.2222	23.1481	27.7778	26.8519	50	49.0741	54.6296	50	45.3704	50.9259	16	48	15	29	14.8148	13.8889
p191KC699716	324	71	57	105	91	21.9136	17.5926	32.4074	28.0864	45.679	50	60.4938	54.321	39.5062	50	31	27	17	33	28.7037	15.7407	25	30.5556	46.2963	59.2593	55.5556	53.7037	44.4444	40.7407	24	30	25	29	22.2222	23.1481	27.7778	26.8519	50	49.0741	54.6296	50	45.3704	50.9259	16	48	15	29	14.8148	13.8889
p192KC699715	324	75	65	95	89	23.1481	20.0617	29.321	27.4691	47.5309	50.6173	56.7901	52.4691	43.2099	49.3827	32	21	20	35	29.6296	18.5185	19.4444	32.4074	50.9259	62.037	51.8519	49.0741	48.1481	37.963	22	30	27	29	20.3704	25	27.7778	26.8519	51.8519	47.2222	54.6296	48.1481	45.3704	52.7778	21	44	18	25	19.4444	16.6667
p198KC699714	324	71	56	105	92	21.9136	17.284	32.4074	28.3951	45.679	50.3086	60.8025	54.321	39.1975	49.6914	31	27	17	33	28.7037	15.7407	25	30.5556	46.2963	59.2593	55.5556	53.7037	44.4444	40.7407	24	29	25	30	22.2222	23.1481	26.8519	27.7778	50.9259	50	54.6296	49.0741	45.3704	50	16	49	14	29	14.8148	12.963
p199KC699713	324	75	65	95	89	23.1481	20.0617	29.321	27.4691	47.5309	50.6173	56.7901	52.4691	43.2099	49.3827	32	21	20	35	29.6296	18.5185	19.4444	32.4074	50.9259	62.037	51.8519	49.0741	48.1481	37.963	22	30	27	29	20.3704	25	27.7778	26.8519	51.8519	47.2222	54.6296	48.1481	45.3704	52.7778	21	44	18	25	19.4444	16.6667
KY364848	324	71	59	104	90	21.9136	18.2099	32.0988	27.7778	45.9877	49.6914	59.8765	54.0123	40.1235	50.3086	31	26	18	33	28.7037	16.6667	24.0741	30.5556	47.2222	59.2593	54.6296	52.7778	45.3704	40.7407	24	28	27	29	22.2222	25	25.9259	26.8519	51.8519	49.0741	52.7778	48.1481	47.2222	50.9259	16	50	14	28	14.8148	12.963
MH558037	324	78	63	94	89	24.0741	19.4444	29.0123	27.4691	46.9136	51.5432	56.4815	53.0864	43.5185	48.4568	33	22	19	34	30.5556	17.5926	20.3704	31.4815	49.0741	62.037	51.8519	50.9259	48.1481	37.963	21	31	26	30	19.4444	24.0741	28.7037	27.7778	51.8519	47.2222	56.4815	48.1481	43.5185	52.7778	24	41	18	25	22.2222	16.6667
MH558036	324	78	61	97	88	24.0741	18.8272	29.9383	27.1605	45.9877	51.2346	57.0988	54.0123	42.9012	48.7654	33	22	19	34	30.5556	17.5926	20.3704	31.4815	49.0741	62.037	51.8519	50.9259	48.1481	37.963	21	31	26	30	19.4444	24.0741	28.7037	27.7778	51.8519	47.2222	56.4815	48.1481	43.5185	52.7778	24	44	16	24	22.2222	14.8148
MG356509	324	70	64	97	93	21.6049	19.7531	29.9383	28.7037	48.4568	50.3086	58.642	51.5432	41.358	49.6914	28	25	20	35	25.9259	18.5185	23.1481	32.4074	50.9259	58.3333	55.5556	49.0741	44.4444	41.6667	23	31	24	30	21.2963	22.2222	28.7037	27.7778	50	49.0741	56.4815	50	43.5185	50.9259	19	41	20	28	17.5926	18.5185
MG356508	324	70	64	97	93	21.6049	19.7531	29.9383	28.7037	48.4568	50.3086	58.642	51.5432	41.358	49.6914	28	25	20	35	25.9259	18.5185	23.1481	32.4074	50.9259	58.3333	55.5556	49.0741	44.4444	41.6667	23	31	24	30	21.2963	22.2222	28.7037	27.7778	50	49.0741	56.4815	50	43.5185	50.9259	19	41	20	28	17.5926	18.5185
[truncated: 9 more columns]

## Sheet: Sheet2
label	Axis1	Axis2	Axis3	Axis4			Axis1	Axis2	Origin				GC3s	Nc	Origin		%GC12	GC12	%G3+C3	GC3			GC3	GC12	Origin		%A3	%A3+T3	A3/A3+T3	%G3	%G3+C3	G3/G3+C3		G3/G3+C3	A3/A3+T3	Origin
1_p77KF561668_2011_Y	-0.15588	0.04733	-0.00132	-0.02455			-0.15588	0.04733	pepino				0.343	47.87	pepino		50	0.5	36.1111	0.361111			0.361111	0.5	pepino		20.3704	63.8889	0.318841	23.1481	36.1111	0.641026		0.641026	0.318841	pepino
2_p78KF561667_2011_Y	-0.12334	0.03934	-0.03344	-0.00663			-0.12334	0.03934	pepino				0.352	48.78	pepino		49.537	0.49537	37.037	0.37037			0.37037	0.49537	pepino		19.4444	62.963	0.308824	23.1481	37.037	0.625		0.625	0.308824	pepino
3_p79KF561666_2011_Y	-0.12728	0.03844	-0.02752	-0.00621			-0.12728	0.03844	pepino				0.352	48.53	pepino		49.537	0.49537	37.037	0.37037			0.37037	0.49537	pepino		20.3704	62.963	0.323529	23.1481	37.037	0.625		0.625	0.323529	pepino
4_p80KF561665_2010_G	-0.16252	0.06613	-0.00147	-0.04606			-0.16252	0.06613	pepino				0.343	47.07	pepino		49.0741	0.490741	36.1111	0.361111			0.361111	0.490741	pepino		20.3704	63.8889	0.318841	23.1481	36.1111	0.641026		0.641026	0.318841	pepino
5_p81KF561664_2010_G	-0.16252	0.06613	-0.00147	-0.04606			-0.16252	0.06613	pepino				0.343	47.07	pepino		49.0741	0.490741	36.1111	0.361111			0.361111	0.490741	pepino		20.3704	63.8889	0.318841	23.1481	36.1111	0.641026		0.641026	0.318841	pepino
6_p82KF561663_2010_G	-0.15751	0.06812	-0.00341	-0.03595			-0.15751	0.06812	tomato				0.333	46.93	tomato		49.537	0.49537	35.1852	0.351852			0.351852	0.49537	tomato		21.2963	64.8148	0.328571	22.2222	35.1852	0.631579		0.631579	0.328571	tomato
7_p83KF561662_2010_G	-0.12513	0.0344	-0.04417	0.0015			-0.12513	0.0344	tomato				0.343	49.77	tomato		49.0741	0.490741	36.1111	0.361111			0.361111	0.490741	tomato		21.2963	63.8889	0.333333	22.2222	36.1111	0.615385		0.615385	0.333333	tomato
8_p84KF561661_2010_G	-0.15751	0.06812	-0.00341	-0.03595			-0.15751	0.06812	tomato				0.333	46.93	tomato		49.537	0.49537	35.1852	0.351852			0.351852	0.49537	tomato		21.2963	64.8148	0.328571	22.2222	35.1852	0.631579		0.631579	0.328571	tomato
9_p85KF561660_2011_Y	-0.15588	0.04733	-0.00132	-0.02455			-0.15588	0.04733	pepino				0.343	47.87	pepino		50	0.5	36.1111	0.361111			0.361111	0.5	pepino		20.3704	63.8889	0.318841	23.1481	36.1111	0.641026		0.641026	0.318841	pepino
10_p86KF561659_2011_	-0.06634	-0.18319	0.03043	-0.04172			-0.06634	-0.18319	pepino				0.343	47.87	pepino		50.463	0.50463	36.1111	0.361111			0.361111	0.50463	pepino		20.3704	63.8889	0.318841	23.1481	36.1111	0.641026		0.641026	0.318841	pepino
11_p87KF561658_2011_	-0.1565	0.07002	-0.00073	-0.0428			-0.1565	0.07002	pepino				0.343	46.8	pepino		49.537	0.49537	36.1111	0.361111			0.361111	0.49537	pepino		20.3704	63.8889	0.318841	23.1481	36.1111	0.641026		0.641026	0.318841	pepino
12_p88KF561657_2011_	-0.074	-0.02653	-0.09421	0.08678			-0.074	-0.02653	pepino				0.381	51.6	pepino		50	0.5	39.8148	0.398148			0.398148	0.5	pepino		18.5185	60.1852	0.307692	24.0741	39.8148	0.604651		0.604651	0.307692	pepino
13_p89KF561656_2011_	-0.074	-0.02653	-0.09421	0.08678			-0.074	-0.02653	pepino				0.381	51.6	pepino		50	0.5	39.8148	0.398148			0.398148	0.5	pepino		18.5185	60.1852	0.307692	24.0741	39.8148	0.604651		0.604651	0.307692	pepino
14_p90KF561655_2011_	-0.074	-0.02653	-0.09421	0.08678			-0.074	-0.02653	pepino				0.381	51.6	pepino		50	0.5	39.8148	0.398148			0.398148	0.5	pepino		18.5185	60.1852	0.307692	24.0741	39.8148	0.604651		0.604651	0.307692	pepino
15_p91KF561654_2011_	-0.10836	5e-05	-0.04687	0.04448			-0.10836	5e-05	pepino				0.371	54.44	pepino		50.9259	0.509259	38.8889	0.388889			0.388889	0.509259	pepino		18.5185	61.1111	0.30303	24.0741	38.8889	0.619048		0.619048	0.30303	pepino
16_p92KF561653_2011_	-0.11745	-0.01392	-0.05045	0.04273			-0.11745	-0.01392	pepino				0.39	53.58	pepino		50.9259	0.509259	40.7407	0.407407			0.407407	0.509259	pepino		17.5926	59.2593	0.296875	25	40.7407	0.613636		0.613636	0.296875	pepino
17_p93KF561652_2011_	-0.10836	5e-05	-0.04687	0.04448			-0.10836	5e-05	pepino				0.371	54.44	pepino		50.9259	0.509259	38.8889	0.388889			0.388889	0.509259	pepino		18.5185	61.1111	0.30303	24.0741	38.8889	0.619048		0.619048	0.30303	pepino
18_p94KF561651_2011_	-0.10836	5e-05	-0.04687	0.04448			-0.10836	5e-05	pepino				0.371	54.44	pepino		50.9259	0.509259	38.8889	0.388889			0.388889	0.509259	pepino		18.5185	61.1111	0.30303	24.0741	38.8889	0.619048		0.619048	0.30303	pepino
19_p95KF561650_2011_	-0.099	0.00918	-0.05049	0.04706			-0.099	0.00918	pepino				0.362	54.44	pepino		50.9259	0.509259	37.963	0.37963			0.37963	0.509259	pepino		18.5185	62.037	0.298507	24.0741	37.963	0.634146		0.634146	0.298507	pepino
20_p96KF561649_2011_	0.00026	-0.21637	0.03822	0.20884			0.00026	-0.21637	pepino				0.352	48.78	pepino		50	0.5	37.037	0.37037			0.37037	0.5	pepino		19.4444	62.963	0.308824	23.1481	37.037	0.625		0.625	0.308824	pepino
21_p97KF561648_2011_	-0.12334	0.03934	-0.03344	-0.00663			-0.12334	0.03934	pepino				0.352	48.78	pepino		49.537	0.49537	37.037	0.37037			0.37037	0.49537	pepino		19.4444	62.963	0.308824	23.1481	37.037	0.625		0.625	0.308824	pepino
22_p98KF561647_2011_	-0.11496	0.02165	-0.04632	0.0036			-0.11496	0.02165	pepino				0.352	51.61	pepino		50	0.5	37.037	0.37037			0.37037	0.5	pepino		19.4444	62.963	0.308824	23.1481	37.037	0.625		0.625	0.308824	pepino
23_p99KF561646_2011_	-0.12472	0.03713	-0.02904	-0.00588			-0.12472	0.03713	pepino				0.371	48.35	pepino		49.537	0.49537	38.8889	0.388889			0.388889	0.49537	pepino		18.5185	61.1111	0.30303	24.0741	38.8889	0.619048		0.619048	0.30303	pepino
24_p100KF561645_2011	-0.12334	0.03934	-0.03344	-0.00663			-0.12334	0.03934	pepino				0.352	48.78	pepino		49.537	0.49537	37.037	0.37037			0.37037	0.49537	pepino		19.4444	62.963	0.308824	23.1481	37.037	0.625		0.625	0.308824	pepino
25_p101KF561644_2011	-0.12728	0.03844	-0.02752	-0.00621			-0.12728	0.03844	pepino				0.352	48.53	pepino		49.537	0.49537	37.037	0.37037			0.37037	0.49537	pepino		20.3704	62.963	0.323529	23.1481	37.037	0.625		0.625	0.323529	pepino
26_p102KF561643_2011	-0.12472	0.03713	-0.02904	-0.00588			-0.12472	0.03713	pepino				0.371	48.35	pepino		49.537	0.49537	38.8889	0.388889			0.388889	0.49537	pepino		18.5185	61.1111	0.30303	24.0741	38.8889	0.619048		0.619048	0.30303	pepino
27_p103KF561642_2011	-0.1242	0.04738	-0.01369	0.00303			-0.1242	0.04738	pepino				0.371	49.74	pepino		49.537	0.49537	38.8889	0.388889			0.388889	0.49537	pepino		19.4444	61.1111	0.318182	23.1481	38.8889	0.595238		0.595238	0.318182	pepino
28_p104KF561641_2010	-0.14679	0.08301	0.00882	-0.03424			-0.14679	0.08301	pepino				0.324	46.58	pepino		50	0.5	34.2593	0.342593			0.342593	0.5	pepino		22.2222	65.7407	0.338028	22.2222	34.2593	0.648649		0.648649	0.338028	pepino
29_p105KF561640_2010	-0.14616	0.08329	-0.00305	-0.03231			-0.14616	0.08329	pepino				0.324	46.93	pepino		49.537	0.49537	34.2593	0.342593			0.342593	0.49537	pepino		21.2963	65.7407	0.323944	22.2222	34.2593	0.648649		0.648649	0.323944	pepino
30_p106KF561639_2010	-0.16252	0.06613	-0.00147	-0.04606			-0.16252	0.06613	pepino				0.343	47.07	pepino		49.0741	0.490741	36.1111	0.361111			0.361111	0.490741	pepino		20.3704	63.8889	0.318841	23.1481	36.1111	0.641026		0.641026	0.318841	pepino
31_p107KF561638_2010	-0.16252	0.06613	-0.00147	-0.04606			-0.16252	0.06613	pepino				0.343	47.07	pepino		49.0741	0.490741	36.1111	0.361111			0.361111	0.490741	pepino		20.3704	63.8889	0.318841	23.1481	36.1111	0.641026		0.641026	0.318841	pepino
32_p108KF561637_2010	-0.1501	0.08239	0.00286	-0.03189			-0.1501	0.08239	pepino				0.324	46.69	pepino		49.537	0.49537	34.2593	0.342593			0.342593	0.49537	pepino		22.2222	65.7407	0.338028	22.2222	34.2593	0.648649		0.648649	0.338028	pepino
33_p109KF561636_2010	-0.1565	0.07002	-0.00073	-0.0428			-0.1565	0.07002	pepino				0.343	46.8	pepino		49.537	0.49537	36.1111	0.361111			0.361111	0.49537	pepino		20.3704	63.8889	0.318841	23.1481	36.1111	0.641026		0.641026	0.318841	pepino
34_p110KF561635_2010	-0.15502	0.06957	-0.00242	-0.04655			-0.15502	0.06957	pepino				0.343	46.91	pepino		49.0741	0.490741	36.1111	0.361111			0.361111	0.490741	pepino		20.3704	63.8889	0.318841	23.1481	36.1111	0.641026		0.641026	0.318841	pepino
35_p111KF561634_2010	-0.15502	0.06957	-0.00242	-0.04655			-0.15502	0.06957	pepino				0.343	46.91	pepino		49.0741	0.490741	36.1111	0.361111			0.361111	0.490741	pepino		20.3704	63.8889	0.318841	23.1481	36.1111	0.641026		0.641026	0.318841	pepino
36_p112KF561633_2010	-0.06002	0.02426	-0.05454	0.0023			-0.06002	0.02426	pepino				0.362	52.83	pepino		49.0741	0.490741	37.963	0.37963			0.37963	0.490741	pepino		20.3704	62.037	0.328358	23.1481	37.963	0.609756		0.609756	0.328358	pepino
37_p113KF561632_2010	-0.1565	0.07002	-0.00073	-0.0428			-0.1565	0.07002	pepino				0.343	46.8	pepino		49.537	0.49537	36.1111	0.361111			0.361111	0.49537	pepino		20.3704	63.8889	0.318841	23.1481	36.1111	0.641026		0.641026	0.318841	pepino
38_p114KF561631_2010	-0.06002	0.02426	-0.05454	0.0023			-0.06002	0.02426	pepino				0.362	52.83	pepino		49.0741	0.490741	37.963	0.37963			0.37963	0.490741	pepino		20.3704	62.037	0.328358	23.1481	37.963	0.609756		0.609756	0.328358	pepino
39_p115KF561630_2010	-0.15962	0.07024	-0.00258	-0.04393			-0.15962	0.07024	pepino				0.343	46.55	pepino		50	0.5	36.1111	0.361111			0.361111	0.5	pepino		20.3704	63.8889	0.318841	23.1481	36.1111	0.641026		0.641026	0.318841	pepino
40_p116KF561629_2010	-0.1602	0.08408	0.00528	-0.02712			-0.1602	0.08408	pepino				0.352	46.96	pepino		50	0.5	37.037	0.37037			0.37037	0.5	pepino		20.3704	62.963	0.323529	23.1481	37.037	0.625		0.625	0.323529	pepino
41_p117KF561628_2010	-0.16129	0.0668	-0.00329	-0.04306			-0.16129	0.0668	pepino				0.343	46.35	pepino		49.0741	0.490741	36.1111	0.361111			0.361111	0.490741	pepino		20.3704	63.8889	0.318841	23.1481	36.1111	0.641026		0.641026	0.318841	pepino
42_p118KF561627_2010	-0.15024	0.05874	-0.00836	-0.04176			-0.15024	0.05874	pepino				0.343	46.26	pepino		49.537	0.49537	36.1111	0.361111			0.361111	0.49537	pepino		19.4444	63.8889	0.304348	23.1481	36.1111	0.641026		0.641026	0.304348	pepino
43_p119KF561626_2010	-0.15487	0.07019	-0.0003	-0.04202			-0.15487	0.07019	pepino				0.337	47.06	pepino		49.0741	0.490741	36.1111	0.361111			0.361111	0.490741	pepino		20.3704	63.8889	0.318841	23.1481	36.1111	0.641026		0.641026	0.318841	pepino
44_p120KF561625_2010	-0.1565	0.07002	-0.00073	-0.0428			-0.1565	0.07002	pepino				0.343	46.8	pepino		49.537	0.49537	36.1111	0.361111			0.361111	0.49537	pepino		20.3704	63.8889	0.318841	23.1481	36.1111	0.641026		0.641026	0.318841	pepino
45_p121KF561624_2010	-0.1565	0.07002	-0.00073	-0.0428			-0.1565	0.07002	pepino				0.343	46.8	pepino		49.537	0.49537	36.1111	0.361111			0.361111	0.49537	pepino		20.3704	63.8889	0.318841	23.1481	36.1111	0.641026		0.641026	0.318841	pepino
46_p122KF561623_2010	-0.16182	0.06143	0.00274	-0.04568			-0.16182	0.06143	pepino				0.352	47.79	pepino		50	0.5	37.037	0.37037			0.37037	0.5	pepino		19.4444	62.963	0.308824	24.0741	37.037	0.65		0.65	0.308824	pepino
47_p123KF561622_2010	-0.16182	0.06143	0.00274	-0.04568			-0.16182	0.06143	pepino				0.352	47.79	pepino		50	0.5	37.037	0.37037			0.37037	0.5	pepino		19.4444	62.963	0.308824	24.0741	37.037	0.65		0.65	0.308824	pepino
48_p124KF561621_2010	-0.16182	0.06143	0.00274	-0.04568			-0.16182	0.06143	pepino				0.352	47.79	pepino		50	0.5	37.037	0.37037			0.37037	0.5	pepino		19.4444	62.963	0.308824	24.0741	37.037	0.65		0.65	0.308824	pepino
49_p125KF561620_2011	-0.15423	0.08148	0.00627	-0.01821			-0.15423	0.08148	pepino				0.333	48.42	pepino		50	0.5	35.1852	0.351852			0.351852	0.5	pepino		21.2963	64.8148	0.328571	22.2222	35.1852	0.631579		0.631579	0.328571	pepino
50_p126KF561619_2011	-0.15965	0.09691	0.01572	-0.00334			-0.15965	0.09691	pepino				0.333	43.72	pepino		49.537	0.49537	35.1852	0.351852			0.351852	0.49537	pepino		21.2963	64.8148	0.328571	22.2222	35.1852	0.631579		0.631579	0.328571	pepino
51_p127KF561618_2011	-0.01826	0.11624	-0.14941	0.18882			-0.01826	0.11624	pepino				0.324	46.67	pepino		50	0.5	34.2593	0.342593			0.342593	0.5	pepino		21.2963	65.7407	0.323944	22.2222	34.2593	0.648649		0.648649	0.323944	pepino
52_p128KF561617_2011	-0.16254	0.10021	0.01136	-0.00548			-0.16254	0.10021	pepino				0.324	43.72	pepino		49.537	0.49537	34.2593	0.342593			0.342593	0.49537	pepino		21.2963	65.7407	0.323944	22.2222	34.2593	0.648649		0.648649	0.323944	pepino
53_p129KF561616_2011	-0.16254	0.10021	0.01136	-0.00548			-0.16254	0.10021	pepino				0.324	43.72	pepino		49.537	0.49537	34.2593	0.342593			0.342593	0.49537	pepino		21.2963	65.7407	0.323944	22.2222	34.2593	0.648649		0.648649	0.323944	pepino
54_p130KF561615_2011	-0.16254	0.10021	0.01136	-0.00548			-0.16254	0.10021	pepino				0.324	43.72	pepino		49.537	0.49537	34.2593	0.342593			0.342593	0.49537	pepino		21.2963	65.7407	0.323944	22.2222	34.2593	0.648649		0.648649	0.323944	pepino
55_p131KF561614_2011	-0.16254	0.10021	0.01136	-0.00548			-0.16254	0.10021	pepino				0.324	43.72	pepino		49.537	0.49537	34.2593	0.342593			0.342593	0.49537	pepino		21.2963	65.7407	0.323944	22.2222	34.2593	0.648649		0.648649	0.323944	pepino
56_p132KF561613_2011	-0.1519	0.09819	0.011	-0.01766			-0.1519	0.09819	pepino				0.333	45.91	pepino		50	0.5	35.1852	0.351852			0.351852	0.5	pepino		20.3704	64.8148	0.314286	22.2222	35.1852	0.631579		0.631579	0.314286	pepino
57_p133KF561612_2011	-0.14628	0.08428	0.01164	-0.02197			-0.14628	0.08428	pepino				0.333	48.24	pepino		49.537	0.49537	35.1852	0.351852			0.351852	0.49537	pepino		21.2963	64.8148	0.328571	22.2222	35.1852	0.631579		0.631579	0.328571	pepino
58_p134KF561611_2011	-0.14578	0.08716	0.00825	-0.0192			-0.14578	0.08716	pepino				0.343	48.24	pepino		49.537	0.49537	36.1111	0.361111			0.361111	0.49537	pepino		20.3704	63.8889	0.318841	23.1481	36.1111	0.641026		0.641026	0.318841	pepino
59_p135KF561610_2011	-0.07031	0.16316	0.10776	0.05777			-0.07031	0.16316	pepino				0.352	47.85	pepino		49.0741	0.490741	37.037	0.37037			0.37037	0.490741	pepino		20.3704	62.963	0.323529	24.0741	37.037	0.65		0.65	0.323529	pepino
60_p136KF561609_2011	-0.07031	0.16316	0.10776	0.05777			-0.07031	0.16316	pepino				0.352	47.85	pepino		49.0741	0.490741	37.037	0.37037			0.37037	0.490741	pepino		20.3704	62.963	0.323529	24.0741	37.037	0.65		0.65	0.323529	pepino
61_p137KF561608_2011	-0.16297	0.0774	0.01144	-0.02402			-0.16297	0.0774	pepino				0.343	47.71	pepino		50	0.5	36.1111	0.361111			0.361111	0.5	pepino		21.2963	63.8889	0.333333	23.1481	36.1111	0.641026		0.641026	0.333333	pepino
62_p138KF561607_2011	-0.07031	0.16316	0.10776	0.05777			-0.07031	0.16316	pepino				0.352	47.85	pepino		49.0741	0.490741	37.037	0.37037			0.37037	0.490741	pepino		20.3704	62.963	0.323529	24.0741	37.037	0.65		0.65	0.323529	pepino
63_p139KF561606_2011	-0.16297	0.0774	0.01144	-0.02402			-0.16297	0.0774	pepino				0.343	47.71	pepino		50	0.5	36.1111	0.361111			0.361111	0.5	pepino		21.2963	63.8889	0.333333	23.1481	36.1111	0.641026		0.641026	0.333333	pepino
64_p140KF561605_2011	-0.15803	0.08133	0.00752	-0.02391			-0.15803	0.08133	pepino				0.343	47.96	pepino		49.537	0.49537	36.1111	0.361111			0.361111	0.49537	pepino		20.3704	63.8889	0.318841	23.1481	36.1111	0.641026		0.641026	0.318841	pepino
65_p141KF561604_2011	-0.15803	0.08133	0.00752	-0.02391			-0.15803	0.08133	pepino				0.343	47.96	pepino		49.537	0.49537	36.1111	0.361111			0.361111	0.49537	pepino		20.3704	63.8889	0.318841	23.1481	36.1111	0.641026		0.641026	0.318841	pepino
66_p142KF561603_2011	-0.16658	0.08253	0.02469	-0.02895			-0.16658	0.08253	pepino				0.352	47.96	pepino		49.537	0.49537	37.037	0.37037			0.37037	0.49537	pepino		20.3704	62.963	0.323529	23.1481	37.037	0.625		0.625	0.323529	pepino
67_p143KF561602_2011	-0.15803	0.08133	0.00752	-0.02391			-0.15803	0.08133	pepino				0.343	47.96	pepino		49.537	0.49537	36.1111	0.361111			0.361111	0.49537	pepino		20.3704	63.8889	0.318841	23.1481	36.1111	0.641026		0.641026	0.318841	pepino
68_p144KF561601_2011	-0.15803	0.08133	0.00752	-0.02391			-0.15803	0.08133	pepino				0.343	47.96	pepino		49.537	0.49537	36.1111	0.361111			0.361111	0.49537	pepino		20.3704	63.8889	0.318841	23.1481	36.1111	0.641026		0.641026	0.318841	pepino
69_p145KF561600_2011	-0.15803	0.08133	0.00752	-0.02391			-0.15803	0.08133	pepino				0.343	47.96	pepino		49.537	0.49537	36.1111	0.361111			0.361111	0.49537	pepino		20.3704	63.8889	0.318841	23.1481	36.1111	0.641026		0.641026	0.318841	pepino
70_p146KF561599_2011	-0.16595	0.11051	0.02536	0.00137			-0.16595	0.11051	pepino				0.333	44.02	pepino		49.537	0.49537	35.1852	0.351852			0.351852	0.49537	pepino		21.2963	64.8148	0.328571	22.2222	35.1852	0.631579		0.631579	0.328571	pepino
71_p147KF561598_2011	-0.15098	0.07186	-0.00596	-0.03518			-0.15098	0.07186	pepino				0.352	47.27	pepino		49.0741	0.490741	37.037	0.37037			0.37037	0.490741	pepino		19.4444	62.963	0.308824	24.0741	37.037	0.65		0.65	0.308824	pepino
72_p148KF561597_2011	-0.15803	0.08133	0.00752	-0.02391			-0.15803	0.08133	pepino				0.343	47.96	pepino		49.537	0.49537	36.1111	0.361111			0.361111	0.49537	pepino		20.3704	63.8889	0.318841	23.1481	36.1111	0.641026		0.641026	0.318841	pepino
73_p149KF561596_2011	-0.04029	-0.18004	0.08064	0.19767			-0.04029	-0.18004	pepino				0.333	47.81	pepino		50.463	0.50463	35.1852	0.351852			0.351852	0.50463	pepino		22.2222	64.8148	0.342857	22.2222	35.1852	0.631579		0.631579	0.342857	pepino
74_p150KF561595_2011	-0.04029	-0.18004	0.08064	0.19767			-0.04029	-0.18004	pepino				0.333	47.81	pepino		50.463	0.50463	35.1852	0.351852			0.351852	0.50463	pepino		22.2222	64.8148	0.342857	22.2222	35.1852	0.631579		0.631579	0.342857	pepino
75_p151KF561594_2011	-0.15851	0.09522	0.007	-0.02344			-0.15851	0.09522	pepino				0.324	45.28	pepino		49.537	0.49537	34.2593	0.342593			0.342593	0.49537	pepino		20.3704	65.7407	0.309859	22.2222	34.2593	0.648649		0.648649	0.309859	pepino
76_p152KF561593_2011	-0.04029	-0.18004	0.08064	0.19767			-0.04029	-0.18004	pepino				0.333	47.81	pepino		50.463	0.50463	35.1852	0.351852			0.351852	0.50463	pepino		22.2222	64.8148	0.342857	22.2222	35.1852	0.631579		0.631579	0.342857	pepino
77_p153KF561592_2011	-0.04029	-0.18004	0.08064	0.19767			-0.04029	-0.18004	pepino				0.333	47.81	pepino		50.463	0.50463	35.1852	0.351852			0.351852	0.50463	pepino		22.2222	64.8148	0.342857	22.2222	35.1852	0.631579		0.631579	0.342857	pepino
78_p154KF561591_2011	-0.15265	0.06039	0.00015	-0.04334			-0.15265	0.06039	pepino				0.34	48.9	pepino		49.537	0.49537	37.037	0.37037			0.37037	0.49537	pepino		19.4444	62.963	0.308824	24.0741	37.037	0.65		0.65	0.308824	pepino
79_p156KF561590_2011	-0.14619	0.07552	0.00305	-0.04066			-0.14619	0.07552	pepino				0.333	48.5	pepino		50	0.5	35.1852	0.351852			0.351852	0.5	pepino		20.3704	64.8148	0.314286	23.1481	35.1852	0.657895		0.657895	0.314286	pepino
80_p157KF561589_2011	-0.1565	0.07002	-0.00073	-0.0428			-0.1565	0.07002	pepino				0.343	46.8	pepino		49.537	0.49537	36.1111	0.361111			0.361111	0.49537	pepino		20.3704	63.8889	0.318841	23.1481	36.1111	0.641026		0.641026	0.318841	pepino
81_p158KF561588_2011	-0.15204	0.07271	0.00152	-0.04233			-0.15204	0.07271	pepino				0.343	47.17	pepino		50	0.5	36.1111	0.361111			0.361111	0.5	pepino		20.3704	63.8889	0.318841	23.1481	36.1111	0.641026		0.641026	0.318841	pepino
82_p159KF561587_2011	-0.15765	0.0757	0.00041	-0.05145			-0.15765	0.0757	pepino				0.343	45.5	pepino		50	0.5	36.1111	0.361111			0.361111	0.5	pepino		20.3704	63.8889	0.318841	23.1481	36.1111	0.641026		0.641026	0.318841	pepino
83_p160KF561586_2011	-0.1565	0.07002	-0.00073	-0.0428			-0.1565	0.07002	pepino				0.343	46.8	pepino		49.537	0.49537	36.1111	0.361111			0.361111	0.49537	pepino		20.3704	63.8889	0.318841	23.1481	36.1111	0.641026		0.641026	0.318841	pepino
84_p161KF561585_2011	-0.10111	-0.00328	-0.0599	0.01634			-0.10111	-0.00328	pepino				0.362	51.82	pepino		50.463	0.50463	37.963	0.37963			0.37963	0.50463	pepino		19.4444	62.037	0.313433	24.0741	37.963	0.634146		0.634146	0.313433	pepino
85_p162KF561584_2011	-0.15401	0.07148	0.00027	-0.0534			-0.15401	0.07148	pepino				0.352	46.52	pepino		49.0741	0.490741	37.037	0.37037			0.37037	0.490741	pepino		19.4444	62.963	0.308824	24.0741	37.037	0.65		0.65	0.308824	pepino
86_p163KF561583_2011	-0.15401	0.07148	0.00027	-0.0534			-0.15401	0.07148	pepino				0.352	46.52	pepino		49.0741	0.490741	37.037	0.37037			0.37037	0.490741	pepino		19.4444	62.963	0.308824	24.0741	37.037	0.65		0.65	0.308824	pepino
87_p164KF561582_2011	-0.08372	0.1425	0.03043	-0.06669			-0.08372	0.1425	pepino				0.352	47.48	pepino		49.0741	0.490741	37.037	0.37037			0.37037	0.490741	pepino		19.4444	62.963	0.308824	24.0741	37.037	0.65		0.65	0.308824	pepino
88_p165KJ473993_2013	0.40975	0.13547	-0.31881	0.0061			0.40975	0.13547	potato				0.362	46.03	potato		50	0.5	37.963	0.37963			0.37963	0.5	potato		17.5926	62.037	0.283582	23.1481	37.963	0.609756		0.609756	0.283582	potato
89_p166KJ473992_2013	0.01925	-0.28474	-0.00355	0.19474			0.01925	-0.28474	potato				0.362	58.8	potato		51.3889	0.513889	37.963	0.37963			0.37963	0.513889	potato		20.3704	62.037	0.328358	23.1481	37.963	0.609756		0.609756	0.328358	potato
90_p167KJ569697_2013	0.22628	-0.27062	-0.126	0.28211			0.22628	-0.27062	potato				0.371	61	potato		50.9259	0.509259	38.8889	0.388889			0.388889	0.509259	potato		19.4444	61.1111	0.318182	24.0741	38.8889	0.619048		0.619048	0.318182	potato
91_p168KJ569696_2013	0.42677	-0.01344	-0.3182	0.11954			0.42677	-0.01344	potato				0.381	47.55	potato		50.9259	0.509259	39.8148	0.398148			0.398148	0.509259	potato		17.5926	60.1852	0.292308	25	39.8148	0.627907		0.627907	0.292308	potato
92_p169X57440_1990_G	0.15713	-0.4955	0.00644	0.11624			0.15713	-0.4955	tomato				0.371	61	tomato		50.463	0.50463	38.8889	0.388889			0.388889	0.50463	tomato		20.3704	61.1111	0.333333	22.2222	38.8889	0.571429		0.571429	0.333333	tomato
93_p170NC-001361_200	0.28081	-0.40961	0.11594	-0.20873			0.28081	-0.40961	tomato				0.381	61	tomato		50	0.5	39.8148	0.398148			0.398148	0.5	tomato		20.3704	60.1852	0.338462	22.2222	39.8148	0.55814		0.55814	0.338462	tomato
94_p171JX678982_2011	0.11435	-0.357	0.01158	0.14827			0.11435	-0.357	potato				0.371	57.38	potato		50.9259	0.509259	38.8889	0.388889			0.388889	0.509259	potato		19.4444	61.1111	0.318182	23.1481	38.8889	0.595238		0.595238	0.318182	potato
95_p172KJ194171_2013	0.12299	-0.27577	0.22491	0.09605			0.12299	-0.27577	potato				0.352	57.26	potato		51.8519	0.518519	37.037	0.37037			0.37037	0.518519	potato		21.2963	62.963	0.338235	23.1481	37.037	0.625		0.625	0.338235	potato
96_p173JN835299_2011	-0.15751	0.06812	-0.00341	-0.03595			-0.15751	0.06812	tomato				0.333	46.93	tomato		49.537	0.49537	35.1852	0.351852			0.351852	0.49537	tomato		21.2963	64.8148	0.328571	22.2222	35.1852	0.631579		0.631579	0.328571	tomato
97_p174HM854296_1985	0.01878	-0.304	0.0189	0.13454			0.01878	-0.304	potato				0.362	49.52	potato		51.8519	0.518519	37.963	0.37963			0.37963	0.518519	potato		21.2963	62.037	0.343284	23.1481	37.963	0.609756		0.609756	0.343284	potato
98_p175AY311395_2003	-0.12996	0.03176	-0.00944	-0.00304			-0.12996	0.03176	Un				0.371	51.92	Un		55.0926	0.550926	43.5185	0.435185			0.435185	0.550926	Un		15.7407	36.1111	0.435897	38.8889	43.5185	0.893617		0.893617	0.435897	Un
99_p176AY311394_2003	-0.10457	0.0215	-0.10535	-0.54741			-0.10457	0.0215	Un				0.362	49.81	Un		55.5556	0.555556	43.5185	0.435185			0.435185	0.555556	Un		13.8889	33.3333	0.416667	37.963	43.5185	0.87234		0.87234	0.416667	Un
100_p177EU604672_200	0.10449	-0.34159	0.01378	0.14458			0.10449	-0.34159	tobacco				0.362	58.04	tobacco		50.9259	0.509259	37.963	0.37963			0.37963	0.509259	tobacco		20.3704	62.037	0.328358	23.1481	37.963	0.609756		0.609756	0.328358	tobacco
101_p178AJ437481_200	-0.15924	0.06446	-0.00104	-0.03467			-0.15924	0.06446	pepino				0.333	47.5	pepino		50	0.5	35.1852	0.351852			0.351852	0.5	pepino		20.3704	64.8148	0.314286	23.1481	35.1852	0.657895		0.657895	0.314286	pepino
102_p179KC699728_201	0.12343	-0.34093	0.04109	-0.1657			0.12343	-0.34093	potato				0.362	61	potato		50	0.5	37.963	0.37963			0.37963	0.5	potato		19.4444	62.037	0.313433	21.2963	37.963	0.560976		0.560976	0.313433	potato
103_180KC699727_2011	0.32436	-0.11314	0.12717	-0.07983			0.32436	-0.11314	potato				0.39	59.09	potato		50.9259	0.509259	40.7407	0.407407			0.407407	0.509259	potato		18.5185	59.2593	0.3125	24.0741	40.7407	0.590909		0.590909	0.3125	potato
104_p181KC699726_201	0.54574	-0.32348	-0.40399	-0.74947			0.54574	-0.32348	potato				0.39	61	potato		50.463	0.50463	40.7407	0.407407			0.407407	0.50463	potato		18.5185	59.2593	0.3125	24.0741	40.7407	0.590909		0.590909	0.3125	potato
105_p182KC699725_201	0.79934	-0.51324	0.02087	-0.47574			0.79934	-0.51324	potato				0.371	56.87	potato		52.3148	0.523148	38.8889	0.388889			0.388889	0.523148	potato		20.3704	61.1111	0.333333	23.1481	38.8889	0.595238		0.595238	0.333333	potato
106_p183KC699724_201	0.25366	-0.53068	0.10646	-0.03497			0.25366	-0.53068	potato				0.381	55.72	potato		51.8519	0.518519	39.8148	0.398148			0.398148	0.518519	potato		19.4444	60.1852	0.323077	23.1481	39.8148	0.581395		0.581395	0.323077	potato
107_p184KC699723_201	0.78567	0.49959	0.95117	-0.03939			0.78567	0.49959	potato				0.413	54.03	potato		52.3148	0.523148	43.5185	0.435185			0.435185	0.523148	potato		19.4444	56.4815	0.344262	28.7037	43.5185	0.659574		0.659574	0.344262	potato
108_p185KC699722_201	0.75599	0.43785	0.84382	-0.01093			0.75599	0.43785	potato				0.404	54.18	potato		52.3148	0.523148	42.5926	0.425926			0.425926	0.523148	potato		21.2963	57.4074	0.370968	27.7778	42.5926	0.652174		0.652174	0.370968	potato
109_p186KC699721_201	0.78567	0.49959	0.95117	-0.03939			0.78567	0.49959	potato				0.413	54.03	potato		52.3148	0.523148	43.5185	0.435185			0.435185	0.523148	potato		19.4444	56.4815	0.344262	28.7037	43.5185	0.659574		0.659574	0.344262	potato
110_p187KC699720_201	0.24666	-0.51248	0.11874	-0.04495			0.24666	-0.51248	potato				0.381	55.61	potato		51.3889	0.513889	39.8148	0.398148			0.398148	0.513889	potato		19.4444	60.1852	0.323077	23.1481	39.8148	0.581395		0.581395	0.323077	potato
111_p188KC699719_201	0.24666	-0.51248	0.11874	-0.04495			0.24666	-0.51248	potato				0.381	55.61	potato		51.3889	0.513889	39.8148	0.398148			0.398148	0.513889	potato		19.4444	60.1852	0.323077	23.1481	39.8148	0.581395		0.581395	0.323077	potato
112_p189KC699718_201	0.24666	-0.51248	0.11874	-0.04495			0.24666	-0.51248	potato				0.381	55.61	potato		51.3889	0.513889	39.8148	0.398148			0.398148	0.513889	potato		19.4444	60.1852	0.323077	23.1481	39.8148	0.581395		0.581395	0.323077	potato
113_p190KC699717_201	0.83067	0.44323	-0.58743	-0.05025			0.83067	0.44323	potato				0.385	47.97	potato		48.1481	0.481481	40.7407	0.407407			0.407407	0.481481	potato		14.8148	59.2593	0.25	26.8519	40.7407	0.659091		0.659091	0.25	potato
114_p191KC699716_201	0.83067	0.44323	-0.58743	-0.05025			0.83067	0.44323	potato				0.385	47.97	potato		48.1481	0.481481	40.7407	0.407407			0.407407	0.481481	potato		14.8148	59.2593	0.25	26.8519	40.7407	0.659091		0.659091	0.25	potato
115_p192KC699715_201	0.24666	-0.51248	0.11874	-0.04495			0.24666	-0.51248	potato				0.381	55.61	potato		51.3889	0.513889	39.8148	0.398148			0.398148	0.513889	potato		19.4444	60.1852	0.323077	23.1481	39.8148	0.581395		0.581395	0.323077	potato
116_p198KC699714_201	0.8446	0.43356	-0.5975	-0.02644			0.8446	0.43356	potato				0.381	46.29	potato		48.6111	0.486111	39.8148	0.398148			0.398148	0.486111	potato		14.8148	60.1852	0.246154	26.8519	39.8148	0.674419		0.674419	0.246154	potato
117_p199KC699713_201	0.24666	-0.51248	0.11874	-0.04495			0.24666	-0.51248	potato				0.381	55.61	potato		51.3889	0.513889	39.8148	0.398148			0.398148	0.513889	potato		19.4444	60.1852	0.323077	23.1481	39.8148	0.581395		0.581395	0.323077	potato
118_KY364848_2016_Ch	0.52701	0.21973	-0.39121	0.28053			0.52701	0.21973	potato				0.371	44.07	potato		49.537	0.49537	38.8889	0.388889			0.388889	0.49537	potato		14.8148	61.1111	0.242424	25.9259	38.8889	0.666667		0.666667	0.242424	potato
119_MH558037_2018_Sl	-0.04066	-0.24119	0.00354	0.29534			-0.04066	-0.24119	tomato				0.381	52.85	tomato		50.463	0.50463	39.8148	0.398148			0.398148	0.50463	tomato		22.2222	60.1852	0.369231	23.1481	39.8148	0.581395		0.581395	0.369231	tomato
120_MH558036_2018_Sl	-0.04117	-0.2528	-0.00705	0.29945			-0.04117	-0.2528	tomato				0.352	51.72	tomato		50.463	0.50463	37.037	0.37037			0.37037	0.50463	tomato		22.2222	62.963	0.352941	22.2222	37.037	0.6		0.6	0.352941	tomato
121_MG356509_2015_Ba	0.7567	0.09154	-0.18013	0.36674			0.7567	0.09154	potato				0.417	51.69	potato		50.463	0.50463	44.4444	0.444444			0.444444	0.50463	potato		17.5926	55.5556	0.316667	25.9259	44.4444	0.583333		0.583333	0.316667	potato
122_MG356508_2015_Ba	0.7567	0.09154	-0.18013	0.36674			0.7567	0.09154	potato				0.417	51.69	potato		50.463	0.50463	44.4444	0.444444			0.444444	0.50463	potato		17.5926	55.5556	0.316667	25.9259	44.4444	0.583333		0.583333	0.316667	potato

## Sheet: Sheet3
			Origin
p77KF561668	2011	Yunnan	pepino
p78KF561667	2011	Yunnan	pepino
p79KF561666	2011	Yunnan	pepino
p80KF561665	2010	Gansu	pepino
p81KF561664	2010	Gansu	pepino
p82KF561663	2010	Gansu	tomato				p77KF561668	2011	Yunnan	pepino
p83KF561662	2010	Gansu	tomato				p78KF561667	2011	Yunnan	pepino
p84KF561661	2010	Gansu	tomato				p79KF561666	2011	Yunnan	pepino
p85KF561660	2011	Yunnan	pepino				p80KF561665	2010	Gansu	pepino
p86KF561659	2011	Yunnan	pepino				p81KF561664	2010	Gansu	pepino
p87KF561658	2011	Yunnan	pepino				p82KF561663	2010	Gansu	tomato
p88KF561657	2011	Yunnan	pepino				p83KF561662	2010	Gansu	tomato
p89KF561656	2011	Yunnan	pepino				p84KF561661	2010	Gansu	tomato
p90KF561655	2011	Yunnan	pepino				p85KF561660	2011	Yunnan	pepino
p91KF561654	2011	Yunnan	pepino				p86KF561659	2011	Yunnan	pepino
p92KF561653	2011	Yunnan	pepino				p87KF561658	2011	Yunnan	pepino
p93KF561652	2011	Yunnan	pepino				p88KF561657	2011	Yunnan	pepino
p94KF561651	2011	Yunnan	pepino				p89KF561656	2011	Yunnan	pepino
p95KF561650	2011	Yunnan	pepino				p90KF561655	2011	Yunnan	pepino
p96KF561649	2011	Yunnan	pepino				p91KF561654	2011	Yunnan	pepino
p97KF561648	2011	Yunnan	pepino				p92KF561653	2011	Yunnan	pepino
p98KF561647	2011	Yunnan	pepino				p93KF561652	2011	Yunnan	pepino
p99KF561646	2011	Yunnan	pepino				p94KF561651	2011	Yunnan	pepino
p100KF561645	2011	Yunnan	pepino				p95KF561650	2011	Yunnan	pepino
p101KF561644	2011	Yunnan	pepino				p96KF561649	2011	Yunnan	pepino
p102KF561643	2011	Yunnan	pepino				p97KF561648	2011	Yunnan	pepino
p103KF561642	2011	Yunnan	pepino				p98KF561647	2011	Yunnan	pepino
p104KF561641	2010	Gansu	pepino				p99KF561646	2011	Yunnan	pepino
p105KF561640	2010	Gansu	pepino				p100KF561645	2011	Yunnan	pepino
p106KF561639	2010	Gansu	pepino				p101KF561644	2011	Yunnan	pepino
p107KF561638	2010	Gansu	pepino				p102KF561643	2011	Yunnan	pepino
p108KF561637	2010	Gansu	pepino				p103KF561642	2011	Yunnan	pepino
p109KF561636	2010	Gansu	pepino				p104KF561641	2010	Gansu	pepino
p110KF561635	2010	Gansu	pepino				p105KF561640	2010	Gansu	pepino
p111KF561634	2010	Gansu	pepino				p106KF561639	2010	Gansu	pepino
p112KF561633	2010	Gansu	pepino				p107KF561638	2010	Gansu	pepino
p113KF561632	2010	Gansu	pepino				p108KF561637	2010	Gansu	pepino
p114KF561631	2010	Gansu	pepino				p109KF561636	2010	Gansu	pepino
p115KF561630	2010	Gansu	pepino				p110KF561635	2010	Gansu	pepino
p116KF561629	2010	Gansu	pepino				p111KF561634	2010	Gansu	pepino
p117KF561628	2010	Gansu	pepino				p112KF561633	2010	Gansu	pepino
p118KF561627	2010	Gansu	pepino				p113KF561632	2010	Gansu	pepino
p119KF561626	2010	Gansu	pepino				p114KF561631	2010	Gansu	pepino
p120KF561625	2010	Gansu	pepino				p115KF561630	2010	Gansu	pepino
p121KF561624	2010	Gansu	pepino				p116KF561629	2010	Gansu	pepino
p122KF561623	2010	Gansu	pepino				p117KF561628	2010	Gansu	pepino
p123KF561622	2010	Gansu	pepino				p118KF561627	2010	Gansu	pepino
p124KF561621	2010	Gansu	pepino				p119KF561626	2010	Gansu	pepino
p125KF561620	2011	Jilin	pepino				p120KF561625	2010	Gansu	pepino
p126KF561619	2011	Jilin	pepino				p121KF561624	2010	Gansu	pepino
p127KF561618	2011	Jilin	pepino				p122KF561623	2010	Gansu	pepino
p128KF561617	2011	Jilin	pepino				p123KF561622	2010	Gansu	pepino
p129KF561616	2011	Jilin	pepino				p124KF561621	2010	Gansu	pepino
p130KF561615	2011	Jilin	pepino				p125KF561620	2011	Jilin	pepino
p131KF561614	2011	Jilin	pepino				p126KF561619	2011	Jilin	pepino
p132KF561613	2011	Jilin	pepino				p127KF561618	2011	Jilin	pepino
p133KF561612	2011	Jilin	pepino				p128KF561617	2011	Jilin	pepino
p134KF561611	2011	Jilin	pepino				p129KF561616	2011	Jilin	pepino
p135KF561610	2011	Jilin	pepino				p130KF561615	2011	Jilin	pepino
p136KF561609	2011	Jilin	pepino				p131KF561614	2011	Jilin	pepino
p137KF561608	2011	Jilin	pepino				p132KF561613	2011	Jilin	pepino
p138KF561607	2011	Jilin	pepino				p133KF561612	2011	Jilin	pepino
p139KF561606	2011	Jilin	pepino				p134KF561611	2011	Jilin	pepino
p140KF561605	2011	Jilin	pepino				p135KF561610	2011	Jilin	pepino
p141KF561604	2011	Jilin	pepino				p136KF561609	2011	Jilin	pepino
p142KF561603	2011	Jilin	pepino				p137KF561608	2011	Jilin	pepino
p143KF561602	2011	Jilin	pepino				p138KF561607	2011	Jilin	pepino
p144KF561601	2011	Jilin	pepino				p139KF561606	2011	Jilin	pepino
p145KF561600	2011	Jilin	pepino				p140KF561605	2011	Jilin	pepino
p146KF561599	2011	Jilin	pepino				p141KF561604	2011	Jilin	pepino
p147KF561598	2011	Jilin	pepino				p142KF561603	2011	Jilin	pepino
p148KF561597	2011	Jilin	pepino				p143KF561602	2011	Jilin	pepino
p149KF561596	2011	Jilin	pepino				p144KF561601	2011	Jilin	pepino
p150KF561595	2011	Jilin	pepino				p145KF561600	2011	Jilin	pepino
p151KF561594	2011	Jilin	pepino				p146KF561599	2011	Jilin	pepino
p152KF561593	2011	Jilin	pepino				p147KF561598	2011	Jilin	pepino
p153KF561592	2011	Jilin	pepino				p148KF561597	2011	Jilin	pepino
p154KF561591	2011	Qinghai	pepino				p149KF561596	2011	Jilin	pepino
p156KF561590	2011	Qinghai	pepino				p150KF561595	2011	Jilin	pepino
p157KF561589	2011	Qinghai	pepino				p151KF561594	2011	Jilin	pepino
p158KF561588	2011	Qinghai	pepino				p152KF561593	2011	Jilin	pepino
p159KF561587	2011	Qinghai	pepino				p153KF561592	2011	Jilin	pepino
p160KF561586	2011	Qinghai	pepino				p154KF561591	2011	Qinghai	pepino
p161KF561585	2011	Beijing	pepino				p156KF561590	2011	Qinghai	pepino
p162KF561584	2011	Beijing	pepino				p157KF561589	2011	Qinghai	pepino
p163KF561583	2011	Beijing	pepino				p158KF561588	2011	Qinghai	pepino
p164KF561582	2011	Beijing	pepino				p159KF561587	2011	Qinghai	pepino
p165KJ473993	2013	Iran	potato				p160KF561586	2011	Qinghai	pepino
p166KJ473992	2013	Iran	potato				p161KF561585	2011	Beijing	pepino
p167KJ569697	2013	India	potato				p162KF561584	2011	Beijing	pepino
p168KJ569696	2013	India	potato				p163KF561583	2011	Beijing	pepino
p169X57440	1990	German	tomato				p164KF561582	2011	Beijing	pepino
p170NC-001361	2008	Russia	tomato				p165KJ473993	2013	Iran	potato
p171JX678982	2011	Iran	potato				p166KJ473992	2013	Iran	potato
p172KJ194171	2013	Iran	potato				p167KJ569697	2013	India	potato
p173JN835299	2011	Gansu	tomato				p168KJ569696	2013	India	potato
p174HM854296	1985	Czech Republic	potato				p169X57440	1990	German	tomato
p175AY311395	2003	Poland	Un				p170NC-001361	2008	Russia	tomato
p176AY311394	2003	Poland	Un				p171JX678982	2011	Iran	potato
p177EU604672	2008	Germany	tobacco				p172KJ194171	2013	Iran	potato
p178AJ437481	2002	Zhejiang	pepino				p173JN835299	2011	Gansu	tomato
p179KC699728	2011	Iran	potato				p174HM854296	1985	Czech Republic	potato
180KC699727	2011	Iran	potato				p175AY311395	2003	Poland	Un
p181KC699726	2011	Iran	potato				p176AY311394	2003	Poland	Un
p182KC699725	2011	Iran	potato				p177EU604672	2008	Germany	tobacco
p183KC699724	2011	Iran	potato				p178AJ437481	2002	Zhejiang	pepino
p184KC699723	2011	Iran	potato				p179KC699728	2011	Iran	potato
p185KC699722	2011	Iran	potato				180KC699727	2011	Iran	potato
p186KC699721	2011	Iran	potato				p181KC699726	2011	Iran	potato
p187KC699720	2011	Iran	potato				p182KC699725	2011	Iran	potato
p188KC699719	2011	Iran	potato				p183KC699724	2011	Iran	potato
p189KC699718	2011	Iran	potato				p184KC699723	2011	Iran	potato
p190KC699717	2011	Iran	potato				p185KC699722	2011	Iran	potato
p191KC699716	2011	Iran	potato				p186KC699721	2011	Iran	potato
p192KC699715	2011	Iran	potato				p187KC699720	2011	Iran	potato
p198KC699714	2011	Iran	potato				p188KC699719	2011	Iran	potato
p199KC699713	2011	Iran	potato				p189KC699718	2011	Iran	potato
KY364848	2016	China	potato				p190KC699717	2011	Iran	potato
MH558037	2018	Slovakia	tomato				p191KC699716	2011	Iran	potato
MH558036	2018	Slovakia	tomato				p192KC699715	2011	Iran	potato
MG356509	2015	Bangladesh	potato				p198KC699714	2011	Iran	potato
MG356508	2015	Bangladesh	potato				p199KC699713	2011	Iran	potato
							KY364848	2016	China	potato
							MH558037	2018	Slovakia	tomato
							MH558036	2018	Slovakia	tomato
							MG356509	2015	Bangladesh	potato
							MG356508	2015	Bangladesh	potato
